# Supplementary material for: The potassium channel Kcne3 is a VEGFA-inducible gene selectively expressed by vascular endothelial tip cells
Source: Angiogenesis. 2019 Nov 21;23(2):179–92. doi: 10.1007/s10456-019-09696-8 (PMC7160073; doi:10.1007/s10456-019-09696-8)
Supplement: Supplementary file 4 — Electronic supplementary material 2 (XLS 375 kb) [file 10456_2019_9696_MOESM4_ESM.xls]

## Sheet: VEGFA_vs_hFc
gene	description	fold.change	uncorrected_P.value	q.value	BH.corrected.P.value
Plekhb2	pleckstrin homology domain containing, family B (evectins) member 2	0.48	0.00994	0.0257	0.0666
Dbi	diazepam binding inhibitor	1.66	0.00997	0.0257	0.0666
Slc13a2os	solute carrier family 13 (sodium-dependent dicarboxylate transporter), member 2, opposite strand	4.6	0.00997	0.0257	0.0666
Zfp457	zinc finger protein 457	2.82	0.00996	0.0257	0.0666
BC051226	cDNA sequence BC051226	0.48	0.00993	0.0257	0.0666
Adamts19	a disintegrin-like and metallopeptidase (reprolysin type) with thrombospondin type 1 motif, 19	2.27	0.00994	0.0257	0.0666
Kcnab2	potassium voltage-gated channel, shaker-related subfamily, beta member 2	0.43	0.00993	0.0257	0.0666
Necap1	NECAP endocytosis associated 1	0.63	0.00995	0.0257	0.0666
Vash2	vasohibin 2	0.56	0.00991	0.0256	0.0665
Cacng7	calcium channel, voltage-dependent, gamma subunit 7	0.63	0.0099	0.0256	0.0665
Ky	kyphoscoliosis peptidase	0.41	0.00991	0.0256	0.0665
Msra	methionine sulfoxide reductase A	0.5	0.00988	0.0256	0.0664
Elp3	elongator acetyltransferase complex subunit 3	0.57	0.00988	0.0256	0.0664
Sf3b4	splicing factor 3b, subunit 4	0.57	0.00988	0.0256	0.0664
Chrdl1	chordin-like 1	2.16	0.00988	0.0256	0.0664
Slc22a17	solute carrier family 22 (organic cation transporter), member 17	0.61	0.0098	0.0255	0.0661
4930470H14Rik	RIKEN cDNA 4930470H14 gene	3	0.0098	0.0255	0.0661
Cacnb2	calcium channel, voltage-dependent, beta 2 subunit	1.74	0.00981	0.0255	0.0661
Irf2bp1	interferon regulatory factor 2 binding protein 1	0.47	0.00982	0.0255	0.0661
C330027C09Rik	RIKEN cDNA C330027C09 gene	2.04	0.00978	0.0254	0.066
Zswim5	zinc finger SWIM-type containing 5	0.65	0.00977	0.0254	0.066
Plekhg2	pleckstrin homology domain containing, family G (with RhoGef domain) member 2	2.08	0.00979	0.0254	0.066
Ankrd42	ankyrin repeat domain 42	1.83	0.00977	0.0254	0.066
Fbn1	fibrillin 1	1.97	0.00974	0.0254	0.0659
Dbp	D site albumin promoter binding protein	0.51	0.00975	0.0254	0.0659
Cks1brt	predicted gene 6531	2.43	0.00972	0.0253	0.0658
Zfp442	zinc finger protein 442	2.38	0.00971	0.0253	0.0657
Fhod1	formin homology 2 domain containing 1	1.86	0.0097	0.0253	0.0657
Nhlrc1	NHL repeat containing 1	0.58	0.00968	0.0253	0.0656
Fam213a	family with sequence similarity 213, member A	1.63	0.00958	0.0252	0.0654
Baalc	brain and acute leukemia, cytoplasmic	0.56	0.00961	0.0252	0.0654
Lysmd1	LysM, putative peptidoglycan-binding, domain containing 1	0.45	0.00959	0.0252	0.0654
Urod	uroporphyrinogen decarboxylase	0.39	0.0096	0.0252	0.0654
5730409E04Rik	RIKEN cDNA 5730409E04Rik gene	0.6	0.00963	0.0252	0.0654
Fhad1	forkhead-associated (FHA) phosphopeptide binding domain 1	2.47	0.00964	0.0252	0.0654
Pgd	phosphogluconate dehydrogenase	0.45	0.0096	0.0252	0.0654
Wsb2	WD repeat and SOCS box-containing 2	0.52	0.00961	0.0252	0.0654
Smyd5	SET and MYND domain containing 5	0.41	0.00959	0.0252	0.0654
Kdelr1	KDEL (Lys-Asp-Glu-Leu) endoplasmic reticulum protein retention receptor 1	0.6	0.00961	0.0252	0.0654
Sephs2	selenophosphate synthetase 2	0.59	0.00964	0.0252	0.0654
6430573F11Rik	RIKEN cDNA 6430573F11 gene	0.51	0.00958	0.0252	0.0654
Rab8a	RAB8A, member RAS oncogene family	0.5	0.00962	0.0252	0.0654
Tmsb15b2	thymosin beta 15b2	0.45	0.00963	0.0252	0.0654
Uhrf1	ubiquitin-like, containing PHD and RING finger domains, 1	2.28	0.00956	0.0252	0.0653
Selenbp1	selenium binding protein 1	0.44	0.00956	0.0252	0.0653
Mt3	metallothionein 3	0.33	0.00954	0.0251	0.0653
Pdk1	pyruvate dehydrogenase kinase, isoenzyme 1	0.62	0.00953	0.0251	0.0652
Sdhb	succinate dehydrogenase complex, subunit B, iron sulfur (Ip)	0.3	0.00952	0.0251	0.0651
Trim21	tripartite motif-containing 21	1.73	0.00951	0.0251	0.0651
Pbx4	pre B cell leukemia homeobox 4	0.52	0.00951	0.0251	0.0651
2310022B05Rik	RIKEN cDNA 2310022B05 gene	0.59	0.0095	0.0251	0.0651
Bmp1	bone morphogenetic protein 1	1.74	0.00947	0.025	0.065
Mrpl23	mitochondrial ribosomal protein L23	0.32	0.00945	0.025	0.0649
Pcdha10	protocadherin alpha 10	0.51	0.00942	0.025	0.0648
Ctxn1	cortexin 1	0.5	0.00941	0.0249	0.0648
Bmp4	bone morphogenetic protein 4	2.6	0.0094	0.0249	0.0647
Pcdha3	protocadherin alpha 3	0.49	0.0094	0.0249	0.0647
Rltpr	RGD motif, leucine rich repeats, tropomodulin domain and proline-rich containing	0.6	0.00939	0.0249	0.0647
Mllt1	myeloid/lymphoid or mixed-lineage leukemia (trithorax homolog, Drosophila); translocated to, 1	0.54	0.00936	0.0249	0.0646
Gm11110	predicted gene 11110	0.55	0.00937	0.0249	0.0646
Pde2a	phosphodiesterase 2A, cGMP-stimulated	0.61	0.00936	0.0249	0.0646
Gm7102	predicted gene 7102	1.77	0.00934	0.0248	0.0645
A730036I17Rik	RIKEN cDNA A730036I17 gene	0.43	0.00933	0.0248	0.0644
Stac2	SH3 and cysteine rich domain 2	0.58	0.0093	0.0248	0.0643
Rps15a	ribosomal protein S15A	0.39	0.00926	0.0247	0.064
Cdh18	cadherin 18	0.51	0.00922	0.0246	0.0638
Kcna4	potassium voltage-gated channel, shaker-related subfamily, member 4	0.47	0.00921	0.0246	0.0638
Rab4a	RAB4A, member RAS oncogene family	0.49	0.00919	0.0245	0.0637
Psmg3	proteasome (prosome, macropain) assembly chaperone 3	0.39	0.00917	0.0245	0.0636
Smim12	small integral membrane protein 12	0.4	0.00915	0.0244	0.0635
Maob	monoamine oxidase B	0.43	0.00915	0.0244	0.0635
Golm1	golgi membrane protein 1	2	0.00907	0.0243	0.0631
Fam195a	family with sequence similarity 195, member A	0.32	0.00909	0.0243	0.0631
Klhdc3	kelch domain containing 3	0.41	0.00908	0.0243	0.0631
Cdc42ep2	CDC42 effector protein (Rho GTPase binding) 2	0.37	0.00908	0.0243	0.0631
Aes	amino-terminal enhancer of split	0.43	0.00906	0.0243	0.063
Pgm2	phosphoglucomutase 2	0.47	0.00906	0.0243	0.063
Mfap2	microfibrillar-associated protein 2	0.38	0.00903	0.0243	0.063
Cln8	ceroid-lipofuscinosis, neuronal 8	0.42	0.00906	0.0243	0.063
Usp11	ubiquitin specific peptidase 11	0.65	0.00904	0.0243	0.063
Slc36a1os	solute carrier family 36 (proton/amino acid symporter), member 1, opposite strand	2.41	0.00901	0.0242	0.0629
Nxph4	neurexophilin 4	0.5	0.009	0.0242	0.0628
Coprs	coordinator of PRMT5, differentiation stimulator	0.46	0.009	0.0242	0.0628
Rims1	regulating synaptic membrane exocytosis 1	0.59	0.00898	0.0242	0.0627
Cnih3	cornichon homolog 3 (Drosophila)	0.41	0.00897	0.0242	0.0627
Ppp1r1b	protein phosphatase 1, regulatory (inhibitor) subunit 1B	0.34	0.00898	0.0242	0.0627
Anapc11	anaphase promoting complex subunit 11	0.39	0.00898	0.0242	0.0627
Net1	neuroepithelial cell transforming gene 1	1.62	0.00897	0.0242	0.0627
Kcnk1	potassium channel, subfamily K, member 1	0.54	0.00896	0.0242	0.0627
Creg2	cellular repressor of E1A-stimulated genes 2	0.54	0.00893	0.0241	0.0626
D10Jhu81e	DNA segment, Chr 10, Johns Hopkins University 81 expressed	0.5	0.00892	0.0241	0.0625
Dcxr	dicarbonyl L-xylulose reductase	0.34	0.00892	0.0241	0.0625
Lyar	Ly1 antibody reactive clone	1.62	0.00892	0.0241	0.0625
Abhd12	abhydrolase domain containing 12	0.37	0.00888	0.024	0.0623
Gm11423	predicted gene 11423	2.25	0.00886	0.024	0.0622
Yod1	YOD1 OTU deubiquitinating enzyme 1 homologue (S. cerevisiae)	2.24	0.00883	0.0239	0.0621
Snf8	SNF8, ESCRT-II complex subunit, homolog (S. cerevisiae)	0.35	0.00882	0.0239	0.0621
Gstm1	glutathione S-transferase, mu 1	0.42	0.00883	0.0239	0.0621
Ccdc71	coiled-coil domain containing 71	0.4	0.00882	0.0239	0.0621
Usp51	ubiquitin specific protease 51	1.77	0.00884	0.0239	0.0621
Fam134a	family with sequence similarity 134, member A	0.47	0.00879	0.0239	0.062
Krt24	keratin 24	0.58	0.00878	0.0239	0.062
Myom1	myomesin 1	2.36	0.0088	0.0239	0.062
Wwp2	WW domain containing E3 ubiquitin protein ligase 2	0.48	0.00878	0.0239	0.062
Chrnb4	cholinergic receptor, nicotinic, beta polypeptide 4	1.89	0.0088	0.0239	0.062
Mzt2	mitotic spindle organizing protein 2	0.38	0.00876	0.0238	0.0619
Eef1g	eukaryotic translation elongation factor 1 gamma	0.31	0.00875	0.0238	0.0618
Slc35c2	solute carrier family 35, member C2	0.51	0.00874	0.0238	0.0618
Agpat4	1-acylglycerol-3-phosphate O-acyltransferase 4 (lysophosphatidic acid acyltransferase, delta)	0.56	0.0087	0.0237	0.0616
Sult1a1	sulfotransferase family 1A, phenol-preferring, member 1	2.17	0.0087	0.0237	0.0616
Atf3	activating transcription factor 3	2.14	0.00867	0.0237	0.0615
Kcnip3	Kv channel interacting protein 3, calsenilin	0.6	0.00866	0.0237	0.0614
Arhgap20	Rho GTPase activating protein 20	0.55	0.00867	0.0237	0.0614
Pomgnt2	protein O-linked mannose beta 1,4-N-acetylglucosaminyltransferase 2	0.43	0.00866	0.0237	0.0614
Spats2l	spermatogenesis associated, serine-rich 2-like	0.59	0.00863	0.0236	0.0613
Elk4	ELK4, member of ETS oncogene family	2.21	0.00862	0.0236	0.0613
Gabrg1	gamma-aminobutyric acid (GABA) A receptor, subunit gamma 1	0.5	0.0086	0.0236	0.0612
Pvrl2	poliovirus receptor-related 2	0.52	0.00859	0.0235	0.0611
Trappc6a	trafficking protein particle complex 6A	0.37	0.00854	0.0234	0.0608
Ctso	cathepsin O	1.58	0.00852	0.0234	0.0607
Gm11696	predicted gene 11696	1.7	0.00849	0.0234	0.0606
Atf7	activating transcription factor 7	2.35	0.00849	0.0234	0.0606
Slc7a4	solute carrier family 7 (cationic amino acid transporter, y+ system), member 4	0.46	0.0085	0.0234	0.0606
Fem1a	feminization 1 homolog a (C. elegans)	0.59	0.0085	0.0234	0.0606
Por	P450 (cytochrome) oxidoreductase	0.47	0.0085	0.0234	0.0606
Gm14023	predicted gene 14023	2.38	0.00847	0.0233	0.0606
Cd99l2	CD99 antigen-like 2	0.59	0.00847	0.0233	0.0606
Dph6	diphthamine biosynthesis 6	1.52	0.00846	0.0233	0.0605
Nop58	NOP58 ribonucleoprotein	1.8	0.0084	0.0232	0.0603
Cfh	complement component factor h	1.92	0.0084	0.0232	0.0603
Tgds	TDP-glucose 4,6-dehydratase	1.96	0.00841	0.0232	0.0603
Eif4b	eukaryotic translation initiation factor 4B	0.64	0.00841	0.0232	0.0603
Fndc3b	fibronectin type III domain containing 3B	1.76	0.0084	0.0232	0.0603
Epm2aip1	EPM2A (laforin) interacting protein 1	2.06	0.00842	0.0232	0.0603
Kcnc2	potassium voltage gated channel, Shaw-related subfamily, member 2	0.47	0.00838	0.0232	0.0602
Sned1	sushi, nidogen and EGF-like domains 1	2.52	0.00836	0.0232	0.0601
Ska3	spindle and kinetochore associated complex subunit 3	2.18	0.00836	0.0232	0.0601
Gpc1	glypican 1	0.66	0.00834	0.0231	0.06
A930016O22Rik	RIKEN cDNA A930016O22 gene	2.62	0.00829	0.023	0.0597
Pou3f3	POU domain, class 3, transcription factor 3	0.53	0.00825	0.0229	0.0595
Ubr7	ubiquitin protein ligase E3 component n-recognin 7 (putative)	0.64	0.00826	0.0229	0.0595
Alcam	activated leukocyte cell adhesion molecule	0.56	0.00825	0.0229	0.0595
Cd274	CD274 antigen	2.99	0.00822	0.0229	0.0595
Slc35a1	solute carrier family 35 (CMP-sialic acid transporter), member 1	2.09	0.00825	0.0229	0.0595
B4galt1	UDP-Gal:betaGlcNAc beta 1,4- galactosyltransferase, polypeptide 1	1.61	0.00822	0.0229	0.0595
Herc6	hect domain and RLD 6	2.1	0.00827	0.0229	0.0595
Trim43b	tripartite motif-containing 43B	2.03	0.00826	0.0229	0.0595
Kctd12b	potassium channel tetramerisation domain containing 12b	1.81	0.00827	0.0229	0.0595
Igfn1	immunoglobulin-like and fibronectin type III domain containing 1	3.46	0.00821	0.0229	0.0594
Psme2	proteasome (prosome, macropain) activator subunit 2 (PA28 beta)	0.44	0.00821	0.0229	0.0594
Park7	Parkinson disease (autosomal recessive, early onset) 7	0.35	0.00819	0.0229	0.0593
Ppp2r4	protein phosphatase 2A activator, regulatory subunit B	0.34	0.00817	0.0228	0.0592
Fbxo48	F-box protein 48	3.51	0.00812	0.0227	0.059
Bloc1s5	biogenesis of lysosomal organelles complex-1, subunit 5, muted	0.46	0.00814	0.0227	0.059
Lrrc24	leucine rich repeat containing 24	0.44	0.00813	0.0227	0.059
Hmgb1-rs17	high mobility group box 1, related sequence 17	2.03	0.00814	0.0227	0.059
Hyal2	hyaluronoglucosaminidase 2	0.41	0.00814	0.0227	0.059
E230016K23Rik	RIKEN cDNA E230016K23 gene	3.64	0.00811	0.0227	0.0589
Psmb5	proteasome (prosome, macropain) subunit, beta type 5	0.34	0.00809	0.0227	0.0589
Cyp2e1	cytochrome P450, family 2, subfamily e, polypeptide 1	2.89	0.00809	0.0227	0.0589
Ofd1	oral-facial-digital syndrome 1 gene homolog (human)	1.77	0.00809	0.0227	0.0589
Rsrp1	arginine/serine rich protein 1	2.41	0.00807	0.0226	0.0588
Klc1	kinesin light chain 1	0.61	0.00803	0.0226	0.0586
Eml2	echinoderm microtubule associated protein like 2	0.51	0.00804	0.0226	0.0586
Fbxo4	F-box protein 4	1.63	0.008	0.0225	0.0584
Rab35	RAB35, member RAS oncogene family	0.63	0.008	0.0225	0.0584
Suds3	suppressor of defective silencing 3 homolog (S. cerevisiae)	0.32	0.008	0.0225	0.0584
Trappc4	trafficking protein particle complex 4	0.42	0.00799	0.0225	0.0584
Rpl15	ribosomal protein L15	0.35	0.00796	0.0224	0.0583
Rbm26	RNA binding motif protein 26	2.07	0.00794	0.0224	0.0583
Vwa7	von Willebrand factor A domain containing 7	2.26	0.00792	0.0224	0.0583
Tubb5	tubulin, beta 5 class I	0.43	0.00797	0.0224	0.0583
Slc35b2	solute carrier family 35, member B2	0.3	0.00795	0.0224	0.0583
Rin1	Ras and Rab interactor 1	2.45	0.00791	0.0224	0.0583
P2ry1	purinergic receptor P2Y, G-protein coupled 1	0.55	0.00796	0.0224	0.0583
Glrb	glycine receptor, beta subunit	0.57	0.00796	0.0224	0.0583
Trim30d	tripartite motif-containing 30D	3.09	0.00794	0.0224	0.0583
Fyco1	FYVE and coiled-coil domain containing 1	3.05	0.00795	0.0224	0.0583
Uba1	ubiquitin-like modifier activating enzyme 1	0.47	0.00795	0.0224	0.0583
Zcchc18	zinc finger, CCHC domain containing 18	0.66	0.00795	0.0224	0.0583
Dagla	diacylglycerol lipase, alpha	0.62	0.00789	0.0224	0.0582
Tulp3	tubby-like protein 3	1.8	0.00789	0.0224	0.0582
Ttc27	tetratricopeptide repeat domain 27	0.54	0.00788	0.0224	0.0581
Tmc2	transmembrane channel-like gene family 2	2.88	0.00787	0.0224	0.0581
Podn	podocan	2.44	0.00788	0.0224	0.0581
Gm15421	ribosomal protein L22 like 1 pseudogene	2.49	0.00787	0.0224	0.0581
Faap20	RIKEN cDNA 2610002J02 gene	0.48	0.00784	0.0223	0.0579
Pomk	protein-O-mannose kinase	0.45	0.00781	0.0223	0.0578
Garnl3	GTPase activating RANGAP domain-like 3	0.6	0.0078	0.0222	0.0577
Capn3	calpain 3	0.19	0.0078	0.0222	0.0577
Mtmr10	myotubularin related protein 10	1.74	0.00778	0.0222	0.0576
Gm10432	predicted gene 10432	3.58	0.00776	0.0222	0.0575
Lrit3	leucine-rich repeat, immunoglobulin-like and transmembrane domains 3	1.91	0.00776	0.0222	0.0575
Spink13	serine peptidase inhibitor, Kazal type 13	0.28	0.00775	0.0221	0.0575
Tada3	transcriptional adaptor 3	0.49	0.00775	0.0221	0.0575
Nipsnap1	4-nitrophenylphosphatase domain and non-neuronal SNAP25-like protein homolog 1 (C. elegans)	0.51	0.00773	0.0221	0.0574
2700038G22Rik	RIKEN cDNA 2700038G22 gene	2.55	0.00771	0.0221	0.0574
Eogt	EGF domain-specific O-linked N-acetylglucosamine (GlcNAc) transferase	2.17	0.00772	0.0221	0.0574
Irx6	Iroquois related homeobox 6 (Drosophila)	0.57	0.00771	0.0221	0.0574
Klc2	kinesin light chain 2	0.54	0.00771	0.0221	0.0573
Jagn1	jagunal homolog 1 (Drosophila)	0.4	0.0077	0.0221	0.0573
Atox1	ATX1 (antioxidant protein 1) homolog 1 (yeast)	0.38	0.00767	0.022	0.0572
Enox1	ecto-NOX disulfide-thiol exchanger 1	0.52	0.00765	0.022	0.057
Litaf	LPS-induced TN factor	1.99	0.00765	0.022	0.057
Rai2	retinoic acid induced 2	0.57	0.00764	0.022	0.057
Mtfr2	mitochondrial fission regulator 2	2.89	0.00761	0.0219	0.0569
Psap	prosaposin	0.56	0.00762	0.0219	0.0569
Vcan	versican	2.27	0.00762	0.0219	0.0569
Rab3d	RAB3D, member RAS oncogene family	0.45	0.00761	0.0219	0.0569
Clybl	citrate lyase beta like	0.3	0.00759	0.0219	0.0568
Rpl39	ribosomal protein L39	0.28	0.00758	0.0219	0.0568
Ccbl1	cysteine conjugate-beta lyase 1	0.49	0.00755	0.0218	0.0566
Gm10785	predicted gene 10785	1.83	0.00754	0.0218	0.0565
Spag8	sperm associated antigen 8	2.41	0.00754	0.0218	0.0565
Rrp7a	ribosomal RNA processing 7 homolog A (S. cerevisiae)	0.34	0.00751	0.0217	0.0564
Ndufs7	NADH dehydrogenase (ubiquinone) Fe-S protein 7	0.34	0.0075	0.0217	0.0563
Ung	uracil DNA glycosylase	1.77	0.0075	0.0217	0.0563
Nphs1	nephrosis 1, nephrin	1.95	0.00749	0.0217	0.0563
Dmd	dystrophin, muscular dystrophy	2.36	0.0075	0.0217	0.0563
Cd83	CD83 antigen	0.49	0.00742	0.0215	0.0559
Rps6ka4	ribosomal protein S6 kinase, polypeptide 4	0.42	0.00739	0.0215	0.0557
Abtb1	ankyrin repeat and BTB (POZ) domain containing 1	0.41	0.00736	0.0214	0.0556
Gabarapl1	gamma-aminobutyric acid (GABA) A receptor-associated protein-like 1	0.41	0.00737	0.0214	0.0556
Syt4	synaptotagmin IV	0.56	0.00732	0.0213	0.0554
Nudt11	nudix (nucleoside diphosphate linked moiety X)-type motif 11	0.47	0.00733	0.0213	0.0554
Brca1	breast cancer 1	1.83	0.0073	0.0213	0.0552
2410006H16Rik	RIKEN cDNA 2410006H16 gene	0.31	0.00723	0.0212	0.055
Tekt1	tektin 1	0.37	0.00725	0.0212	0.055
Fam89b	family with sequence similarity 89, member B	0.52	0.00727	0.0212	0.055
Arrdc1	arrestin domain containing 1	0.53	0.00724	0.0212	0.055
Hpgds	hematopoietic prostaglandin D synthase	1.7	0.00725	0.0212	0.055
Nap1l2	nucleosome assembly protein 1-like 2	0.52	0.00726	0.0212	0.055
Htr2c	5-hydroxytryptamine (serotonin) receptor 2C	0.37	0.00725	0.0212	0.055
Aip	aryl-hydrocarbon receptor-interacting protein	0.3	0.00722	0.0211	0.0549
TrnV	tRNA valine, mitochondrial	0.41	0.00721	0.0211	0.0549
AI607873	expressed sequence AI607873	3.36	0.0072	0.0211	0.0548
Dhrs13	dehydrogenase/reductase (SDR family) member 13	0.31	0.00719	0.0211	0.0548
Acot2	acyl-CoA thioesterase 2	1.95	0.00719	0.0211	0.0548
Adgrf5	G protein-coupled receptor 116	2.36	0.00718	0.0211	0.0548
Mapk10	mitogen-activated protein kinase 10	0.65	0.00718	0.0211	0.0548
Strip1	striatin interacting protein 1	0.63	0.00717	0.0211	0.0547
Igsf21	immunoglobulin superfamily, member 21	0.46	0.00716	0.0211	0.0547
Arsa	arylsulfatase A	0.56	0.00714	0.021	0.0546
Pcdhgb2	protocadherin gamma subfamily B, 2	1.91	0.00714	0.021	0.0546
Snrnp25	small nuclear ribonucleoprotein 25 (U11/U12)	0.28	0.00711	0.021	0.0544
Ctbp1	C-terminal binding protein 1	0.58	0.0071	0.021	0.0544
Mcm7	minichromosome maintenance deficient 7 (S. cerevisiae)	0.49	0.0071	0.021	0.0544
Numbl	numb-like	0.65	0.00711	0.021	0.0544
Fam207a	family with sequence similarity 207, member A	0.48	0.00709	0.0209	0.0544
2700099C18Rik	NDC80 homolog, kinetochore complex component pseudogene	3.2	0.00708	0.0209	0.0544
Wdr91	WD repeat domain 91	0.57	0.00708	0.0209	0.0544
Ankrd28	ankyrin repeat domain 28	1.9	0.00707	0.0209	0.0543
H2-Q4	histocompatibility 2, Q region locus 4	2.53	0.00707	0.0209	0.0543
Cope	coatomer protein complex, subunit epsilon	0.32	0.00705	0.0209	0.0542
Mras	muscle and microspikes RAS	0.57	0.00704	0.0209	0.0542
Ralgds	ral guanine nucleotide dissociation stimulator	0.65	0.00703	0.0209	0.0541
Kptn	kaptin	0.4	0.00699	0.0207	0.0538
Cryl1	crystallin, lambda 1	0.3	0.00696	0.0207	0.0537
Isyna1	myo-inositol 1-phosphate synthase A1	0.39	0.00697	0.0207	0.0537
Gnl3	guanine nucleotide binding protein-like 3 (nucleolar)	1.91	0.00695	0.0207	0.0536
Dcakd	dephospho-CoA kinase domain containing	0.52	0.00694	0.0206	0.0536
Lrrfip1	leucine rich repeat (in FLII) interacting protein 1	2.15	0.00691	0.0206	0.0535
Naip2	NLR family, apoptosis inhibitory protein 2	2.24	0.00692	0.0206	0.0535
Got1	glutamate oxaloacetate transaminase 1, soluble	0.53	0.00692	0.0206	0.0535
Col20a1	collagen, type XX, alpha 1	2.34	0.00693	0.0206	0.0535
Fto	fat mass and obesity associated	0.55	0.00693	0.0206	0.0535
Rnasek	ribonuclease, RNase K	0.43	0.00689	0.0206	0.0534
Ctsf	cathepsin F	0.42	0.00689	0.0206	0.0534
Tceal6	transcription elongation factor A (SII)-like 6	0.58	0.00688	0.0206	0.0534
Zbed6	zinc finger, BED domain containing 6	2.93	0.00686	0.0205	0.0533
Gm11544	predicted gene 11544	0.33	0.00687	0.0205	0.0533
Tuba1c	tubulin, alpha 1C	0.33	0.00686	0.0205	0.0533
A930001A20Rik	RIKEN cDNA A930001A20 gene	0.33	0.00687	0.0205	0.0533
Glra3	glycine receptor, alpha 3 subunit	0.37	0.00685	0.0205	0.0533
Armc6	armadillo repeat containing 6	0.38	0.00684	0.0205	0.0532
Gm14436	predicted gene 14436	2.39	0.00684	0.0205	0.0532
Akt1	thymoma viral proto-oncogene 1	0.43	0.00678	0.0203	0.0528
Vps26b	vacuolar protein sorting 26 homolog B (yeast)	0.64	0.00678	0.0203	0.0528
Dhdh	dihydrodiol dehydrogenase (dimeric)	1.73	0.00676	0.0203	0.0527
Cryga	crystallin, gamma A	0.21	0.00671	0.0203	0.0526
Smarcb1	SWI/SNF related, matrix associated, actin dependent regulator of chromatin, subfamily b, member 1	0.45	0.0067	0.0203	0.0526
Rdh11	retinol dehydrogenase 11	0.51	0.0067	0.0203	0.0526
Gm10371	predicted gene 10371	2.14	0.00672	0.0203	0.0526
Bnip1	BCL2/adenovirus E1B interacting protein 1	0.51	0.00673	0.0203	0.0526
Rpl36	ribosomal protein L36	0.28	0.00673	0.0203	0.0526
Helz2	helicase with zinc finger 2, transcriptional coactivator	1.94	0.00672	0.0203	0.0526
E130218I03Rik	RIKEN cDNA E130218I03 gene	0.43	0.00671	0.0203	0.0526
Npm3-ps1	nucleoplasmin 3, pseudogene 1	0.42	0.00671	0.0203	0.0526
Ldha	lactate dehydrogenase A	0.36	0.00674	0.0203	0.0526
Stard10	START domain containing 10	0.25	0.00672	0.0203	0.0526
AY512931	cDNA sequence AY512931	2.38	0.00671	0.0203	0.0526
Nudt15	nudix (nucleoside diphosphate linked moiety X)-type motif 15	0.55	0.00667	0.0202	0.0525
Slc35c1	solute carrier family 35, member C1	0.59	0.00667	0.0202	0.0525
Use1	unconventional SNARE in the ER 1 homolog (S. cerevisiae)	0.27	0.00668	0.0202	0.0525
Zfp423	zinc finger protein 423	0.59	0.00664	0.0201	0.0523
Serinc4	serine incorporator 4	1.78	0.00662	0.0201	0.0522
Insr	insulin receptor	2.2	0.0066	0.0201	0.0521
Pgk1	phosphoglycerate kinase 1	0.49	0.0066	0.0201	0.0521
Rxrg	retinoid X receptor gamma	0.46	0.00654	0.0199	0.0516
Psmb3	proteasome (prosome, macropain) subunit, beta type 3	0.29	0.00653	0.0199	0.0516
Yars	tyrosyl-tRNA synthetase	0.45	0.00649	0.0198	0.0513
Gadl1	glutamate decarboxylase-like 1	4.05	0.00648	0.0198	0.0513
Spata13	spermatogenesis associated 13	2.09	0.00646	0.0197	0.0512
Zc3h10	zinc finger CCCH type containing 10	0.5	0.00646	0.0197	0.0511
Gm14057	Ppp1r14c pseudogene	0.47	0.00645	0.0197	0.0511
Gm5860	predicted gene 5860	3.59	0.00645	0.0197	0.0511
Dctpp1	dCTP pyrophosphatase 1	0.26	0.00644	0.0197	0.0511
Dbnl	drebrin-like	0.38	0.00642	0.0197	0.051
Prr11	proline rich 11	1.6	0.00643	0.0197	0.051
Spg21	spastic paraplegia 21 homolog (human)	0.35	0.00642	0.0196	0.051
Eif2b5	eukaryotic translation initiation factor 2B, subunit 5 epsilon	0.33	0.0064	0.0196	0.0509
Slc6a11	solute carrier family 6 (neurotransmitter transporter, GABA), member 11	0.57	0.00639	0.0196	0.0508
Bcas3	breast carcinoma amplified sequence 3	0.48	0.00634	0.0195	0.0505
Sgol1	shugoshin-like 1 (S. pombe)	2.33	0.0063	0.0194	0.0502
Fkbp4	FK506 binding protein 4	0.36	0.00627	0.0193	0.05
Usp26	ubiquitin specific peptidase 26	3.91	0.00627	0.0193	0.05
Pcp4l1	Purkinje cell protein 4-like 1	0.4	0.00621	0.0191	0.0496
Maf1	MAF1 homolog (S. cerevisiae)	0.33	0.00621	0.0191	0.0496
Vax2	ventral anterior homeobox 2	0.48	0.0062	0.0191	0.0496
Pxylp1	acid phosphatase-like 2	0.59	0.00621	0.0191	0.0496
Bmp2	bone morphogenetic protein 2	2.41	0.00615	0.019	0.0492
Bckdha	branched chain ketoacid dehydrogenase E1, alpha polypeptide	0.36	0.00614	0.019	0.0492
Ccdc176	coiled-coil domain containing 176	2.02	0.00613	0.0189	0.0491
2700089I24Rik	RIKEN cDNA 2700089I24 gene	5.29	0.00611	0.0189	0.0491
Ube2v1	ubiquitin-conjugating enzyme E2 variant 1	0.44	0.00613	0.0189	0.0491
Gm11837	predicted gene 11837	0.49	0.00613	0.0189	0.0491
Bloc1s4	biogenesis of lysosomal organelles complex-1, subunit 4, cappuccino	0.56	0.00612	0.0189	0.0491
Ppp2r2d	protein phosphatase 2, regulatory subunit B, delta	0.5	0.00612	0.0189	0.0491
Pcdhb4	protocadherin beta 4	0.53	0.0061	0.0189	0.049
Nkain4	Na+/K+ transporting ATPase interacting 4	0.39	0.00609	0.0189	0.049
BB283400	expressed sequence BB283400	1.86	0.00608	0.0189	0.049
Chmp1a	charged multivesicular body protein 1A	0.4	0.00606	0.0188	0.0488
Prmt8	protein arginine N-methyltransferase 8	0.65	0.00604	0.0188	0.0487
Melk	maternal embryonic leucine zipper kinase	2.4	0.00603	0.0187	0.0487
Samd15	sterile alpha motif domain containing 15	2.02	0.00601	0.0187	0.0485
Nol4	nucleolar protein 4	0.54	0.00599	0.0187	0.0484
B9d2	B9 protein domain 2	0.36	0.00599	0.0187	0.0484
Mfap3l	microfibrillar-associated protein 3-like	1.77	0.006	0.0187	0.0484
Ccdc92	coiled-coil domain containing 92	0.52	0.00598	0.0186	0.0484
4930452N14Rik	RIKEN cDNA 4930452N14 gene	2.48	0.00596	0.0186	0.0483
Unc5b	unc-5 homolog B (C. elegans)	1.76	0.00596	0.0186	0.0483
Mtcl1	SOGA family member 2	2.02	0.00595	0.0186	0.0483
Sesn2	sestrin 2	0.61	0.00596	0.0186	0.0483
Rab9b	RAB9B, member RAS oncogene family	0.51	0.00595	0.0186	0.0483
Pomc	pro-opiomelanocortin-alpha	0.34	0.00594	0.0186	0.0482
Cltb	clathrin, light polypeptide (Lcb)	0.39	0.00591	0.0185	0.0481
Chmp7	charged multivesicular body protein 7	0.42	0.00591	0.0185	0.0481
Rpe65	retinal pigment epithelium 65	2.53	0.00591	0.0185	0.0481
Zfp935	zinc finger protein 935	1.72	0.00588	0.0185	0.0479
Tmem200c	transmembrane protein 200C	0.49	0.00588	0.0185	0.0479
Dusp28	dual specificity phosphatase 28	0.35	0.00585	0.0184	0.0478
Zfp41	zinc finger protein 41	0.56	0.00585	0.0184	0.0478
Morn4	MORN repeat containing 4	0.48	0.00586	0.0184	0.0478
Smim10l2a	RIKEN cDNA 6330419J24 gene	0.49	0.00586	0.0184	0.0478
Vps72	vacuolar protein sorting 72 (yeast)	0.41	0.00582	0.0183	0.0476
Il13ra1	interleukin 13 receptor, alpha 1	2.88	0.00583	0.0183	0.0476
Ift27	intraflagellar transport 27	0.33	0.0058	0.0183	0.0475
Strn4	striatin, calmodulin binding protein 4	0.54	0.00579	0.0183	0.0474
Ngfr	nerve growth factor receptor (TNFR superfamily, member 16)	1.54	0.00577	0.0182	0.0473
Cox7a2l	cytochrome c oxidase subunit VIIa polypeptide 2-like	0.38	0.00578	0.0182	0.0473
Lonrf2	LON peptidase N-terminal domain and ring finger 2	0.57	0.00574	0.0181	0.0471
Hes5	hairy and enhancer of split 5 (Drosophila)	0.48	0.00573	0.0181	0.0471
Snx8	sorting nexin 8	0.39	0.00574	0.0181	0.0471
Ddt	D-dopachrome tautomerase	0.42	0.0057	0.018	0.0468
Ifi47	interferon gamma inducible protein 47	4.33	0.0057	0.018	0.0468
Caml	calcium modulating ligand	0.65	0.00567	0.018	0.0468
Krcc1	lysine-rich coiled-coil 1	1.8	0.0057	0.018	0.0468
Cyp4v3	cytochrome P450, family 4, subfamily v, polypeptide 3	1.52	0.0057	0.018	0.0468
Gipc1	GIPC PDZ domain containing family, member 1	0.39	0.00568	0.018	0.0468
Col4a4	collagen, type IV, alpha 4	2.16	0.00564	0.018	0.0467
Lrrc20	leucine rich repeat containing 20	0.49	0.00567	0.018	0.0467
Elk3	ELK3, member of ETS oncogene family	1.91	0.00565	0.018	0.0467
Nkiras2	NFKB inhibitor interacting Ras-like protein 2	0.32	0.00566	0.018	0.0467
Ptchd4	patched domain containing 4	0.46	0.00565	0.018	0.0467
Ccdc173	coiled-coil domain containing 173	2.12	0.00564	0.018	0.0467
Prkacb	protein kinase, cAMP dependent, catalytic, beta	0.62	0.00564	0.018	0.0467
A930003O13Rik	RIKEN cDNA A930003O13 gene	2.41	0.00566	0.018	0.0467
Smap2	small ArfGAP 2	0.54	0.00563	0.018	0.0466
0610007P14Rik	RIKEN cDNA 0610007P14 gene	0.54	0.0056	0.0179	0.0465
Snhg7	small nucleolar RNA host gene 7	2.23	0.00557	0.0178	0.0463
Gabra2	gamma-aminobutyric acid (GABA) A receptor, subunit alpha 2	0.45	0.00556	0.0178	0.0462
Traf4	TNF receptor associated factor 4	0.6	0.00553	0.0177	0.046
Tacr3	tachykinin receptor 3	0.61	0.00552	0.0177	0.046
Hdhd3	haloacid dehalogenase-like hydrolase domain containing 3	0.31	0.00553	0.0177	0.046
Pik3r2	phosphatidylinositol 3-kinase, regulatory subunit, polypeptide 2 (p85 beta)	0.48	0.00552	0.0177	0.046
Orai2	ORAI calcium release-activated calcium modulator 2	0.66	0.00551	0.0177	0.0459
Ccdc141	coiled-coil domain containing 141	2.14	0.00547	0.0176	0.0456
Fosb	FBJ osteosarcoma oncogene B	2.69	0.00545	0.0175	0.0455
Morf4l1-ps1	RIKEN cDNA A730098P11 gene	1.61	0.00543	0.0175	0.0454
Dsc2	desmocollin 2	1.87	0.00543	0.0175	0.0454
Clip2	CAP-GLY domain containing linker protein 2	0.62	0.00543	0.0175	0.0454
Csk	c-src tyrosine kinase	0.48	0.00542	0.0175	0.0453
St3gal3	ST3 beta-galactoside alpha-2,3-sialyltransferase 3	0.41	0.00541	0.0174	0.0453
Mettl23	methyltransferase like 23	0.38	0.00538	0.0174	0.0451
Plcl2	phospholipase C-like 2	0.61	0.00539	0.0174	0.0451
Txnip	thioredoxin interacting protein	0.63	0.00538	0.0174	0.0451
Lrguk	leucine-rich repeats and guanylate kinase domain containing	1.97	0.00536	0.0173	0.045
P4ha3	procollagen-proline, 2-oxoglutarate 4-dioxygenase (proline 4-hydroxylase), alpha polypeptide III	2.14	0.00533	0.0173	0.0448
Malat1	metastasis associated lung adenocarcinoma transcript 1 (non-coding RNA)	2.53	0.00532	0.0172	0.0447
Lin28a	lin-28 homolog A (C. elegans)	2.27	0.00532	0.0172	0.0447
Papolb	poly (A) polymerase beta (testis specific)	2.33	0.00532	0.0172	0.0447
Rusc2	RUN and SH3 domain containing 2	0.61	0.00529	0.0172	0.0445
Sync	syncoilin	0.34	0.00529	0.0172	0.0445
Synm	synemin, intermediate filament protein	1.57	0.00529	0.0172	0.0445
Gm5801	ubiquitin-conjugating enzyme E2, J2 homolog pseudogene	0.49	0.00527	0.0171	0.0445
Ebi3	Epstein-Barr virus induced gene 3	0.44	0.00523	0.017	0.0442
Chst1	carbohydrate (keratan sulfate Gal-6) sulfotransferase 1	0.65	0.00523	0.017	0.0442
Plek	pleckstrin	1.83	0.00518	0.0169	0.0439
Il9r	interleukin 9 receptor	1.84	0.00518	0.0169	0.0439
Ngfrap1	nerve growth factor receptor (TNFRSF16) associated protein 1	0.51	0.00519	0.0169	0.0439
Soat2	sterol O-acyltransferase 2	2.43	0.00516	0.0168	0.0437
Rps10	ribosomal protein S10	0.27	0.00514	0.0168	0.0437
Nr4a2	nuclear receptor subfamily 4, group A, member 2	0.54	0.00515	0.0168	0.0437
Asna1	arsA arsenite transporter, ATP-binding, homolog 1 (bacterial)	0.29	0.00516	0.0168	0.0437
Pin1	protein (peptidyl-prolyl cis/trans isomerase) NIMA-interacting 1	0.3	0.00515	0.0168	0.0437
Pls1	plastin 1 (I-isoform)	1.97	0.00515	0.0168	0.0437
Mest	mesoderm specific transcript	1.53	0.00513	0.0168	0.0436
Edc3	enhancer of mRNA decapping 3 homolog (S. cerevisiae)	0.52	0.00513	0.0168	0.0436
Nrtn	neurturin	0.27	0.00511	0.0167	0.0435
Cd3d	CD3 antigen, delta polypeptide	3.16	0.00511	0.0167	0.0435
9930111H07Rik	RIKEN cDNA 9930111H07 gene	2.21	0.0051	0.0167	0.0434
Dpp10	dipeptidylpeptidase 10	0.5	0.00509	0.0167	0.0434
Atp6v0b	ATPase, H+ transporting, lysosomal V0 subunit B	0.32	0.00507	0.0167	0.0433
Snrpn	small nuclear ribonucleoprotein N	3.71	0.00506	0.0166	0.0432
Adarb1	adenosine deaminase, RNA-specific, B1	0.65	0.00505	0.0166	0.0431
Cep290	centrosomal protein 290	3.25	0.00505	0.0166	0.0431
Acbd6	acyl-Coenzyme A binding domain containing 6	0.52	0.00502	0.0166	0.043
Rad51ap1	RAD51 associated protein 1	1.95	0.00502	0.0166	0.043
Galnt2	UDP-N-acetyl-alpha-D-galactosamine:polypeptide N-acetylgalactosaminyltransferase 2	0.66	0.00503	0.0166	0.043
Pycrl	pyrroline-5-carboxylate reductase-like	0.3	0.00501	0.0165	0.043
Tbr1	T-box brain gene 1	0.35	0.00501	0.0165	0.043
Gcc2	GRIP and coiled-coil domain containing 2	2.02	0.00501	0.0165	0.0429
Abhd17a	abhydrolase domain containing 17A	0.34	0.005	0.0165	0.0429
Sulf1	sulfatase 1	1.88	0.00497	0.0164	0.0427
Syne3	spectrin repeat containing, nuclear envelope family member 3	2.08	0.00496	0.0164	0.0427
Baz1a	bromodomain adjacent to zinc finger domain 1A	2.06	0.00496	0.0164	0.0426
Slc45a1	solute carrier family 45, member 1	0.52	0.00496	0.0164	0.0426
Dtnbp1	dystrobrevin binding protein 1	0.33	0.00493	0.0164	0.0425
Psmb2	proteasome (prosome, macropain) subunit, beta type 2	0.58	0.00493	0.0164	0.0425
Trim28	tripartite motif-containing 28	0.52	0.00494	0.0164	0.0425
Sh3bp5	SH3-domain binding protein 5 (BTK-associated)	0.57	0.00491	0.0163	0.0423
Ccl25	chemokine (C-C motif) ligand 25	1.97	0.0049	0.0163	0.0423
Abhd8	abhydrolase domain containing 8	0.34	0.00485	0.0161	0.0419
Coasy	Coenzyme A synthase	0.46	0.00483	0.0161	0.0417
Itgb5	integrin beta 5	0.47	0.00482	0.0161	0.0417
Rock2	Rho-associated coiled-coil containing protein kinase 2	2.38	0.00479	0.016	0.0416
Lcor	ligand dependent nuclear receptor corepressor	3.16	0.0048	0.016	0.0416
F8a	factor 8-associated gene A	0.47	0.00481	0.016	0.0416
Ubqln2	ubiquilin 2	0.66	0.00479	0.016	0.0415
Wdr93	WD repeat domain 93	1.92	0.00477	0.016	0.0414
Gm1673	predicted gene 1673	0.49	0.00476	0.0159	0.0414
Vhl	von Hippel-Lindau tumor suppressor	0.61	0.00473	0.0159	0.0412
Thoc2	THO complex 2	2.22	0.00473	0.0159	0.0412
Mob3c	MOB kinase activator 3C	1.9	0.00468	0.0157	0.0408
Adprh	ADP-ribosylarginine hydrolase	0.39	0.00466	0.0157	0.0407
Zc3h12b	zinc finger CCCH-type containing 12B	1.98	0.00467	0.0157	0.0407
BC021785	cDNA sequence BC021785	2.34	0.00463	0.0156	0.0406
Dna2	DNA replication helicase 2 homolog (yeast)	1.89	0.00462	0.0156	0.0406
Slc25a3	solute carrier family 25 (mitochondrial carrier, phosphate carrier), member 3	0.45	0.00463	0.0156	0.0406
Bcl11a	B cell CLL/lymphoma 11A (zinc finger protein)	0.54	0.00465	0.0156	0.0406
Irgm1	immunity-related GTPase family M member 1	1.78	0.00465	0.0156	0.0406
Tspan17	tetraspanin 17	0.37	0.00464	0.0156	0.0406
Slc25a37	solute carrier family 25, member 37	2.8	0.00463	0.0156	0.0406
Pcdhb19	protocadherin beta 19	1.8	0.00462	0.0156	0.0406
Zbtb7c	zinc finger and BTB domain containing 7C	2.52	0.00462	0.0156	0.0406
Ndufb11	NADH dehydrogenase (ubiquinone) 1 beta subcomplex, 11	0.27	0.00464	0.0156	0.0406
Gcnt1	glucosaminyl (N-acetyl) transferase 1, core 2	2.38	0.0046	0.0156	0.0405
Tmem28	transmembrane protein 28	0.33	0.0046	0.0156	0.0405
Dpp3	dipeptidylpeptidase 3	0.35	0.00457	0.0155	0.0403
Ppm1l	protein phosphatase 1 (formerly 2C)-like	0.58	0.00457	0.0155	0.0403
Rlbp1	retinaldehyde binding protein 1	0.59	0.00458	0.0155	0.0403
Kcna1	potassium voltage-gated channel, shaker-related subfamily, member 1	0.52	0.00455	0.0154	0.0401
Hist2h2be	histone cluster 2, H2be	1.6	0.00453	0.0154	0.04
Lrrc8c	leucine rich repeat containing 8 family, member C	1.91	0.00451	0.0154	0.0399
Inpp5a	inositol polyphosphate-5-phosphatase A	0.53	0.00452	0.0154	0.0399
Tspan7	tetraspanin 7	0.5	0.00451	0.0154	0.0399
Klhl25	kelch-like 25	0.34	0.00447	0.0153	0.0396
Efcab11	EF-hand calcium binding domain 11	2.82	0.00445	0.0152	0.0394
Ankrd12	ankyrin repeat domain 12	2.24	0.00445	0.0152	0.0394
Fzd2	frizzled homolog 2 (Drosophila)	0.5	0.00443	0.0152	0.0393
Ppm1n	protein phosphatase, Mg2+/Mn2+ dependent, 1N (putative)	1.61	0.00442	0.0151	0.0393
8030423F21Rik	RIKEN cDNA 8030423F21 gene	2.45	0.00441	0.0151	0.0391
Stx7	syntaxin 7	0.66	0.0044	0.015	0.0391
Rabac1	Rab acceptor 1 (prenylated)	0.25	0.00439	0.015	0.0391
Lcp2	lymphocyte cytosolic protein 2	2.18	0.00437	0.015	0.039
Dlgap5	discs, large (Drosophila) homolog-associated protein 5	2.21	0.00438	0.015	0.039
Atrnl1	attractin like 1	0.59	0.00439	0.015	0.039
Rgcc	regulator of cell cycle	1.96	0.00435	0.0149	0.0388
Etv1	ets variant gene 1	1.86	0.00434	0.0149	0.0387
Pex14	peroxisomal biogenesis factor 14	0.41	0.00433	0.0149	0.0387
Arl6ip1	ADP-ribosylation factor-like 6 interacting protein 1	0.65	0.00432	0.0149	0.0386
Adck3	aarF domain containing kinase 3	0.37	0.0043	0.0148	0.0385
Chat	choline acetyltransferase	1.85	0.00429	0.0148	0.0385
C330013J21Rik	RIKEN cDNA C330013J21 gene	3.06	0.00429	0.0148	0.0385
BC028528	cDNA sequence BC028528	2.25	0.0043	0.0148	0.0385
Tspyl1	testis-specific protein, Y-encoded-like 1	0.62	0.00429	0.0148	0.0384
Arvcf	armadillo repeat gene deleted in velo-cardio-facial syndrome	0.54	0.00428	0.0148	0.0384
Ddah2	dimethylarginine dimethylaminohydrolase 2	0.45	0.00429	0.0148	0.0384
Chchd6	coiled-coil-helix-coiled-coil-helix domain containing 6	0.24	0.00428	0.0148	0.0384
Zfp937	zinc finger protein 937	2.15	0.00426	0.0148	0.0383
Vcp	valosin containing protein	0.65	0.00426	0.0148	0.0383
Fam213b	family with sequence similarity 213, member B	0.32	0.00425	0.0148	0.0383
Rbm42	RNA binding motif protein 42	0.4	0.00425	0.0148	0.0383
P2rx7	purinergic receptor P2X, ligand-gated ion channel, 7	2.18	0.00424	0.0147	0.0382
Gtf2h5	general transcription factor IIH, polypeptide 5	0.59	0.00422	0.0147	0.0381
Rbm20	RNA binding motif protein 20	1.86	0.00421	0.0147	0.0381
Gpatch4	G patch domain containing 4	1.52	0.00422	0.0147	0.0381
Arpc1b	actin related protein 2/3 complex, subunit 1B	2.6	0.00421	0.0147	0.0381
Snap23	synaptosomal-associated protein 23	2.44	0.0042	0.0146	0.038
Slfn5	schlafen 5	1.82	0.00418	0.0146	0.0378
Flnb	filamin, beta	2.05	0.00417	0.0145	0.0377
Ehd1	EH-domain containing 1	0.32	0.00416	0.0145	0.0377
Tbx3	T-box 3	0.62	0.00417	0.0145	0.0377
Havcr2	hepatitis A virus cellular receptor 2	2.62	0.00414	0.0145	0.0376
Gm3414	predicted gene 3414	2.07	0.00414	0.0145	0.0376
Hebp2	heme binding protein 2	0.35	0.00413	0.0145	0.0375
Gmpr	guanosine monophosphate reductase	0.35	0.00412	0.0145	0.0375
Anapc2	anaphase promoting complex subunit 2	0.45	0.00413	0.0145	0.0375
Psmf1	proteasome (prosome, macropain) inhibitor subunit 1	0.54	0.00412	0.0145	0.0375
Acot7	acyl-CoA thioesterase 7	0.4	0.00413	0.0145	0.0375
Ndufb7	NADH dehydrogenase (ubiquinone) 1 beta subcomplex, 7	0.26	0.00413	0.0145	0.0375
Grip1	glutamate receptor interacting protein 1	0.61	0.00409	0.0144	0.0373
Socs3	suppressor of cytokine signaling 3	2.34	0.00408	0.0144	0.0373
Mturn	maturin, neural progenitor differentiation regulator homolog (Xenopus)	0.6	0.00408	0.0144	0.0373
Mbnl3	muscleblind-like 3 (Drosophila)	2.19	0.00409	0.0144	0.0373
Mgst3	microsomal glutathione S-transferase 3	0.31	0.00407	0.0143	0.0372
Epha2	Eph receptor A2	2.06	0.00407	0.0143	0.0372
Msrb3	methionine sulfoxide reductase B3	2.25	0.00405	0.0143	0.0371
Ntmt1	N-terminal Xaa-Pro-Lys N-methyltransferase 1	0.35	0.00404	0.0143	0.0371
2810428I15Rik	RIKEN cDNA 2810428I15 gene	0.27	0.00404	0.0143	0.0371
Sbspon	somatomedin B and thrombospondin, type 1 domain containing	0.47	0.00402	0.0142	0.037
Cyc1	cytochrome c-1	0.3	0.00403	0.0142	0.037
Epas1	endothelial PAS domain protein 1	1.92	0.00403	0.0142	0.037
Coa3	cytochrome C oxidase assembly factor 3	0.31	0.004	0.0142	0.0369
Tex15	testis expressed gene 15	2.06	0.00398	0.0141	0.0367
Chrm3	cholinergic receptor, muscarinic 3, cardiac	0.52	0.00396	0.0141	0.0365
Ptdss1	phosphatidylserine synthase 1	0.5	0.00396	0.0141	0.0365
Wisp1	WNT1 inducible signaling pathway protein 1	2.37	0.00395	0.0141	0.0365
Sgpp2	sphingosine-1-phosphate phosphotase 2	1.82	0.00394	0.014	0.0364
Rab5b	RAB5B, member RAS oncogene family	0.6	0.00394	0.014	0.0364
Rsph3a	radial spoke 3A homolog (Chlamydomonas)	0.38	0.00394	0.014	0.0364
9530051G07Rik	RIKEN cDNA 9530051G07 gene	2.27	0.00393	0.014	0.0364
Fhl2	four and a half LIM domains 2	2.38	0.0039	0.0139	0.0362
Flywch2	FLYWCH family member 2	0.37	0.00391	0.0139	0.0362
Pvr	poliovirus receptor	1.73	0.0039	0.0139	0.0362
Tollip	toll interacting protein	0.55	0.00389	0.0139	0.0361
Ctu1	cytosolic thiouridylase subunit 1 homolog (S. pombe)	0.5	0.00387	0.0138	0.0359
Herpud1	homocysteine-inducible, endoplasmic reticulum stress-inducible, ubiquitin-like domain member 1	0.57	0.00386	0.0138	0.0359
Als2cr11	amyotrophic lateral sclerosis 2 (juvenile) chromosome region, candidate 11 (human)	3.14	0.00385	0.0138	0.0358
Prdx2	peroxiredoxin 2	0.37	0.00385	0.0138	0.0358
Got2	glutamate oxaloacetate transaminase 2, mitochondrial	0.38	0.00385	0.0138	0.0358
Gramd2	GRAM domain containing 2	2.36	0.00384	0.0138	0.0358
Gm13830	Derived by automated computational analysis using gene prediction method: Gnomon.	2.01	0.00383	0.0138	0.0357
4930594C11Rik	G1 to S phase transition pseudogene	3.65	0.00381	0.0137	0.0356
S100b	S100 protein, beta polypeptide, neural	0.46	0.00379	0.0137	0.0355
Arl5c	ADP-ribosylation factor-like 5C	0.32	0.00379	0.0137	0.0355
B3gat3	beta-1,3-glucuronyltransferase 3 (glucuronosyltransferase I)	0.37	0.0038	0.0137	0.0355
Papss1	3'-phosphoadenosine 5'-phosphosulfate synthase 1	0.58	0.0038	0.0137	0.0355
Dda1	DET1 and DDB1 associated 1	0.48	0.0038	0.0137	0.0355
Cacng4	calcium channel, voltage-dependent, gamma subunit 4	0.48	0.00377	0.0136	0.0354
Rplp2	ribosomal protein, large P2	0.29	0.00377	0.0136	0.0354
Jag1	jagged 1	2.18	0.00376	0.0136	0.0353
Zfp92	zinc finger protein 92	2.7	0.00376	0.0136	0.0353
Lrfn3	leucine rich repeat and fibronectin type III domain containing 3	0.45	0.00375	0.0136	0.0352
Gm14326	predicted gene 14326	1.84	0.00373	0.0135	0.0351
Igsf8	immunoglobulin superfamily, member 8	0.48	0.00371	0.0135	0.035
Tc2n	tandem C2 domains, nuclear	1.88	0.00372	0.0135	0.035
Fbxl15	F-box and leucine-rich repeat protein 15	0.29	0.00372	0.0135	0.035
Dmrta1	doublesex and mab-3 related transcription factor like family A1	3.2	0.00371	0.0135	0.035
Sepw1	selenoprotein W, muscle 1	0.36	0.00372	0.0135	0.035
Bin2	bridging integrator 2	2.02	0.0037	0.0134	0.0349
Arl2	ADP-ribosylation factor-like 2	0.31	0.0037	0.0134	0.0349
Lrat	lecithin-retinol acyltransferase (phosphatidylcholine-retinol-O-acyltransferase)	2.58	0.00368	0.0134	0.0348
Necab2	N-terminal EF-hand calcium binding protein 2	0.37	0.00368	0.0134	0.0348
Sgk3	serum/glucocorticoid regulated kinase 3	1.78	0.00367	0.0134	0.0347
Rps15	ribosomal protein S15	0.24	0.00364	0.0133	0.0345
Ykt6	YKT6 homolog (S. Cerevisiae)	0.64	0.00364	0.0133	0.0345
Ahr	aryl-hydrocarbon receptor	2.22	0.00364	0.0133	0.0345
C330006A16Rik	RIKEN cDNA C330006A16 gene	1.56	0.00363	0.0133	0.0345
Ctsc	cathepsin C	2	0.00364	0.0133	0.0345
Atp6v0d1	ATPase, H+ transporting, lysosomal V0 subunit D1	0.3	0.00362	0.0133	0.0344
Tal1	T cell acute lymphocytic leukemia 1	2.4	0.0036	0.0132	0.0343
Cdk6	cyclin-dependent kinase 6	2.4	0.00361	0.0132	0.0343
Mecom	MDS1 and EVI1 complex locus	2.57	0.00359	0.0132	0.0342
Npas3	neuronal PAS domain protein 3	1.88	0.00356	0.0131	0.034
Xkr6	X Kell blood group precursor related family member 6 homolog	1.74	0.00356	0.0131	0.034
Pld3	phospholipase D family, member 3	0.42	0.00356	0.0131	0.034
Cxx1a	CAAX box 1A	0.46	0.00356	0.0131	0.034
Scx	scleraxis	0.29	0.00354	0.013	0.0338
1700025N23Rik	RIKEN cDNA 1700025N23 gene	3.39	0.00353	0.013	0.0337
Commd1	COMM domain containing 1	0.43	0.00351	0.013	0.0336
Nrg2	neuregulin 2	0.45	0.00351	0.013	0.0336
Ddx58	DEAD (Asp-Glu-Ala-Asp) box polypeptide 58	1.74	0.00351	0.013	0.0336
Kcnd2	potassium voltage-gated channel, Shal-related family, member 2	0.37	0.00349	0.0129	0.0335
Wasf1	WAS protein family, member 1	0.65	0.00348	0.0129	0.0334
Src	Rous sarcoma oncogene	0.6	0.00348	0.0129	0.0334
Prdx5	peroxiredoxin 5	0.28	0.00346	0.0128	0.0333
Ets1	E26 avian leukemia oncogene 1, 5' domain	2.13	0.00346	0.0128	0.0333
Ly96	lymphocyte antigen 96	2.84	0.00344	0.0128	0.0332
Tesk1	testis specific protein kinase 1	0.54	0.00344	0.0128	0.0332
Grb14	growth factor receptor bound protein 14	0.6	0.00343	0.0128	0.0331
Sars	seryl-aminoacyl-tRNA synthetase	0.39	0.00343	0.0128	0.0331
1700007J10Rik	RIKEN cDNA 1700007J10 gene	2.08	0.00342	0.0127	0.0331
Plau	plasminogen activator, urokinase	3.78	0.00342	0.0127	0.0331
Fignl1	fidgetin-like 1	1.82	0.00341	0.0127	0.033
Tango2	transport and golgi organization 2	0.41	0.0034	0.0127	0.033
C130080G10Rik	RIKEN cDNA C130080G10 gene	2.33	0.00339	0.0127	0.0329
Ube2m	ubiquitin-conjugating enzyme E2M	0.34	0.00337	0.0126	0.0328
Pgbd5	piggyBac transposable element derived 5	0.62	0.00337	0.0126	0.0328
Agt	angiotensinogen (serpin peptidase inhibitor, clade A, member 8)	0.36	0.00338	0.0126	0.0328
Tsc22d3	TSC22 domain family, member 3	0.6	0.00338	0.0126	0.0328
Scn7a	sodium channel, voltage-gated, type VII, alpha	2.44	0.00336	0.0126	0.0327
Atp10a	ATPase, class V, type 10A	2.25	0.00336	0.0126	0.0327
Hhex	hematopoietically expressed homeobox	2.41	0.00334	0.0126	0.0326
Tssc1	tumor suppressing subtransferable candidate 1	0.36	0.00334	0.0125	0.0326
Nqo2	NAD(P)H dehydrogenase, quinone 2	1.55	0.00332	0.0125	0.0325
Cmklr1	chemokine-like receptor 1	2.71	0.00333	0.0125	0.0325
Gstm7	glutathione S-transferase, mu 7	0.55	0.00331	0.0125	0.0323
Gp1bb	glycoprotein Ib, beta polypeptide	0.46	0.0033	0.0124	0.0323
Kcnip2	Kv channel-interacting protein 2	0.44	0.0033	0.0124	0.0323
Eif1b	eukaryotic translation initiation factor 1B	0.41	0.0033	0.0124	0.0323
Stambpl1	STAM binding protein like 1	0.48	0.00327	0.0124	0.0321
Fam181b	family with sequence similarity 181, member B	0.32	0.00328	0.0124	0.0321
Flt4	FMS-like tyrosine kinase 4	2.25	0.00326	0.0123	0.032
Csf2rb	colony stimulating factor 2 receptor, beta, low-affinity (granulocyte-macrophage)	2.96	0.00325	0.0123	0.032
5930430L01Rik	RIKEN cDNA 5930430L01 gene	2	0.00326	0.0123	0.032
Zfp428	zinc finger protein 428	0.38	0.00325	0.0123	0.032
Gpr12	G-protein coupled receptor 12	0.27	0.00324	0.0123	0.0319
F10	coagulation factor X	3.47	0.00323	0.0123	0.0319
Rgs8	regulator of G-protein signaling 8	0.58	0.00321	0.0122	0.0317
Zfp804b	zinc finger protein 804B	3.14	0.00321	0.0122	0.0317
Klkb1	kallikrein B, plasma 1	3.37	0.00321	0.0122	0.0317
Zfp459	zinc finger protein 459	2.87	0.00317	0.0121	0.0315
Ddx11	DEAD/H (Asp-Glu-Ala-Asp/His) box helicase 11	1.91	0.00318	0.0121	0.0315
Snx21	sorting nexin family member 21	0.34	0.00319	0.0121	0.0315
Smim19	small integral membrane protein 19	0.64	0.00319	0.0121	0.0315
Irf9	interferon regulatory factor 9	1.92	0.00317	0.0121	0.0314
Manbal	mannosidase, beta A, lysosomal-like	0.45	0.00317	0.0121	0.0314
Slc35d2	solute carrier family 35, member D2	3.24	0.00315	0.0121	0.0313
Homer2	homer homolog 2 (Drosophila)	0.66	0.00316	0.0121	0.0313
Dusp26	dual specificity phosphatase 26 (putative)	0.4	0.00315	0.0121	0.0313
Nrp1	neuropilin 1	1.62	0.00313	0.012	0.0312
Poldip2	polymerase (DNA-directed), delta interacting protein 2	0.39	0.00312	0.012	0.0311
Sh2b3	SH2B adaptor protein 3	2	0.00311	0.012	0.0311
Brwd3	bromodomain and WD repeat domain containing 3	2.26	0.00311	0.012	0.031
Cpne8	copine VIII	0.64	0.0031	0.0119	0.031
Ccdc32	coiled-coil domain containing 32	0.45	0.00309	0.0119	0.031
Zbtb45	zinc finger and BTB domain containing 45	0.56	0.00309	0.0119	0.0309
Ank1	ankyrin 1, erythroid	0.59	0.00309	0.0119	0.0309
Pgr	progesterone receptor	0.36	0.00307	0.0119	0.0308
Lepr	leptin receptor	1.89	0.00306	0.0118	0.0307
Rps3	ribosomal protein S3	0.23	0.00304	0.0118	0.0305
Cmtm8	CKLF-like MARVEL transmembrane domain containing 8	0.53	0.00304	0.0118	0.0305
Elmo1	engulfment and cell motility 1	0.63	0.00303	0.0117	0.0305
Mpv17l	Mpv17 transgene, kidney disease mutant-like	1.59	0.00303	0.0117	0.0305
Arhgap1	Rho GTPase activating protein 1	0.56	0.00302	0.0117	0.0304
Ap1m1	adaptor-related protein complex AP-1, mu subunit 1	0.44	0.00302	0.0117	0.0304
Nkain2	Na+/K+ transporting ATPase interacting 2	0.32	0.003	0.0117	0.0303
Pde1b	phosphodiesterase 1B, Ca2+-calmodulin dependent	0.59	0.003	0.0117	0.0303
Ppapdc3	phosphatidic acid phosphatase type 2 domain containing 3	0.41	0.00301	0.0117	0.0303
Map1lc3b	microtubule-associated protein 1 light chain 3 beta	0.42	0.00301	0.0117	0.0303
Col4a2	collagen, type IV, alpha 2	2.57	0.00299	0.0116	0.0302
Wars2	tryptophanyl tRNA synthetase 2 (mitochondrial)	1.62	0.00298	0.0116	0.0301
Gdap1l1	ganglioside-induced differentiation-associated protein 1-like 1	0.39	0.00296	0.0116	0.03
Ccdc18	coiled-coil domain containing 18	2.33	0.00296	0.0116	0.03
Rbm15b	RNA binding motif protein 15B	0.64	0.00297	0.0116	0.03
Pla2g4a	phospholipase A2, group IVA (cytosolic, calcium-dependent)	2.65	0.00294	0.0115	0.0299
Epm2a	epilepsy, progressive myoclonic epilepsy, type 2 gene alpha	0.56	0.00294	0.0115	0.0299
Cyfip2	cytoplasmic FMR1 interacting protein 2	0.64	0.00294	0.0115	0.0299
2310039H08Rik	RIKEN cDNA 2310039H08 gene	0.26	0.00291	0.0114	0.0295
AW551984	expressed sequence AW551984	0.47	0.0029	0.0114	0.0295
Tmem204	transmembrane protein 204	2.37	0.00288	0.0113	0.0294
Stard13	StAR-related lipid transfer (START) domain containing 13	1.83	0.00289	0.0113	0.0294
2310036O22Rik	RIKEN cDNA 2310036O22 gene	2.13	0.00288	0.0113	0.0293
Cd72	CD72 antigen	2.35	0.00286	0.0113	0.0292
Neurod2	neurogenic differentiation 2	0.57	0.00285	0.0112	0.0291
Hes6	hairy and enhancer of split 6	0.47	0.00284	0.0112	0.029
Prdx6	peroxiredoxin 6	0.44	0.00281	0.0112	0.029
Btbd2	BTB (POZ) domain containing 2	0.39	0.00283	0.0112	0.029
Chd3os	chromodomain helicase DNA binding protein 3, opposite strand	0.56	0.00282	0.0112	0.029
Limd2	LIM domain containing 2	0.41	0.00283	0.0112	0.029
Tdp1	tyrosyl-DNA phosphodiesterase 1	0.58	0.00281	0.0112	0.029
Lect1	leukocyte cell derived chemotaxin 1	1.96	0.00282	0.0112	0.029
Spry2	sprouty homolog 2 (Drosophila)	1.57	0.00281	0.0112	0.029
Cstad	CSA-conditional, T cell activation-dependent protein	3.2	0.00282	0.0112	0.029
Hpse	heparanase	0.26	0.00283	0.0112	0.029
Mn1	meningioma 1	0.43	0.00282	0.0112	0.029
Me3	malic enzyme 3, NADP(+)-dependent, mitochondrial	0.44	0.00284	0.0112	0.029
Deaf1	deformed epidermal autoregulatory factor 1 (Drosophila)	0.53	0.00282	0.0112	0.029
Ppp1r35	protein phosphatase 1, regulatory subunit 35	0.27	0.0028	0.0111	0.0289
Cerkl	ceramide kinase-like	2.63	0.00279	0.0111	0.0288
AI854703	expressed sequence AI854703	0.42	0.00277	0.011	0.0286
Klhl13	kelch-like 13	0.64	0.00277	0.011	0.0286
Tmem245	transmembrane protein 245	2.18	0.00275	0.011	0.0285
Pbk	PDZ binding kinase	2.9	0.00274	0.0109	0.0284
Mapk3	mitogen-activated protein kinase 3	0.35	0.00274	0.0109	0.0284
Plekhd1	pleckstrin homology domain containing, family D (with coiled-coil domains) member 1	0.64	0.00273	0.0109	0.0283
Ppp1r14b	protein phosphatase 1, regulatory (inhibitor) subunit 14B	0.39	0.00273	0.0109	0.0283
Gm21119	predicted gene, 21119	7.24	0.00272	0.0109	0.0283
Zfp426	zinc finger protein 426	1.96	0.00273	0.0109	0.0283
Narf	nuclear prelamin A recognition factor	0.66	0.0027	0.0109	0.0282
Evl	Ena-vasodilator stimulated phosphoprotein	0.51	0.00271	0.0109	0.0282
Hip1r	huntingtin interacting protein 1 related	0.46	0.00271	0.0109	0.0282
Prrt3	proline-rich transmembrane protein 3	0.4	0.00271	0.0109	0.0282
Kctd20	potassium channel tetramerisation domain containing 20	0.64	0.0027	0.0108	0.0282
Zfp575	zinc finger protein 575	0.53	0.0027	0.0108	0.0282
Frat1	frequently rearranged in advanced T cell lymphomas	0.63	0.00268	0.0108	0.0281
Mrps12	mitochondrial ribosomal protein S12	0.37	0.00266	0.0107	0.0279
Yeats4	YEATS domain containing 4	0.53	0.00265	0.0107	0.0278
Elfn1	leucine rich repeat and fibronectin type III, extracellular 1	1.58	0.00265	0.0107	0.0278
Slc27a4	solute carrier family 27 (fatty acid transporter), member 4	0.41	0.00264	0.0107	0.0277
Glis3	GLIS family zinc finger 3	2.75	0.00262	0.0106	0.0276
Entpd2	ectonucleoside triphosphate diphosphohydrolase 2	0.47	0.00263	0.0106	0.0276
Mapk8ip1	mitogen-activated protein kinase 8 interacting protein 1	0.42	0.00263	0.0106	0.0276
Htr1d	5-hydroxytryptamine (serotonin) receptor 1D	0.4	0.00263	0.0106	0.0276
Galnt18	UDP-N-acetyl-alpha-D-galactosamine:polypeptide N-acetylgalactosaminyltransferase 18	0.47	0.00263	0.0106	0.0276
Htr1a	5-hydroxytryptamine (serotonin) receptor 1A	0.33	0.00261	0.0106	0.0275
Gm15645	predicted gene 15645	3.16	0.0026	0.0105	0.0274
Anks1b	ankyrin repeat and sterile alpha motif domain containing 1B	0.51	0.00257	0.0105	0.0272
Abhd15	abhydrolase domain containing 15	3.55	0.00256	0.0104	0.0271
Cygb	cytoglobin	0.45	0.00256	0.0104	0.027
Rag1	recombination activating gene 1	0.31	0.00256	0.0104	0.027
Khdrbs2	KH domain containing, RNA binding, signal transduction associated 2	0.53	0.00254	0.0103	0.0269
Sepp1	selenoprotein P, plasma, 1	0.57	0.00253	0.0103	0.0268
Kif14	kinesin family member 14	3.01	0.00252	0.0103	0.0267
Hcfc1r1	host cell factor C1 regulator 1 (XPO1-dependent)	0.47	0.00251	0.0103	0.0267
Trpc4ap	transient receptor potential cation channel, subfamily C, member 4 associated protein	0.51	0.00251	0.0103	0.0267
Ralyl	RALY RNA binding protein-like	0.59	0.00251	0.0103	0.0267
Ptar1	protein prenyltransferase alpha subunit repeat containing 1	2.67	0.0025	0.0102	0.0266
Eif1	eukaryotic translation initiation factor 1	0.6	0.00248	0.0102	0.0264
Wars	tryptophanyl-tRNA synthetase	0.39	0.00248	0.0102	0.0264
Ccdc25	coiled-coil domain containing 25	1.8	0.00247	0.0102	0.0264
Fam134b	family with sequence similarity 134, member B	0.61	0.00247	0.0102	0.0264
9330102E08Rik	RIKEN cDNA 9330102E08 gene	1.82	0.00248	0.0102	0.0264
Itgb8	integrin beta 8	2.53	0.00246	0.0101	0.0263
Smc2	structural maintenance of chromosomes 2	2.12	0.00246	0.0101	0.0263
Aldoc	aldolase C, fructose-bisphosphate	0.39	0.00245	0.0101	0.0262
Mgat5b	mannoside acetylglucosaminyltransferase 5, isoenzyme B	0.54	0.00244	0.0101	0.0261
Tmem184b	transmembrane protein 184b	1.92	0.00242	0.01	0.0259
Tmem41a	transmembrane protein 41a	0.52	0.00242	0.00999	0.0259
Slc39a3	solute carrier family 39 (zinc transporter), member 3	0.47	0.0024	0.00993	0.0258
Pgp	phosphoglycolate phosphatase	0.45	0.00239	0.0099	0.0257
Commd9	COMM domain containing 9	0.3	0.00238	0.00988	0.0256
Tmem240	transmembrane protein 240	0.34	0.00237	0.00985	0.0256
B3galnt1	UDP-GalNAc:betaGlcNAc beta 1,3-galactosaminyltransferase, polypeptide 1	0.6	0.00235	0.00977	0.0254
AY074887	cDNA sequence AY074887	2.9	0.00235	0.00976	0.0253
Arhgap18	Rho GTPase activating protein 18	1.92	0.00234	0.00972	0.0252
Gpr26	G protein-coupled receptor 26	0.32	0.00234	0.00972	0.0252
Ndst4	N-deacetylase/N-sulfotransferase (heparin glucosaminyl) 4	0.28	0.00232	0.00969	0.0251
Tbx21	T-box 21	0.27	0.00232	0.00968	0.0251
Mrpl34	mitochondrial ribosomal protein L34	0.35	0.00232	0.00968	0.0251
Fam160a1	family with sequence similarity 160, member A1	1.63	0.00231	0.00967	0.0251
Ago3	argonaute RISC catalytic subunit 3	3	0.00231	0.00966	0.0251
Fis1	fission 1 (mitochondrial outer membrane) homolog (yeast)	0.25	0.0023	0.00962	0.025
Lrrc4b	leucine rich repeat containing 4B	0.57	0.0023	0.00962	0.025
Apba2	amyloid beta (A4) precursor protein-binding, family A, member 2	0.66	0.0023	0.00962	0.025
Creb5	cAMP responsive element binding protein 5	2.97	0.00229	0.00959	0.0249
Cdk1	cyclin-dependent kinase 1	2.78	0.00228	0.00955	0.0248
Crygs	crystallin, gamma S	0.18	0.00227	0.00955	0.0248
Cnr2	cannabinoid receptor 2 (macrophage)	4	0.00227	0.00955	0.0248
Fam20c	family with sequence similarity 20, member C	0.51	0.00227	0.00955	0.0248
Praf2	PRA1 domain family 2	0.47	0.00227	0.00954	0.0248
March9	membrane-associated ring finger (C3HC4) 9	0.5	0.00225	0.00949	0.0246
Kcnab1	potassium voltage-gated channel, shaker-related subfamily, beta member 1	0.52	0.00224	0.00947	0.0246
Ppp2cb	protein phosphatase 2 (formerly 2A), catalytic subunit, beta isoform	0.6	0.00224	0.00946	0.0246
Pde4d	phosphodiesterase 4D, cAMP specific	0.65	0.00224	0.00945	0.0245
Parp14	poly (ADP-ribose) polymerase family, member 14	2.15	0.00223	0.00945	0.0245
Zdhhc14	zinc finger, DHHC domain containing 14	0.59	0.00223	0.00943	0.0245
Apobec1	apolipoprotein B mRNA editing enzyme, catalytic polypeptide 1	1.96	0.00222	0.00941	0.0244
AU023762	expressed sequence AU023762	4.15	0.00222	0.00941	0.0244
Vstm5	V-set and transmembrane domain containing 5	0.43	0.00221	0.00938	0.0243
BC025920	zinc finger protein pseudogene	1.84	0.00219	0.00931	0.0242
Pebp1	phosphatidylethanolamine binding protein 1	0.29	0.00219	0.0093	0.0241
Dctn2	dynactin 2	0.37	0.00218	0.00927	0.0241
Dtl	denticleless homolog (Drosophila)	3.79	0.00217	0.00925	0.024
Smoc1	SPARC related modular calcium binding 1	0.39	0.00218	0.00925	0.024
Zfp637	zinc finger protein 637	0.44	0.00217	0.00925	0.024
Nudt14	nudix (nucleoside diphosphate linked moiety X)-type motif 14	0.24	0.00214	0.00914	0.0237
Txnrd2	thioredoxin reductase 2	0.5	0.00214	0.00914	0.0237
Aldoa	aldolase A, fructose-bisphosphate	0.31	0.00214	0.00912	0.0237
Npnt	nephronectin	0.62	0.00213	0.00911	0.0237
Lpar6	lysophosphatidic acid receptor 6	2.34	0.00213	0.0091	0.0236
Kif11	kinesin family member 11	2.44	0.00212	0.00909	0.0236
Vps25	vacuolar protein sorting 25 (yeast)	0.36	0.00212	0.00908	0.0236
Calb1	calbindin 1	0.46	0.00211	0.00903	0.0235
Tppp3	tubulin polymerization-promoting protein family member 3	0.23	0.0021	0.00902	0.0234
Pfkl	phosphofructokinase, liver, B-type	0.42	0.00208	0.00895	0.0232
Six2	sine oculis-related homeobox 2	0.28	0.00208	0.00895	0.0232
Bhlhe22	basic helix-loop-helix family, member e22	0.46	0.00206	0.00884	0.023
Tmem177	transmembrane protein 177	0.42	0.00205	0.00883	0.0229
Crp	C-reactive protein, pentraxin-related	3.66	0.00204	0.00882	0.0229
Dapk3	death-associated protein kinase 3	0.29	0.00204	0.00882	0.0229
Tmem223	transmembrane protein 223	0.36	0.00205	0.00882	0.0229
Tsen34	tRNA splicing endonuclease 34 homolog (S. cerevisiae)	0.32	0.00205	0.00882	0.0229
Fgf18	fibroblast growth factor 18	0.33	0.00204	0.00881	0.0229
Rassf7	Ras association (RalGDS/AF-6) domain family (N-terminal) member 7	0.24	0.00203	0.0088	0.0229
Gata2	GATA binding protein 2	4.74	0.00203	0.00879	0.0228
Natd1	predicted gene, Gm16515	0.61	0.00202	0.00876	0.0228
Ginm1	glycoprotein integral membrane 1	1.87	0.00202	0.00875	0.0227
Tlr3	toll-like receptor 3	2.5	0.00201	0.00873	0.0227
Lppr3	cDNA sequence BC005764	0.54	0.002	0.00871	0.0226
Hmga1	high mobility group AT-hook 1	0.31	0.00197	0.00858	0.0223
BC052040	cDNA sequence BC052040	0.57	0.00196	0.00853	0.0222
Pla2g2d	phospholipase A2, group IID	2.51	0.00196	0.00853	0.0222
Hmgb2	high mobility group box 2	1.95	0.00195	0.00852	0.0221
Mgat4b	mannoside acetylglucosaminyltransferase 4, isoenzyme B	0.47	0.00194	0.00845	0.0219
Zfand3	zinc finger, AN1-type domain 3	0.58	0.00193	0.00845	0.0219
Lrrc3b	leucine rich repeat containing 3B	0.33	0.00193	0.00842	0.0219
Ftl1	ferritin light chain 1	0.35	0.00193	0.00842	0.0219
Kcnj11	potassium inwardly rectifying channel, subfamily J, member 11	0.4	0.00193	0.00842	0.0219
Sncb	synuclein, beta	0.39	0.00192	0.00841	0.0218
Hspa1a	heat shock protein 1A	0.45	0.00192	0.0084	0.0218
Prtg	protogenin homolog (Gallus gallus)	2.95	0.00191	0.0084	0.0218
Zscan2	zinc finger and SCAN domain containing 2	0.44	0.00191	0.00838	0.0218
Efnb1	ephrin B1	0.53	0.0019	0.00835	0.0217
Fbxo44	F-box protein 44	0.47	0.00189	0.00833	0.0216
Reep1	receptor accessory protein 1	0.58	0.00189	0.00833	0.0216
Myc	myelocytomatosis oncogene	2.63	0.00188	0.00831	0.0216
Nme7	NME/NM23 family member 7	0.59	0.00188	0.00829	0.0215
Ccsap	centriole, cilia and spindle associated protein	0.55	0.00188	0.00829	0.0215
Cbr1	carbonyl reductase 1	0.44	0.00187	0.00826	0.0214
Ripk1	receptor (TNFRSF)-interacting serine-threonine kinase 1	1.8	0.00186	0.00823	0.0214
Apof	apolipoprotein F	3.03	0.00185	0.0082	0.0213
Derl1	Der1-like domain family, member 1	0.52	0.00185	0.0082	0.0213
Alg9	asparagine-linked glycosylation 9 (alpha 1,2 mannosyltransferase)	0.54	0.00185	0.0082	0.0213
Oacyl	O-acyltransferase like	4.63	0.00183	0.00813	0.0211
Prkcq	protein kinase C, theta	0.58	0.00183	0.00813	0.0211
Rhof	ras homolog gene family, member f	0.4	0.00183	0.00813	0.0211
Ckb	creatine kinase, brain	0.41	0.00182	0.00812	0.0211
Rnf182	ring finger protein 182	0.49	0.00182	0.0081	0.021
Ndc80	NDC80 homolog, kinetochore complex component (S. cerevisiae)	3.15	0.00182	0.0081	0.021
Bend6	BEN domain containing 6	0.49	0.00181	0.00807	0.021
Ifngr2	interferon gamma receptor 2	0.55	0.0018	0.00805	0.0209
Slc35g1	solute carrier family 35, member G1	2.55	0.0018	0.00805	0.0209
Spon2	spondin 2, extracellular matrix protein	0.38	0.0018	0.00805	0.0209
Myh9	myosin, heavy polypeptide 9, non-muscle	1.98	0.00179	0.008	0.0208
BC005561	cDNA sequence BC005561	2.73	0.00178	0.00799	0.0207
Lrrtm3	leucine rich repeat transmembrane neuronal 3	0.58	0.00178	0.00798	0.0207
Bhlhe23	basic helix-loop-helix family, member e23	0.47	0.00176	0.0079	0.0205
Pde3b	phosphodiesterase 3B, cGMP-inhibited	2.7	0.00175	0.00786	0.0204
Asic4	acid-sensing (proton-gated) ion channel family member 4	0.65	0.00174	0.00783	0.0203
Zc3hc1	zinc finger, C3HC type 1	0.34	0.00174	0.00783	0.0203
Prkag3	protein kinase, AMP-activated, gamma 3 non-catatlytic subunit	3.79	0.00173	0.00779	0.0202
Lamb1	laminin B1	2.08	0.00173	0.00779	0.0202
Upk3b	uroplakin 3B	0.16	0.00173	0.00779	0.0202
Nfil3	nuclear factor, interleukin 3, regulated	0.5	0.00172	0.00777	0.0202
Cdc42se2	CDC42 small effector 2	0.65	0.0017	0.00772	0.02
Synpr	synaptoporin	0.63	0.00171	0.00772	0.02
Fermt2	fermitin family homolog 2 (Drosophila)	1.71	0.0017	0.00772	0.02
Pls3	plastin 3 (T-isoform)	1.79	0.00171	0.00772	0.02
Gpr153	G protein-coupled receptor 153	0.56	0.0017	0.00769	0.02
Bmyc	brain expressed myelocytomatosis oncogene	0.44	0.00169	0.00765	0.0199
Rnf144b	ring finger protein 144B	2.3	0.00168	0.00763	0.0198
Gpr149	G protein-coupled receptor 149	0.37	0.00167	0.00757	0.0197
Nid2	nidogen 2	2.41	0.00166	0.00757	0.0196
9330136K24Rik	RIKEN cDNA 9330136K24 gene	2.47	0.00166	0.00756	0.0196
Gpr39	G protein-coupled receptor 39	0.24	0.00165	0.00751	0.0195
Tmem206	transmembrane protein 206	1.89	0.00164	0.00751	0.0195
Kif2c	kinesin family member 2C	2.73	0.00164	0.0075	0.0195
Il17d	interleukin 17D	0.54	0.00164	0.00749	0.0194
Sntb2	syntrophin, basic 2	2.14	0.00164	0.00749	0.0194
Nxph3	neurexophilin 3	0.32	0.00163	0.00747	0.0194
F830016B08Rik	RIKEN cDNA F830016B08 gene	4.23	0.00163	0.00747	0.0194
L1cam	L1 cell adhesion molecule	0.53	0.00163	0.00746	0.0194
Kcnj2	potassium inwardly-rectifying channel, subfamily J, member 2	2.7	0.00161	0.00738	0.0192
Col4a3	collagen, type IV, alpha 3	2.36	0.0016	0.00736	0.0191
Ttc39aos1	Derived by automated computational analysis using gene prediction method: Gnomon.	2.14	0.0016	0.00736	0.0191
Rtn2	reticulon 2 (Z-band associated protein)	0.28	0.0016	0.00736	0.0191
Ednra	endothelin receptor type A	0.39	0.0016	0.00736	0.0191
Gm5176	high mobility group box 2 pseudogene	2.28	0.00159	0.00734	0.0191
Sntg1	syntrophin, gamma 1	0.46	0.00158	0.00729	0.0189
Plxdc1	plexin domain containing 1	0.34	0.00158	0.00729	0.0189
Ppp2r5b	protein phosphatase 2, regulatory subunit B', beta	0.37	0.00158	0.00729	0.0189
BC030500	cDNA sequence BC030500	0.39	0.00158	0.00729	0.0189
4930512M02Rik	RIKEN cDNA 4930512M02 gene	4.47	0.00157	0.00728	0.0189
Adck1	aarF domain containing kinase 1	0.45	0.00157	0.00728	0.0189
1700001L19Rik	RIKEN cDNA 1700001L19 gene	0.25	0.00157	0.00727	0.0189
Arpc1a	actin related protein 2/3 complex, subunit 1A	0.56	0.00156	0.00724	0.0188
Map6	microtubule-associated protein 6	0.65	0.00156	0.00724	0.0188
Calm3	calmodulin 3	0.44	0.00155	0.00723	0.0188
Cers4	ceramide synthase 4	1.61	0.00155	0.00722	0.0187
Sqstm1	sequestosome 1	0.44	0.00154	0.00719	0.0187
Il2rg	interleukin 2 receptor, gamma chain	2.8	0.00154	0.00718	0.0186
Actr1a	ARP1 actin-related protein 1A, centractin alpha	0.41	0.00153	0.00714	0.0185
Zc3h7b	zinc finger CCCH type containing 7B	0.67	0.00152	0.00713	0.0185
Tfap2b	transcription factor AP-2 beta	0.59	0.00151	0.00708	0.0184
Cers1	ceramide synthase 1	0.48	0.00151	0.00706	0.0183
Pygb	brain glycogen phosphorylase	0.51	0.0015	0.00705	0.0183
Trp53i11	transformation related protein 53 inducible protein 11	0.49	0.00149	0.00702	0.0182
Mkrn1	makorin, ring finger protein, 1	0.48	0.0015	0.00702	0.0182
Casp6	caspase 6	0.62	0.00149	0.00698	0.0181
Ap1s1	adaptor protein complex AP-1, sigma 1	0.37	0.00149	0.00698	0.0181
Ankrd45	ankyrin repeat domain 45	0.45	0.00147	0.00694	0.018
Acat2	acetyl-Coenzyme A acetyltransferase 2	0.49	0.00147	0.00694	0.018
Qdpr	quinoid dihydropteridine reductase	0.42	0.00147	0.00694	0.018
Ctxn3	cortexin 3	0.31	0.00146	0.00689	0.0179
Snhg8	small nucleolar RNA host gene 8	0.47	0.00146	0.00689	0.0179
Stmn1-rs1	stathmin 1, related sequence 1	0.32	0.00146	0.00689	0.0179
Tspyl4	TSPY-like 4	0.63	0.00145	0.00688	0.0179
Kif20b	kinesin family member 20B	3.24	0.00145	0.00685	0.0178
Slx1b	SLX1 structure-specific endonuclease subunit homolog B (S. cerevisiae)	1.82	0.00144	0.00683	0.0177
Ly6e	lymphocyte antigen 6 complex, locus E	0.44	0.00143	0.0068	0.0177
Ctbs	chitobiase, di-N-acetyl-	1.96	0.00143	0.00679	0.0176
Brsk1	BR serine/threonine kinase 1	0.51	0.00143	0.00679	0.0176
Mtus2	microtubule associated tumor suppressor candidate 2	0.58	0.00143	0.00678	0.0176
Ddr2	discoidin domain receptor family, member 2	2.9	0.0014	0.00668	0.0173
Cast	calpastatin	1.73	0.0014	0.00668	0.0173
Crygf	crystallin, gamma F	0.16	0.00139	0.00663	0.0172
Sh2b2	SH2B adaptor protein 2	0.44	0.00138	0.00661	0.0172
Nrgn	neurogranin	0.43	0.00136	0.00648	0.0168
Maged1	melanoma antigen, family D, 1	0.48	0.00135	0.00648	0.0168
Susd4	sushi domain containing 4	0.55	0.00135	0.00647	0.0168
Mybl2	myeloblastosis oncogene-like 2	2.26	0.00135	0.00647	0.0168
Gm16287	predicted gene 16287	2.51	0.00135	0.00647	0.0168
Rec8	REC8 homolog (yeast)	0.44	0.00135	0.00646	0.0168
Rrp1b	ribosomal RNA processing 1 homolog B (S. cerevisiae)	1.69	0.00134	0.00646	0.0168
Bri3bp	Bri3 binding protein	0.63	0.00134	0.00646	0.0168
Lnpep	leucyl/cystinyl aminopeptidase	2.85	0.00134	0.00644	0.0167
Ifih1	interferon induced with helicase C domain 1	1.92	0.00133	0.00643	0.0167
Rbfox3	RNA binding protein, fox-1 homolog (C. elegans) 3	0.45	0.00132	0.00636	0.0165
Tnfrsf13c	tumor necrosis factor receptor superfamily, member 13c	3.04	0.00131	0.00631	0.0164
Nr4a1	nuclear receptor subfamily 4, group A, member 1	2.28	0.0013	0.00629	0.0163
H1fx	H1 histone family, member X	0.41	0.00129	0.00625	0.0162
Gucy2f	guanylate cyclase 2f	2.48	0.00129	0.00624	0.0162
Micu1	mitochondrial calcium uptake 1	0.35	0.00129	0.00623	0.0162
Zdhhc22	zinc finger, DHHC-type containing 22	0.33	0.00129	0.00623	0.0162
Kcnf1	potassium voltage-gated channel, subfamily F, member 1	0.36	0.00128	0.00621	0.0161
Gabbr1	gamma-aminobutyric acid (GABA) B receptor, 1	0.65	0.00128	0.00621	0.0161
C3	complement component 3	3.3	0.00128	0.00621	0.0161
Fgf1	fibroblast growth factor 1	0.44	0.00128	0.00621	0.0161
Rell1	RELT-like 1	2.39	0.00127	0.00621	0.0161
Gfod2	glucose-fructose oxidoreductase domain containing 2	0.5	0.00127	0.00621	0.0161
Tceal5	transcription elongation factor A (SII)-like 5	0.61	0.00128	0.00621	0.0161
Hn1	hematological and neurological expressed sequence 1	0.4	0.00126	0.00616	0.016
Emc10	ER membrane protein complex subunit 10	0.4	0.00124	0.00606	0.0157
Ankrd13b	ankyrin repeat domain 13b	0.59	0.00123	0.00603	0.0157
Rps7	ribosomal protein S7	0.34	0.00122	0.00598	0.0155
Fbll1	fibrillarin-like 1	0.3	0.00122	0.00597	0.0155
Fasn	fatty acid synthase	0.59	0.00121	0.00597	0.0155
Rnf207	ring finger protein 207	2.8	0.0012	0.00593	0.0154
Fam220a	family with sequence similarity 220, member A	0.44	0.0012	0.00592	0.0154
Atp6v1g2	ATPase, H+ transporting, lysosomal V1 subunit G2	0.61	0.0012	0.00591	0.0153
Ppp1r3d	protein phosphatase 1, regulatory subunit 3D	0.46	0.0012	0.00591	0.0153
Cklf	chemokine-like factor	2.18	0.0012	0.00591	0.0153
Dfna5	deafness, autosomal dominant 5 (human)	0.48	0.00119	0.00587	0.0152
Rab3c	RAB3C, member RAS oncogene family	0.5	0.00118	0.00586	0.0152
Ldb1	LIM domain binding 1	0.58	0.00118	0.00584	0.0152
Trnp1	TMF1-regulated nuclear protein 1	0.65	0.00118	0.00584	0.0152
Lnx1	ligand of numb-protein X 1	0.62	0.00118	0.00584	0.0152
Gm16793	predicted gene, 16793	2.34	0.00118	0.00584	0.0152
St14	suppression of tumorigenicity 14 (colon carcinoma)	0.28	0.00118	0.00584	0.0152
H2-Q7	histocompatibility 2, Q region locus 7	0.3	0.00117	0.00583	0.0151
Arpp21	cyclic AMP-regulated phosphoprotein, 21	0.5	0.00117	0.00581	0.0151
Ndrg2	N-myc downstream regulated gene 2	0.6	0.00116	0.0058	0.0151
Rpl34	ribosomal protein L34	0.26	0.00116	0.0058	0.0151
Hist1h4i	histone cluster 1, H4i	2.91	0.00115	0.00574	0.0149
Ttc38	tetratricopeptide repeat domain 38	1.97	0.00113	0.00568	0.0147
4930511M06Rik	RIKEN cDNA 4930511M06 gene	2.98	0.00114	0.00568	0.0147
Tbc1d20	TBC1 domain family, member 20	0.65	0.00114	0.00568	0.0147
Gsdma	gasdermin A	2.43	0.00113	0.00566	0.0147
Sox30	SRY (sex determining region Y)-box 30	2.97	0.00112	0.00565	0.0147
Itgav	integrin alpha V	1.99	0.00112	0.00565	0.0147
Elf4	E74-like factor 4 (ets domain transcription factor)	3.43	0.00113	0.00565	0.0147
Tprn	taperin	0.39	0.00112	0.00563	0.0146
Trim30b	tripartite motif-containing 30B	3.18	0.00112	0.00562	0.0146
Draxin	dorsal inhibitory axon guidance protein	0.45	0.00111	0.00561	0.0146
Magel2	melanoma antigen, family L, 2	0.28	0.0011	0.00557	0.0145
B630019K06Rik	novel protein similar to F-box and leucine-rich repeat protein 17 (Fbxl17)	0.47	0.0011	0.00557	0.0145
Stc1	stanniocalcin 1	2.19	0.0011	0.00555	0.0144
Cib2	calcium and integrin binding family member 2	0.24	0.00108	0.00545	0.0142
D5Ertd615e	DNA segment, Chr 5, ERATO Doi 615, expressed	2.56	0.00108	0.00545	0.0142
Nmi	N-myc (and STAT) interactor	1.87	0.00107	0.00541	0.014
C1qtnf4	C1q and tumor necrosis factor related protein 4	0.25	0.00106	0.00539	0.014
Syndig1	synapse differentiation inducing 1	0.39	0.00106	0.00538	0.014
Jup	junction plakoglobin	0.41	0.00105	0.00536	0.0139
Nxph2	neurexophilin 2	0.38	0.00105	0.00536	0.0139
Gltscr2	glioma tumor suppressor candidate region gene 2	0.27	0.00105	0.00536	0.0139
Neurod6	neurogenic differentiation 6	0.35	0.00103	0.00526	0.0137
Rps21	ribosomal protein S21	0.31	0.00103	0.00525	0.0136
Erdr1	erythroid differentiation regulator 1	2.83	0.00102	0.00522	0.0136
Myo10	myosin X	2.49	0.00101	0.00519	0.0135
Ttc25	tetratricopeptide repeat domain 25	1.68	0.00101	0.00516	0.0134
Lypd6b	LY6/PLAUR domain containing 6B	0.3	0.00101	0.00516	0.0134
Igsf1	immunoglobulin superfamily, member 1	0.36	0.00101	0.00516	0.0134
Gm11974	predicted gene 11974	1.69	0.000994	0.0051	0.0132
Tigd5	tigger transposable element derived 5	0.42	0.000993	0.0051	0.0132
Fsd1	fibronectin type 3 and SPRY domain-containing protein	0.43	0.000992	0.0051	0.0132
D430041D05Rik	RIKEN cDNA D430041D05 gene	0.38	0.000987	0.00508	0.0132
Cdc25c	cell division cycle 25C	2.51	0.000984	0.00507	0.0132
Itpkc	inositol 1,4,5-trisphosphate 3-kinase C	0.47	0.000983	0.00507	0.0132
Arl8a	ADP-ribosylation factor-like 8A	0.56	0.000981	0.00506	0.0131
Fam69c	family with sequence similarity 69, member C	0.37	0.000977	0.00506	0.0131
Kif5c	kinesin family member 5C	0.54	0.00098	0.00506	0.0131
Gm38415	-	5.29	0.000978	0.00506	0.0131
Abcb9	ATP-binding cassette, sub-family B (MDR/TAP), member 9	0.4	0.000973	0.00504	0.0131
Cdkn1c	cyclin-dependent kinase inhibitor 1C (P57)	0.28	0.000958	0.00497	0.0129
Mb21d2	Mab-21 domain containing 2	0.61	0.000955	0.00496	0.0129
9130011E15Rik	RIKEN cDNA 9130011E15 gene	0.56	0.000943	0.0049	0.0127
Ndfip1	Nedd4 family interacting protein 1	0.48	0.000931	0.00484	0.0126
Ablim3	actin binding LIM protein family, member 3	0.56	0.000925	0.00482	0.0125
Camk2b	calcium/calmodulin-dependent protein kinase II, beta	0.64	0.000921	0.0048	0.0125
Ush2a	Usher syndrome 2A (autosomal recessive, mild)	1.9	0.000913	0.00478	0.0124
Pou6f2	POU domain, class 6, transcription factor 2	0.51	0.000915	0.00478	0.0124
Acer1	alkaline ceramidase 1	3.83	0.000913	0.00478	0.0124
Nmrk1	nicotinamide riboside kinase 1	2.63	0.000917	0.00478	0.0124
Neurog2	neurogenin 2	0.5	0.000914	0.00478	0.0124
Pcdha11	protocadherin alpha 11	0.4	0.000907	0.00476	0.0124
Eya2	eyes absent 2 homolog (Drosophila)	0.25	0.000905	0.00476	0.0124
Spp1	secreted phosphoprotein 1	2.8	0.000907	0.00476	0.0124
Itgam	integrin alpha M	2.19	0.000908	0.00476	0.0124
Gnao1	guanine nucleotide binding protein, alpha O	0.59	0.000904	0.00476	0.0124
Mapk8ip2	mitogen-activated protein kinase 8 interacting protein 2	0.53	0.000899	0.00473	0.0123
Nptxr	neuronal pentraxin receptor	0.17	0.000893	0.00471	0.0122
Plcb1	phospholipase C, beta 1	0.62	0.000892	0.00471	0.0122
Pcdha1	protocadherin alpha 1	0.24	0.00089	0.0047	0.0122
Ntrk1	neurotrophic tyrosine kinase, receptor, type 1	0.29	0.000886	0.00469	0.0122
AA413626	ribosomal protein L17 pseudogene	3.56	0.000877	0.00465	0.0121
Tigit	T cell immunoreceptor with Ig and ITIM domains	5.1	0.000878	0.00465	0.0121
Ndufa3	NADH dehydrogenase (ubiquinone) 1 alpha subcomplex, 3	0.25	0.000878	0.00465	0.0121
Hsd17b4	hydroxysteroid (17-beta) dehydrogenase 4	0.61	0.000873	0.00464	0.012
Gpi1	glucose phosphate isomerase 1	0.36	0.000871	0.00463	0.012
Ddr1	discoidin domain receptor family, member 1	0.55	0.000867	0.00462	0.012
Opcml	opioid binding protein/cell adhesion molecule-like	0.34	0.00086	0.00458	0.0119
Itm2c	integral membrane protein 2C	0.27	0.000857	0.00457	0.0119
Hunk	hormonally upregulated Neu-associated kinase	0.61	0.000856	0.00457	0.0119
Eef2	eukaryotic translation elongation factor 2	0.28	0.000848	0.00453	0.0118
Snap47	synaptosomal-associated protein, 47	0.47	0.000844	0.00452	0.0117
Map3k7cl	Map3k7 C-terminal like	4.72	0.000844	0.00452	0.0117
Rrbp1	ribosome binding protein 1	1.86	0.000839	0.00449	0.0117
Adcy4	adenylate cyclase 4	4.7	0.000826	0.00443	0.0115
Gm5615	predicted gene 5615	3.87	0.000822	0.00441	0.0115
Ncdn	neurochondrin	0.52	0.000812	0.00436	0.0113
Usp22	ubiquitin specific peptidase 22	0.64	0.000807	0.00434	0.0113
Ndp	Norrie disease (pseudoglioma) (human)	2.16	0.000807	0.00434	0.0113
Cald1	caldesmon 1	1.78	0.000797	0.0043	0.0111
Pla2r1	phospholipase A2 receptor 1	2.13	0.00079	0.00426	0.0111
Slc1a5	solute carrier family 1 (neutral amino acid transporter), member 5	2.03	0.000788	0.00426	0.011
Parp4	poly (ADP-ribose) polymerase family, member 4	2.43	0.000786	0.00425	0.011
Sox4	SRY (sex determining region Y)-box 4	0.56	0.00078	0.00423	0.011
Vsig10l	ZV-set and immunoglobulin domain containing 10 like	1.89	0.000781	0.00423	0.011
Gm20139	predicted gene, 20139	3.19	0.000777	0.00421	0.0109
Ube2e2	ubiquitin-conjugating enzyme E2E 2	0.54	0.000774	0.0042	0.0109
Gm26705	uncharacterized LOC381967	3.83	0.000773	0.0042	0.0109
Doc2a	double C2, alpha	0.41	0.000774	0.0042	0.0109
Kitl	kit ligand	2.19	0.000769	0.00419	0.0109
Jak3	Janus kinase 3	3.06	0.000754	0.00411	0.0107
Eif2ak2	eukaryotic translation initiation factor 2-alpha kinase 2	2.11	0.000749	0.00409	0.0106
Cspg4	chondroitin sulfate proteoglycan 4	3.4	0.000741	0.00405	0.0105
Nt5dc2	5'-nucleotidase domain containing 2	0.37	0.000737	0.00403	0.0105
Swap70	SWA-70 protein	1.73	0.000737	0.00403	0.0105
Slc24a1	solute carrier family 24 (sodium/potassium/calcium exchanger), member 1	1.81	0.000735	0.00403	0.0105
Cd24a	CD24a antigen	0.4	0.000733	0.00402	0.0104
Blcap	bladder cancer associated protein homolog (human)	0.56	0.000732	0.00402	0.0104
Atp9a	ATPase, class II, type 9A	0.44	0.000732	0.00402	0.0104
Acvr2b	activin receptor IIB	1.85	0.000734	0.00402	0.0104
Adcy3	adenylate cyclase 3	0.52	0.000728	0.00401	0.0104
Sh3bp4	SH3-domain binding protein 4	0.44	0.000718	0.00396	0.0103
Ncald	neurocalcin delta	0.54	0.000715	0.00395	0.0102
Fam19a5	family with sequence similarity 19, member A5	0.53	0.000712	0.00393	0.0102
Klhdc8a	kelch domain containing 8A	0.38	0.000708	0.00392	0.0102
Thra	thyroid hormone receptor alpha	0.42	0.000709	0.00392	0.0102
Itga4	integrin alpha 4	4.02	0.000696	0.00386	0.01
Nipal1	NIPA-like domain containing 1	2.48	0.000693	0.00384	0.00997
Scarf1	scavenger receptor class F, member 1	2.31	0.000689	0.00383	0.00994
Diap3	diaphanous homolog 3 (Drosophila)	2.28	0.000686	0.00381	0.0099
Fam131a	family with sequence similarity 131, member A	0.44	0.000685	0.00381	0.0099
Ahnak	AHNAK nucleoprotein (desmoyokin)	2.77	0.000679	0.00378	0.00982
Gm13238	carnitine deficiency-associated gene expressed in ventricle 3 pseudogene	4.31	0.000678	0.00378	0.00982
Kdm2b	lysine (K)-specific demethylase 2B	0.65	0.000678	0.00378	0.00982
Gm10190	predicted gene 10190	2.06	0.000675	0.00377	0.00978
Fscn1	fascin homolog 1, actin bundling protein (Strongylocentrotus purpuratus)	0.53	0.000671	0.00375	0.00975
Il5ra	interleukin 5 receptor, alpha	3.13	0.00067	0.00375	0.00973
Esrra	estrogen related receptor, alpha	0.49	0.000667	0.00374	0.00971
Met	met proto-oncogene	2.35	0.000667	0.00374	0.00971
4921531C22Rik	RIKEN cDNA 4921531C22 gene	1.75	0.000665	0.00374	0.0097
Ranbp3l	RAN binding protein 3-like	3.65	0.000662	0.00373	0.00968
Cfap53	coiled-coil domain containing 11	3.54	0.000662	0.00373	0.00968
Sema6d	sema domain, transmembrane domain (TM), and cytoplasmic domain, (semaphorin) 6D	2.8	0.000657	0.00371	0.00962
Tmem92	transmembrane protein 92	0.38	0.000655	0.0037	0.0096
Rpp25	ribonuclease P/MRP 25 subunit	0.4	0.000653	0.00369	0.00958
Sv2c	synaptic vesicle glycoprotein 2c	0.36	0.000645	0.00365	0.00947
Pcdha6	protocadherin alpha 6	0.34	0.000644	0.00365	0.00947
A2m	alpha-2-macroglobulin	2.5	0.000641	0.00364	0.00944
Tmem255b	transmembrane protein 255B	2.53	0.000641	0.00364	0.00944
9030612E09Rik	RIKEN cDNA 9030612E09 gene	2.1	0.000635	0.00361	0.00936
Wipi1	WD repeat domain, phosphoinositide interacting 1	1.62	0.00063	0.00358	0.0093
Dhcr24	24-dehydrocholesterol reductase	0.41	0.000627	0.00357	0.00927
Trip11	thyroid hormone receptor interactor 11	2.26	0.000626	0.00357	0.00926
Zbtb20	zinc finger and BTB domain containing 20	2.38	0.000622	0.00355	0.00922
Pcdha4	protocadherin alpha 4	0.41	0.000621	0.00355	0.00921
Epha8	Eph receptor A8	0.49	0.000621	0.00355	0.00921
1700001F09Rik	RIKEN cDNA 1700001F09 gene	0.09	0.000619	0.00355	0.0092
Shc2	SHC (Src homology 2 domain containing) transforming protein 2	0.55	0.000618	0.00354	0.00919
Kcnj16	potassium inwardly-rectifying channel, subfamily J, member 16	3.28	0.000611	0.00351	0.0091
Rbms3	RNA binding motif, single stranded interacting protein	0.57	0.000611	0.00351	0.0091
D830005E20Rik	RIKEN cDNA D830005E20 gene	2.95	0.000608	0.0035	0.00908
Gm14204	predicted gene 14204	0.5	0.000608	0.0035	0.00908
Fam69b	family with sequence similarity 69, member B	0.25	0.000606	0.00349	0.00907
Arhgef4	Rho guanine nucleotide exchange factor (GEF) 4	0.52	0.0006	0.00346	0.00898
Ttk	Ttk protein kinase	3.29	0.000599	0.00346	0.00898
9430037G07Rik	RIKEN cDNA 9430037G07 gene	2.95	0.000598	0.00346	0.00897
Tpi1	triosephosphate isomerase 1	0.36	0.000593	0.00343	0.00891
Cyyr1	cysteine and tyrosine-rich protein 1	2.97	0.000588	0.00341	0.00886
Thg1l	tRNA-histidine guanylyltransferase 1-like (S. cerevisiae)	1.61	0.000587	0.00341	0.00885
Lrfn1	leucine rich repeat and fibronectin type III domain containing 1	0.46	0.000587	0.00341	0.00885
Agtpbp1	ATP/GTP binding protein 1	2.63	0.000584	0.00341	0.00884
Grin2b	glutamate receptor, ionotropic, NMDA2B (epsilon 2)	2.38	0.000585	0.00341	0.00884
Car11	carbonic anhydrase 11	0.4	0.000585	0.00341	0.00884
Cdca2	cell division cycle associated 2	2.21	0.000582	0.0034	0.00883
Trpm3	transient receptor potential cation channel, subfamily M, member 3	2.58	0.000583	0.0034	0.00883
Dnah9	dynein, axonemal, heavy chain 9	1.96	0.000577	0.00339	0.00879
Cdo1	cysteine dioxygenase 1, cytosolic	0.56	0.000579	0.00339	0.00879
Grhpr	glyoxylate reductase/hydroxypyruvate reductase	0.24	0.000578	0.00339	0.00879
Itpripl2	inositol 1,4,5-triphosphate receptor interacting protein-like 2	2.37	0.000576	0.00339	0.00879
Acsm2	acyl-CoA synthetase medium-chain family member 2	4.97	0.000577	0.00339	0.00879
Lrrc2	leucine rich repeat containing 2	2.06	0.000578	0.00339	0.00879
Vamp5	vesicle-associated membrane protein 5	2.44	0.000574	0.00338	0.00878
Chrnb1	cholinergic receptor, nicotinic, beta polypeptide 1 (muscle)	2.29	0.000564	0.00333	0.00864
Tpx2	TPX2, microtubule-associated protein homolog (Xenopus laevis)	2.26	0.000565	0.00333	0.00864
Pcdha5	protocadherin alpha 5	0.39	0.000561	0.00331	0.00861
Hpgd	hydroxyprostaglandin dehydrogenase 15 (NAD)	0.41	0.000559	0.00331	0.00858
9930111J21Rik1	RIKEN cDNA 9930111J21 gene 1	6.32	0.000552	0.00327	0.00849
Lgi3	leucine-rich repeat LGI family, member 3	0.32	0.00055	0.00326	0.00847
Cdh5	cadherin 5	3.17	0.000549	0.00326	0.00846
Tagln2	transgelin 2	3.03	0.000545	0.00324	0.00841
Mcidas	multiciliate differentiation and DNA synthesis associated cell cycle protein	4.11	0.000543	0.00323	0.00838
Rab3a	RAB3A, member RAS oncogene family	0.39	0.000525	0.00313	0.00812
Nudt3	nudix (nucleotide diphosphate linked moiety X)-type motif 3	0.44	0.000523	0.00312	0.00809
Slitrk1	SLIT and NTRK-like family, member 1	0.46	0.000517	0.00309	0.00801
Pcx	pyruvate carboxylase	0.36	0.000514	0.00308	0.00799
Esco2	establishment of cohesion 1 homolog 2 (S. cerevisiae)	2.92	0.000507	0.00304	0.00788
Col16a1	collagen, type XVI, alpha 1	3.06	0.000505	0.00302	0.00785
Chst8	carbohydrate (N-acetylgalactosamine 4-0) sulfotransferase 8	0.26	0.000502	0.00301	0.00781
Tsn	translin	0.67	0.000498	0.00299	0.00777
Ccdc68	coiled-coil domain containing 68	3.97	0.000497	0.00299	0.00776
Lypd1	Ly6/Plaur domain containing 1	0.31	0.000494	0.00297	0.00772
Tmem117	transmembrane protein 117	0.36	0.000493	0.00297	0.00771
Egr1	early growth response 1	1.97	0.000485	0.00293	0.00759
Tuba1a	tubulin, alpha 1A	0.26	0.000484	0.00292	0.00759
Mvb12b	multivesicular body subunit 12B	0.59	0.000481	0.00291	0.00756
Slc22a30	solute carrier family 22, member 30	3.93	0.000475	0.00287	0.00746
Ecscr	endothelial cell surface expressed chemotaxis and apoptosis regulator	3.21	0.000471	0.00285	0.00741
Mastl	microtubule associated serine/threonine kinase-like	2.15	0.000469	0.00285	0.00739
Lypd6	LY6/PLAUR domain containing 6	0.57	0.000464	0.00282	0.00732
Sertad4	SERTA domain containing 4	0.5	0.00046	0.0028	0.00727
Dnm3os	dynamin 3, opposite strand	3.05	0.000459	0.0028	0.00726
Mmp9	matrix metallopeptidase 9	0.37	0.000459	0.0028	0.00726
Cabp1	calcium binding protein 1	0.54	0.000456	0.00278	0.00722
Cp	ceruloplasmin	2.66	0.000447	0.00273	0.0071
Pfn2	profilin 2	0.6	0.000448	0.00273	0.0071
Vstm2a	V-set and transmembrane domain containing 2A	0.52	0.000441	0.0027	0.00702
Grk4	G protein-coupled receptor kinase 4	2.94	0.000441	0.0027	0.00702
Kif1bp	RIKEN cDNA 2510003E04 gene	0.64	0.00044	0.0027	0.00701
Ptgs2	prostaglandin-endoperoxide synthase 2	3.91	0.000434	0.00267	0.00693
Scube1	signal peptide, CUB domain, EGF-like 1	2.64	0.000433	0.00267	0.00693
Atp6v0c	ATPase, H+ transporting, lysosomal V0 subunit C	0.38	0.000434	0.00267	0.00693
Shcbp1	Shc SH2-domain binding protein 1	2.77	0.000426	0.00263	0.00683
Rasl10b	RAS-like, family 10, member B	0.34	0.000425	0.00262	0.00681
Plcz1	phospholipase C, zeta 1	4.57	0.000422	0.00261	0.00678
Atxn10	ataxin 10	0.43	0.000422	0.00261	0.00677
Sertm1	serine rich and transmembrane domain containing 1	0.25	0.000422	0.00261	0.00677
Gm16532	predicted gene, 16532	0.36	0.000421	0.00261	0.00677
Bub1b	budding uninhibited by benzimidazoles 1 homolog, beta (S. cerevisiae)	2.31	0.000419	0.0026	0.00675
Cd52	CD52 antigen	3.18	0.000412	0.00256	0.00665
Lppr1	RIKEN cDNA E130309F12 gene	0.56	0.000408	0.00254	0.0066
4921529L05Rik	RIKEN cDNA 4921529L05 gene	4.86	0.000409	0.00254	0.0066
Mcm10	minichromosome maintenance deficient 10 (S. cerevisiae)	2.8	0.000404	0.00252	0.00655
Ckap2l	cytoskeleton associated protein 2-like	2.65	0.000404	0.00252	0.00655
Rasd2	RASD family, member 2	0.35	0.000395	0.00247	0.00641
Galnt14	UDP-N-acetyl-alpha-D-galactosamine:polypeptide N-acetylgalactosaminyltransferase 14	0.42	0.00039	0.00244	0.00634
Itgb1	integrin beta 1 (fibronectin receptor beta)	2.09	0.00039	0.00244	0.00634
Gnas	GNAS (guanine nucleotide binding protein, alpha stimulating) complex locus	0.55	0.000388	0.00244	0.00633
Lcp1	lymphocyte cytosolic protein 1	2.32	0.000381	0.0024	0.00622
Ppme1	protein phosphatase methylesterase 1	0.43	0.00038	0.00239	0.00621
Kremen2	kringle containing transmembrane protein 2	3.2	0.000378	0.00238	0.00617
Dmtn	dematin actin binding protein	0.56	0.000375	0.00237	0.00615
Scg3	secretogranin III	0.62	0.000376	0.00237	0.00615
Brinp3	bone morphogenetic protein/retinoic acid inducible neural specific 3	0.35	0.000374	0.00237	0.00614
Eif3f	eukaryotic translation initiation factor 3, subunit F	0.25	0.000371	0.00235	0.00609
A930007I19Rik	RIKEN cDNA A930007I19 gene	4.88	0.000368	0.00233	0.00605
Hid1	HID1 domain containing	0.54	0.000365	0.00232	0.00601
Sfxn1	sideroflexin 1	0.62	0.000356	0.00226	0.00587
Alox12b	arachidonate 12-lipoxygenase, 12R type	0.2	0.000354	0.00225	0.00585
Lox	lysyl oxidase	0.39	0.000349	0.00222	0.00576
Postn	periostin, osteoblast specific factor	2.19	0.000348	0.00222	0.00576
Serpine3	serpin peptidase inhibitor, clade E (nexin, plasminogen activator inhibitor type 1), member 3	0.2	0.000347	0.00221	0.00574
Sgsm1	small G protein signaling modulator 1	0.59	0.000343	0.00219	0.00569
Tox3	TOX high mobility group box family member 3	0.51	0.000342	0.00219	0.00568
4933429O19Rik	RIKEN cDNA 4933429O19 gene	2.57	0.000341	0.00219	0.00567
AI197445	expressed sequence AI197445	2.16	0.000335	0.00214	0.00557
Ldhb	lactate dehydrogenase B	0.35	0.00033	0.00212	0.0055
Gm10845	predicted gene 10845	2.17	0.000329	0.00212	0.00549
Lama5	laminin, alpha 5	2.67	0.000328	0.00211	0.00548
Pak6	p21 protein (Cdc42/Rac)-activated kinase 6	0.42	0.000327	0.0021	0.00546
Msl3l2	male-specific lethal 3-like 2 (Drosophila)	0.51	0.000326	0.0021	0.00545
Gck	glucokinase	0.33	0.000324	0.00209	0.00544
Spdl1	spindle apparatus coiled-coil protein 1	2.32	0.000324	0.00209	0.00543
Kcnq3	potassium voltage-gated channel, subfamily Q, member 3	0.21	0.000323	0.00209	0.00543
Ppic	peptidylprolyl isomerase C	2.01	0.000321	0.00208	0.0054
Gm17821	DDB1 and CUL4 associated factor 5 pseudogene	2.76	0.000313	0.00203	0.00527
Adgra1	G protein-coupled receptor 123	0.51	0.000311	0.00202	0.00524
Fzd4	frizzled homolog 4 (Drosophila)	2.09	0.000309	0.00201	0.00522
Ctnnbip1	catenin beta interacting protein 1	0.46	0.000308	0.00201	0.00521
Rasef	RAS and EF hand domain containing	2.38	0.000306	0.002	0.00518
Cyp26a1	cytochrome P450, family 26, subfamily a, polypeptide 1	2.63	0.000304	0.00199	0.00515
Ghsr	growth hormone secretagogue receptor	0.2	0.000301	0.00197	0.0051
Slc35f4	solute carrier family 35, member F4	0.25	0.000293	0.00192	0.00498
Olfm3	olfactomedin 3	0.38	0.000293	0.00192	0.00498
Shf	Src homology 2 domain containing F	0.33	0.000292	0.00192	0.00497
March4	membrane-associated ring finger (C3HC4) 4	0.51	0.000291	0.00191	0.00497
Icam5	intercellular adhesion molecule 5, telencephalin	0.21	0.000288	0.00189	0.00492
Heg1	HEG homolog 1 (zebrafish)	2.12	0.000287	0.00189	0.00491
Cntnap3	contactin associated protein-like 3	0.23	0.000286	0.00189	0.0049
Pappa2	pappalysin 2	0.37	0.000278	0.00184	0.00477
Elmod1	ELMO/CED-12 domain containing 1	0.51	0.000278	0.00184	0.00477
Adgrg6	G protein-coupled receptor 126	3.09	0.000277	0.00184	0.00476
Bnip3	BCL2/adenovirus E1B interacting protein 3	0.49	0.000277	0.00183	0.00476
Magt1	magnesium transporter 1	1.88	0.000269	0.00179	0.00464
Hcn2	hyperpolarization-activated, cyclic nucleotide-gated K+ 2	0.3	0.000268	0.00178	0.00463
S1pr1	sphingosine-1-phosphate receptor 1	2.22	0.000268	0.00178	0.00462
Zwint	ZW10 interactor	0.54	0.000266	0.00177	0.00459
Map1lc3a	microtubule-associated protein 1 light chain 3 alpha	0.29	0.000264	0.00176	0.00456
Zwilch	zwilch kinetochore protein	2.71	0.000263	0.00175	0.00456
Aspm	asp (abnormal spindle)-like, microcephaly associated (Drosophila)	3.01	0.000262	0.00175	0.00454
Ms4a6c	membrane-spanning 4-domains, subfamily A, member 6C	2.79	0.00026	0.00174	0.00452
Gm4841	predicted gene 4841	3.65	0.000254	0.0017	0.00442
Cav2	caveolin 2	2.3	0.000254	0.0017	0.00442
Scrn1	secernin 1	0.38	0.000252	0.00169	0.0044
Rac1	RAS-related C3 botulinum substrate 1	0.61	0.00025	0.00168	0.00437
Enho	energy homeostasis associated	0.3	0.000249	0.00168	0.00436
Gbp6	guanylate binding protein 6	2.32	0.000248	0.00167	0.00433
Ddx25	DEAD (Asp-Glu-Ala-Asp) box polypeptide 25	0.59	0.000244	0.00165	0.00428
Lhx9	LIM homeobox protein 9	0.48	0.000243	0.00164	0.00426
Btc	betacellulin, epidermal growth factor family member	2.45	0.000238	0.00161	0.00418
Fn1	fibronectin 1	2.97	0.000236	0.00161	0.00417
Tubb2b	tubulin, beta 2B class IIB	0.38	0.000236	0.00161	0.00417
Lrrk2	leucine-rich repeat kinase 2	2.54	0.000236	0.00161	0.00417
Map1a	microtubule-associated protein 1 A	0.41	0.000235	0.00161	0.00417
Pnrc1	proline-rich nuclear receptor coactivator 1	0.59	0.000237	0.00161	0.00417
Tyms	thymidylate synthase	1.9	0.000237	0.00161	0.00417
Ptpro	protein tyrosine phosphatase, receptor type, O	0.5	0.000237	0.00161	0.00417
Kif3c	kinesin family member 3C	0.63	0.000234	0.0016	0.00416
Adamts2	a disintegrin-like and metallopeptidase (reprolysin type) with thrombospondin type 1 motif, 2	2.57	0.000234	0.0016	0.00415
Tmeff1	transmembrane protein with EGF-like and two follistatin-like domains 1	0.45	0.000232	0.00159	0.00414
Ppp1r9b	protein phosphatase 1, regulatory subunit 9B	0.59	0.00023	0.00158	0.00411
Rell2	RELT-like 2	0.34	0.00023	0.00158	0.00411
Ubash3b	ubiquitin associated and SH3 domain containing, B	0.52	0.000231	0.00158	0.00411
Lpp	LIM domain containing preferred translocation partner in lipoma	2.93	0.000228	0.00157	0.00408
Ppp2r1a	protein phosphatase 2, regulatory subunit A, alpha	0.41	0.000227	0.00157	0.00406
Kcnj15	potassium inwardly-rectifying channel, subfamily J, member 15	3.88	0.000225	0.00156	0.00404
Bdh1	3-hydroxybutyrate dehydrogenase, type 1	0.47	0.000224	0.00155	0.00403
Nrip2	nuclear receptor interacting protein 2	0.27	0.000224	0.00155	0.00402
Amer2	APC membrane recruitment 2	1.68	0.000222	0.00154	0.00401
Rn4.5s	4.5S RNA	1.86	0.000223	0.00154	0.00401
Foxo6	forkhead box O6	0.36	0.000221	0.00154	0.00399
Tfpi	tissue factor pathway inhibitor	2.46	0.000219	0.00153	0.00396
Gpr4	G protein-coupled receptor 4	3.64	0.000217	0.00152	0.00394
Pvrl3	poliovirus receptor-related 3	1.97	0.000214	0.0015	0.00388
Syngr3	synaptogyrin 3	0.31	0.000214	0.00149	0.00388
Veph1	ventricular zone expressed PH domain-containing 1	2.32	0.000212	0.00149	0.00386
Wwtr1	WW domain containing transcription regulator 1	1.94	0.000211	0.00148	0.00383
Gm16702	predicted gene, 16702	2.83	0.000207	0.00145	0.00376
Spry1	sprouty homolog 1 (Drosophila)	2.1	0.000202	0.00142	0.00369
Ppargc1b	peroxisome proliferative activated receptor, gamma, coactivator 1 beta	1.81	0.0002	0.00141	0.00366
Cdkl1	cyclin-dependent kinase-like 1 (CDC2-related kinase)	0.25	0.000196	0.00138	0.00358
Etv4	ets variant gene 4 (E1A enhancer binding protein, E1AF)	2.87	0.000195	0.00137	0.00357
Duxbl2	doubl homeobox B-like 2	2.77	0.000192	0.00136	0.00353
Duxbl3	double homeobox B-like 3	2.77	0.000192	0.00136	0.00353
Tnfrsf10b	tumor necrosis factor receptor superfamily, member 10b	2.56	0.000193	0.00136	0.00353
Hmx1	H6 homeobox 1	0.34	0.000193	0.00136	0.00353
Cmas	cytidine monophospho-N-acetylneuraminic acid synthetase	0.56	0.000192	0.00136	0.00353
Gm2381	zinc finger protein 936 pseudogene	6.58	0.000188	0.00134	0.00348
Gbp7	guanylate binding protein 7	2.29	0.000188	0.00134	0.00347
1600014C10Rik	RIKEN cDNA 1600014C10 gene	0.57	0.000188	0.00134	0.00347
Cd200	CD200 antigen	0.56	0.000187	0.00133	0.00347
Apod	apolipoprotein D	0.27	0.000186	0.00133	0.00345
Dhh	desert hedgehog	2.07	0.000185	0.00133	0.00344
Samd5	sterile alpha motif domain containing 5	2.58	0.000182	0.0013	0.00338
Slc5a7	solute carrier family 5 (choline transporter), member 7	0.37	0.000182	0.0013	0.00338
Gm20337	predicted gene, 20337	2.46	0.000178	0.00128	0.00332
A230070E04Rik	RIKEN cDNA A230070E04 gene	0.32	0.000178	0.00128	0.00332
Grm3	glutamate receptor, metabotropic 3	0.33	0.000177	0.00128	0.00332
Rassf5	Ras association (RalGDS/AF-6) domain family member 5	0.37	0.000174	0.00126	0.00327
Lsamp	limbic system-associated membrane protein	0.45	0.000175	0.00126	0.00327
Slc2a6	solute carrier family 2 (facilitated glucose transporter), member 6	0.31	0.000173	0.00125	0.00326
Eef1a2	eukaryotic translation elongation factor 1 alpha 2	0.31	0.000173	0.00125	0.00326
Rhov	ras homolog gene family, member V	0.14	0.00017	0.00123	0.0032
Lrrc32	leucine rich repeat containing 32	3.04	0.00017	0.00123	0.0032
Kctd13	potassium channel tetramerisation domain containing 13	0.48	0.000169	0.00123	0.00318
Galnt15	UDP-N-acetyl-alpha-D-galactosamine:polypeptide N-acetylgalactosaminyltransferase 15	0.28	0.000167	0.00122	0.00316
Apcdd1	adenomatosis polyposis coli down-regulated 1	0.47	0.000167	0.00122	0.00316
Txnrd3	thioredoxin reductase 3	0.46	0.000166	0.00121	0.00315
Egln3	EGL nine homolog 3 (C. elegans)	0.33	0.000165	0.00121	0.00313
Arhgdig	Rho GDP dissociation inhibitor (GDI) gamma	0.2	0.000165	0.00121	0.00313
Cybb	cytochrome b-245, beta polypeptide	4.44	0.000164	0.00121	0.00313
Cxx1b	CAAX box 1B	0.44	0.000164	0.0012	0.00313
Opn4	opsin 4 (melanopsin)	0.25	0.000162	0.00119	0.00309
Apoc1	apolipoprotein C-I	0.28	0.000159	0.00117	0.00305
Tmem59l	transmembrane protein 59-like	0.34	0.000159	0.00117	0.00305
Ephx4	epoxide hydrolase 4	0.35	0.000157	0.00116	0.00301
Fam217b	family with sequence similarity 217, member B	0.35	0.000156	0.00116	0.003
Pnmal1	PNMA-like 1	0.46	0.000156	0.00116	0.003
Gbp3	guanylate binding protein 3	2.94	0.000155	0.00115	0.00299
6330415B21Rik	RIKEN cDNA 6330415B21 gene	3.35	0.000154	0.00114	0.00297
Tram1l1	translocation associated membrane protein 1-like 1	0.6	0.000153	0.00113	0.00294
Plxnd1	plexin D1	3.08	0.000149	0.00111	0.00288
Clrn1	clarin 1	2.37	0.000145	0.00108	0.00282
Slc6a1	solute carrier family 6 (neurotransmitter transporter, GABA), member 1	0.43	0.000145	0.00108	0.00281
Gabrd	gamma-aminobutyric acid (GABA) A receptor, subunit delta	0.18	0.000144	0.00108	0.0028
Runx1	runt related transcription factor 1	2.93	0.000143	0.00107	0.00279
Neat1	nuclear paraspeckle assembly transcript 1 (non-protein coding)	4.18	0.000143	0.00107	0.00279
Cnr1	cannabinoid receptor 1 (brain)	0.42	0.000143	0.00107	0.00279
Shb	src homology 2 domain-containing transforming protein B	0.27	0.000143	0.00107	0.00279
Prkaca	protein kinase, cAMP dependent, catalytic, alpha	0.57	0.000143	0.00107	0.00279
Asphd2	aspartate beta-hydroxylase domain containing 2	0.27	0.000141	0.00107	0.00277
Dll3	delta-like 3 (Drosophila)	0.3	0.00014	0.00106	0.00275
Ddit4	DNA-damage-inducible transcript 4	0.6	0.000139	0.00105	0.00273
Arap3	ArfGAP with RhoGAP domain, ankyrin repeat and PH domain 3	2.72	0.000139	0.00105	0.00273
Amer3	APC membrane recruitment 3	0.34	0.000135	0.00103	0.00266
Sh3gl2	SH3-domain GRB2-like 2	1.9	0.000134	0.00102	0.00265
Clec2l	C-type lectin domain family 2, member L	0.31	0.000134	0.00102	0.00265
E2f6	E2F transcription factor 6	1.97	0.000133	0.00101	0.00263
Stx1a	syntaxin 1A (brain)	0.39	0.000133	0.00101	0.00263
Rcan2	regulator of calcineurin 2	0.49	0.00013	0.000995	0.00258
Elavl2	ELAV (embryonic lethal, abnormal vision, Drosophila)-like 2 (Hu antigen B)	0.33	0.00013	0.000991	0.00257
Kirrel3	kin of IRRE like 3 (Drosophila)	0.48	0.000129	0.000987	0.00256
Pdzd4	PDZ domain containing 4	0.44	0.000127	0.000974	0.00253
Rxfp3	relaxin family peptide receptor 3	0.22	0.000126	0.000968	0.00251
Pdyn	prodynorphin	0.36	0.000126	0.000968	0.00251
Syt3	synaptotagmin III	0.33	0.000125	0.00096	0.00249
Greb1	gene regulated by estrogen in breast cancer protein	3.88	0.000123	0.000946	0.00245
Cmip	c-Maf inducing protein	0.58	0.000118	0.000912	0.00237
Mgat3	mannoside acetylglucosaminyltransferase 3	0.46	0.000116	0.000898	0.00233
Airn	antisense Igf2r RNA	3.63	0.000116	0.000898	0.00233
Mstn	myostatin	0.22	0.000115	0.000894	0.00232
Cpne6	copine VI	0.45	0.000115	0.000894	0.00232
Dysf	dysferlin	3.89	0.000115	0.000894	0.00232
Ankrd55	ankyrin repeat domain 55	0.41	0.000113	0.000881	0.00229
Rusc1	RUN and SH3 domain containing 1	0.48	0.000113	0.000881	0.00229
Stbd1	starch binding domain 1	0.42	0.000112	0.000876	0.00227
Acer3	alkaline ceramidase 3	1.75	0.000112	0.000873	0.00227
Depdc1a	DEP domain containing 1a	4.67	0.000111	0.000869	0.00226
Arhgap25	Rho GTPase activating protein 25	2.88	0.000111	0.000869	0.00226
Ypel1	yippee-like 1 (Drosophila)	0.57	0.00011	0.000863	0.00224
Cenpe	centromere protein E	3.66	0.000108	0.000854	0.00222
Rcn2	reticulocalbin 2	0.59	0.000107	0.000848	0.0022
Bcl2	B cell leukemia/lymphoma 2	2.27	0.000104	0.000826	0.00214
6720468P15Rik	RIKEN cDNA 6720468P15 gene	0.19	0.000102	0.00081	0.0021
Zak	sterile alpha motif and leucine zipper containing kinase AZK	2.53	0.000101	0.000805	0.00209
Trim62	tripartite motif-containing 62	0.47	0.000101	0.000805	0.00209
Ankrd46	ankyrin repeat domain 46	0.46	0.000101	0.000802	0.00208
Alg2	asparagine-linked glycosylation 2 (alpha-1,3-mannosyltransferase)	0.62	0.000101	0.000802	0.00208
Rad51c	RAD51 homolog C	1.63	9.76e-05	0.000779	0.00202
Tmem50b	transmembrane protein 50B	0.61	9.76e-05	0.000779	0.00202
Tnip2	TNFAIP3 interacting protein 2	2.42	9.63e-05	0.000771	0.002
Jph4	junctophilin 4	0.51	9.55e-05	0.000766	0.00199
St6gal1	beta galactoside alpha 2,6 sialyltransferase 1	0.47	9.48e-05	0.000761	0.00198
Sv2a	synaptic vesicle glycoprotein 2 a	0.53	9.43e-05	0.000758	0.00197
Rab7b	RIKEN cDNA 5430435G22 gene	2.39	9.28e-05	0.000747	0.00194
Fosl2	fos-like antigen 2	2.74	9.27e-05	0.000747	0.00194
Caln1	calneuron 1	0.41	9.21e-05	0.000744	0.00193
Wnt2b	wingless related MMTV integration site 2b	0.36	9.12e-05	0.000738	0.00192
Nmnat2	nicotinamide nucleotide adenylyltransferase 2	0.52	9.09e-05	0.000736	0.00191
Xpo4	exportin 4	2.49	9.06e-05	0.000736	0.00191
Snhg9	small nucleolar RNA host gene 9	3.44	9.07e-05	0.000736	0.00191
Mapre2	microtubule-associated protein, RP/EB family, member 2	0.64	8.95e-05	0.000728	0.00189
Cdh7	cadherin 7, type 2	0.38	8.82e-05	0.000719	0.00187
Hells	helicase, lymphoid specific	1.96	8.79e-05	0.000718	0.00186
Ak1	adenylate kinase 1	0.26	8.74e-05	0.000716	0.00186
Adcyap1r1	adenylate cyclase activating polypeptide 1 receptor 1	0.34	8.76e-05	0.000716	0.00186
Ephb1	Eph receptor B1	0.49	8.73e-05	0.000716	0.00186
Mif	macrophage migration inhibitory factor	0.29	8.69e-05	0.000715	0.00186
Grb2	growth factor receptor bound protein 2	0.55	8.71e-05	0.000715	0.00186
Pcsk1	proprotein convertase subtilisin/kexin type 1	0.22	8.7e-05	0.000715	0.00186
Gjd2	gap junction protein, delta 2	0.65	8.65e-05	0.000715	0.00186
Lyn	Yamaguchi sarcoma viral (v-yes-1) oncogene homolog	2.49	8.69e-05	0.000715	0.00186
Rnf19b	ring finger protein 19B	0.41	8.68e-05	0.000715	0.00186
Fam212b	family with sequence similarity 212, member B	1.51	8.53e-05	0.000707	0.00184
Gm11127	predicted gene 11127	3.1	8.49e-05	0.000705	0.00183
Crhr1	corticotropin releasing hormone receptor 1	0.31	8.45e-05	0.000703	0.00182
Adgrl4	EGF, latrophilin seven transmembrane domain containing 1	3.6	8.36e-05	0.000696	0.00181
Ak4	adenylate kinase 4	0.5	8.32e-05	0.000694	0.0018
Lrrn3	leucine rich repeat protein 3, neuronal	0.39	8.28e-05	0.000693	0.0018
Cyp2s1	cytochrome P450, family 2, subfamily s, polypeptide 1	0.23	8.29e-05	0.000693	0.0018
Lcn2	lipocalin 2	10.29	8.25e-05	0.000692	0.0018
Rhobtb2	Rho-related BTB domain containing 2	0.52	8.2e-05	0.000689	0.00179
Amigo1	adhesion molecule with Ig like domain 1	0.59	8.04e-05	0.000676	0.00175
Tnnt2	troponin T2, cardiac	5.81	7.87e-05	0.000663	0.00172
Zfp580	zinc finger protein 580	0.38	7.86e-05	0.000663	0.00172
Zfp369	zinc finger protein 369	2.8	7.65e-05	0.000646	0.00168
Grm4	glutamate receptor, metabotropic 4	0.35	7.62e-05	0.000645	0.00167
Ascl1	achaete-scute complex homolog 1 (Drosophila)	0.32	7.53e-05	0.000638	0.00166
Itga5	integrin alpha 5 (fibronectin receptor alpha)	4.06	7.49e-05	0.000636	0.00165
8430419L09Rik	RIKEN cDNA 8430419L09 gene	0.49	7.49e-05	0.000636	0.00165
Rasgrp3	RAS, guanyl releasing protein 3	3.11	7.42e-05	0.000632	0.00164
Entpd3	ectonucleoside triphosphate diphosphohydrolase 3	0.15	7.41e-05	0.000632	0.00164
Abat	4-aminobutyrate aminotransferase	0.52	7.35e-05	0.000629	0.00163
Tekt5	tektin 5	0.11	7.37e-05	0.000629	0.00163
AU021092	expressed sequence AU021092	0.17	7.28e-05	0.000624	0.00162
Aff3	AF4/FMR2 family, member 3	0.5	6.99e-05	0.000601	0.00156
Gdf10	growth differentiation factor 10	0.27	7e-05	0.000601	0.00156
Clip3	CAP-GLY domain containing linker protein 3	0.48	7.01e-05	0.000601	0.00156
Sst	somatostatin	0.18	6.87e-05	0.000593	0.00154
Adam12	a disintegrin and metallopeptidase domain 12 (meltrin alpha)	3.38	6.88e-05	0.000593	0.00154
Phldb2	pleckstrin homology-like domain, family B, member 2	2.47	6.84e-05	0.000592	0.00154
Stmn3	stathmin-like 3	0.19	6.6e-05	0.000572	0.00148
Rapgef3	Rap guanine nucleotide exchange factor (GEF) 3	2.69	6.56e-05	0.000569	0.00148
Tmem69	transmembrane protein 69	1.93	6.41e-05	0.000557	0.00145
Gm5460	predicted gene 5460	3.59	6.28e-05	0.000548	0.00142
Gnai1	guanine nucleotide binding protein (G protein), alpha inhibiting 1	0.51	6.29e-05	0.000548	0.00142
Tsnax	translin-associated factor X	0.6	6.3e-05	0.000548	0.00142
Hdac11	histone deacetylase 11	0.31	6.17e-05	0.00054	0.0014
Sgol2a	shugoshin-like 2 (S. pombe)	2.66	6.15e-05	0.000539	0.0014
Prex2	phosphatidylinositol-3,4,5-trisphosphate-dependent Rac exchange factor 2	3.28	6.05e-05	0.000532	0.00138
Gm20172	predicted gene, 20172	4.5	6.06e-05	0.000532	0.00138
Pax6	paired box 6	0.58	5.92e-05	0.000522	0.00135
6030443J06Rik	RIKEN cDNA 6030443J06 gene	4.03	5.85e-05	0.000517	0.00134
Stat3	signal transducer and activator of transcription 3	2.22	5.72e-05	0.000508	0.00132
Myt1l	myelin transcription factor 1-like	0.54	5.71e-05	0.000508	0.00132
Fgf10	fibroblast growth factor 10	0.35	5.72e-05	0.000508	0.00132
Pard6g	par-6 family cell polarity regulator gamma	0.46	5.73e-05	0.000508	0.00132
Tmem246	transmembrane protein 246	0.38	5.73e-05	0.000508	0.00132
Tspan3	tetraspanin 3	0.52	5.75e-05	0.000508	0.00132
Gm14431	predicted gene 14431	3.15	5.64e-05	0.000503	0.00131
Gm8898	predicted gene 8898	3.15	5.64e-05	0.000503	0.00131
Syt10	synaptotagmin X	0.25	5.61e-05	0.000502	0.0013
Pura	purine rich element binding protein A	2.02	5.59e-05	0.000501	0.0013
Cecr6	cat eye syndrome chromosome region, candidate 6	0.43	5.43e-05	0.000488	0.00127
Ly6h	lymphocyte antigen 6 complex, locus H	0.2	5.4e-05	0.000486	0.00126
Ptprc	protein tyrosine phosphatase, receptor type, C	3.13	5.38e-05	0.000485	0.00126
Id2	inhibitor of DNA binding 2	0.55	5.35e-05	0.000483	0.00125
1500009C09Rik	RIKEN cDNA 1500009C09 gene	0.39	5.33e-05	0.000482	0.00125
Rem2	rad and gem related GTP binding protein 2	0.44	5.11e-05	0.000464	0.0012
Vps37d	vacuolar protein sorting 37D (yeast)	0.42	5.12e-05	0.000464	0.0012
Dusp6	dual specificity phosphatase 6	2.03	5.04e-05	0.000458	0.00119
BC002163	NADH dehydrogenase Fe-S protein 5 pseudogene	8.1	4.96e-05	0.000452	0.00117
E2f8	E2F transcription factor 8	3.72	4.82e-05	0.00044	0.00114
Fndc5	fibronectin type III domain containing 5	0.37	4.78e-05	0.000437	0.00114
Tmbim7	transmembrane BAX inhibitor motif containing 7	3.95	4.64e-05	0.000425	0.0011
Vdac1	voltage-dependent anion channel 1	0.47	4.63e-05	0.000424	0.0011
Evi2b	ecotropic viral integration site 2b	4.78	4.47e-05	0.000411	0.00107
Vcl	vinculin	2.82	4.38e-05	0.000403	0.00105
Uchl1	ubiquitin carboxy-terminal hydrolase L1	0.29	4.38e-05	0.000403	0.00105
5031426D15Rik	RIKEN cDNA 5031426D15 gene	2.87	4.28e-05	0.000395	0.00103
Prss23	protease, serine 23	2.08	4.23e-05	0.000391	0.00102
Procr	protein C receptor, endothelial	6.37	4.2e-05	0.000389	0.00101
Emb	embigin	0.59	4.15e-05	0.000385	0.000999
Fbxo2	F-box protein 2	0.25	4.14e-05	0.000385	0.000999
Fgf13	fibroblast growth factor 13	0.47	4.11e-05	0.000383	0.000993
Tlr4	toll-like receptor 4	3.6	4.01e-05	0.000374	0.000972
Mmp17	matrix metallopeptidase 17	0.32	4.01e-05	0.000374	0.000972
Kcnq1ot1	KCNQ1 overlapping transcript 1	4.65	3.96e-05	0.000371	0.000962
Itga6	integrin alpha 6	2.52	3.88e-05	0.000364	0.000944
Dgcr2	DiGeorge syndrome critical region gene 2	0.6	3.83e-05	0.00036	0.000933
Casp8	caspase 8	2.81	3.81e-05	0.000358	0.00093
Tusc5	tumor suppressor candidate 5	0.16	3.79e-05	0.000358	0.00093
Map2k1	mitogen-activated protein kinase kinase 1	0.57	3.8e-05	0.000358	0.00093
Pgam1	phosphoglycerate mutase 1	0.41	3.77e-05	0.000356	0.000925
Armcx2	armadillo repeat containing, X-linked 2	0.6	3.74e-05	0.000354	0.00092
Ccni	cyclin I	0.43	3.71e-05	0.000353	0.000915
Lgi1	leucine-rich repeat LGI family, member 1	0.4	3.65e-05	0.000347	0.000901
Ulbp1	UL16 binding protein 1	9.91	3.56e-05	0.00034	0.000882
AW046200	expressed sequence AW046200	3.91	3.56e-05	0.00034	0.000882
Slc6a7	solute carrier family 6 (neurotransmitter transporter, L-proline), member 7	0.3	3.55e-05	0.000339	0.000881
Trim16	tripartite motif-containing 16	2.96	3.53e-05	0.000338	0.000877
Lrrc4	leucine rich repeat containing 4	0.53	3.51e-05	0.000337	0.000876
Slco2a1	solute carrier organic anion transporter family, member 2a1	3.71	3.47e-05	0.000334	0.000867
1810009A15Rik	RIKEN cDNA 1810009A15 gene	0.17	3.46e-05	0.000333	0.000864
Gpr65	G-protein coupled receptor 65	4	3.44e-05	0.000332	0.000861
Gm5424	argininosuccinate synthase pseudogene	0.15	3.42e-05	0.00033	0.000858
Ctnna2	catenin (cadherin associated protein), alpha 2	0.49	3.41e-05	0.00033	0.000858
Ccnb1	cyclin B1	2.54	3.39e-05	0.000329	0.000854
Milr1	mast cell immunoglobulin like receptor 1	3.35	3.35e-05	0.000325	0.000844
Pros1	protein S (alpha)	2.31	3.34e-05	0.000325	0.000844
Igsf6	immunoglobulin superfamily, member 6	4.01	3.32e-05	0.000324	0.000842
Golga7b	golgi autoantigen, golgin subfamily a, 7B	0.32	3.21e-05	0.000314	0.000816
Gm1821	ubiquitin pseudogene	0.36	3.18e-05	0.000312	0.00081
Tspan9	tetraspanin 9	0.54	3.15e-05	0.000309	0.000801
Ccdc85a	coiled-coil domain containing 85A	0.39	3.13e-05	0.000308	0.000799
Dirc2	disrupted in renal carcinoma 2 (human)	0.42	3.12e-05	0.000307	0.000797
Fbn2	fibrillin 2	2.87	3.11e-05	0.000307	0.000797
Lrfn5	leucine rich repeat and fibronectin type III domain containing 5	0.26	3.08e-05	0.000304	0.000789
Tmem132a	transmembrane protein 132A	0.54	3.08e-05	0.000304	0.000789
Nusap1	nucleolar and spindle associated protein 1	3.36	2.97e-05	0.000295	0.000765
Lhfp	lipoma HMGIC fusion partner	0.48	2.97e-05	0.000295	0.000765
Lilrb4a	leukocyte immunoglobulin-like receptor, subfamily B, member 4	6.15	2.94e-05	0.000292	0.000759
Kif5a	kinesin family member 5A	0.55	2.91e-05	0.00029	0.000754
Fgf12	fibroblast growth factor 12	0.41	2.87e-05	0.000287	0.000745
Gimap1	GTPase, IMAP family member 1	2.08	2.85e-05	0.000286	0.000742
Hsd17b12	hydroxysteroid (17-beta) dehydrogenase 12	0.61	2.79e-05	0.00028	0.000727
Hmga2	high mobility group AT-hook 2	2.35	2.75e-05	0.000276	0.000717
Tubg2	tubulin, gamma 2	0.36	2.7e-05	0.000272	0.000706
Grin3a	glutamate receptor ionotropic, NMDA3A	0.45	2.64e-05	0.000266	0.000691
Iglon5	IgLON family member 5	0.5	2.64e-05	0.000266	0.000691
Cox4i2	cytochrome c oxidase subunit IV isoform 2	0.15	2.61e-05	0.000265	0.000687
Camk2n2	calcium/calmodulin-dependent protein kinase II inhibitor 2	0.37	2.59e-05	0.000263	0.000682
Gadd45g	growth arrest and DNA-damage-inducible 45 gamma	0.46	2.57e-05	0.000261	0.000679
Dlgap1	discs, large (Drosophila) homolog-associated protein 1	0.52	2.55e-05	0.000259	0.000673
Lamc1	laminin, gamma 1	2.88	2.53e-05	0.000258	0.000669
Tefm	transcription elongation factor, mitochondrial	2.25	2.5e-05	0.000256	0.000664
Tfap2a	transcription factor AP-2, alpha	0.36	2.47e-05	0.000253	0.000657
Dll4	delta-like 4 (Drosophila)	3.63	2.47e-05	0.000253	0.000657
AI593442	expressed sequence AI593442	0.38	2.42e-05	0.000249	0.000645
Ccdc88b	coiled-coil domain containing 88B	0.29	2.36e-05	0.000243	0.00063
Shd	src homology 2 domain-containing transforming protein D	0.49	2.35e-05	0.000242	0.000629
Erap1	endoplasmic reticulum aminopeptidase 1	2.12	2.34e-05	0.000242	0.000628
Tmem255a	transmembrane protein 255A	0.44	2.28e-05	0.000236	0.000614
Zc3hav1	zinc finger CCCH type, antiviral 1	3.82	2.27e-05	0.000236	0.000613
Fbxo24	F-box protein 24	4.47	2.21e-05	0.00023	0.000597
Kif4	kinesin family member 4	3.01	2.2e-05	0.000229	0.000595
Ms4a6d	membrane-spanning 4-domains, subfamily A, member 6D	5.03	2.16e-05	0.000226	0.000587
Tuba8	tubulin, alpha 8	0.2	2.17e-05	0.000226	0.000587
Acot9	acyl-CoA thioesterase 9	1.97	2.14e-05	0.000224	0.000581
Kif23	kinesin family member 23	3.52	2.1e-05	0.000221	0.000574
Cdk5r1	cyclin-dependent kinase 5, regulatory subunit 1 (p35)	0.61	2.02e-05	0.000213	0.000553
Ctla2b	cytotoxic T lymphocyte-associated protein 2 beta	4.98	2.03e-05	0.000213	0.000553
Smpd3	sphingomyelin phosphodiesterase 3, neutral	0.59	2.02e-05	0.000213	0.000553
Rasgef1b	RasGEF domain family, member 1B	0.51	2.01e-05	0.000212	0.000551
Pcsk1n	proprotein convertase subtilisin/kexin type 1 inhibitor	0.35	1.97e-05	0.000209	0.000543
Prss56	protease, serine 56	0.27	1.94e-05	0.000207	0.000536
Cybrd1	cytochrome b reductase 1	2.4	1.85e-05	0.000197	0.000513
Isl2	insulin related protein 2 (islet 2)	0.34	1.85e-05	0.000197	0.000513
Pilra	paired immunoglobin-like type 2 receptor alpha	2.57	1.81e-05	0.000194	0.000504
Cd109	CD109 antigen	4.43	1.79e-05	0.000192	0.000499
Chst10	carbohydrate sulfotransferase 10	0.51	1.79e-05	0.000192	0.000498
Ubald2	UBA-like domain containing 2	0.17	1.78e-05	0.000191	0.000496
Limk1	LIM-domain containing, protein kinase	0.47	1.77e-05	0.00019	0.000494
BC064078	cDNA sequence BC064078	2.09	1.76e-05	0.00019	0.000494
Prmt2	protein arginine N-methyltransferase 2	0.35	1.75e-05	0.000189	0.000491
Gm4285	predicted gene 4285	2.07	1.74e-05	0.000188	0.000489
Kcna6	potassium voltage-gated channel, shaker-related, subfamily, member 6	0.45	1.72e-05	0.000187	0.000486
Smyd3	SET and MYND domain containing 3	0.53	1.71e-05	0.000187	0.000485
Efna3	ephrin A3	0.13	1.71e-05	0.000187	0.000485
Dcaf12l1	DDB1 and CUL4 associated factor 12-like 1	0.43	1.72e-05	0.000187	0.000485
Hmgn5	high-mobility group nucleosome binding domain 5	2.4	1.67e-05	0.000183	0.000475
Lpar4	lysophosphatidic acid receptor 4	3.2	1.64e-05	0.00018	0.000466
Pcdha12	protocadherin alpha 12	0.34	1.62e-05	0.000178	0.000461
Pcsk9	proprotein convertase subtilisin/kexin type 9	0.27	1.6e-05	0.000176	0.000457
Sept5	septin 5	0.31	1.59e-05	0.000176	0.000456
Rac3	RAS-related C3 botulinum substrate 3	0.16	1.52e-05	0.000168	0.000437
Ccnd2	cyclin D2	4	1.42e-05	0.000158	0.00041
Aox1	aldehyde oxidase 1	9.03	1.39e-05	0.000155	0.000403
Pja1	praja1, RING-H2 motif containing	0.59	1.4e-05	0.000155	0.000403
Atxn7l3	ataxin 7-like 3	0.53	1.39e-05	0.000155	0.000402
Serp2	stress-associated endoplasmic reticulum protein family member 2	0.32	1.32e-05	0.000148	0.000384
Kcnmb1	potassium large conductance calcium-activated channel, subfamily M, beta member 1	6.12	1.3e-05	0.000146	0.000379
Rtn4r	reticulon 4 receptor	0.25	1.3e-05	0.000146	0.000378
Sptbn2	spectrin beta, non-erythrocytic 2	0.41	1.28e-05	0.000144	0.000374
Knstrn	kinetochore-localized astrin/SPAG5 binding	2.23	1.28e-05	0.000144	0.000374
Tfap2e	transcription factor AP-2, epsilon	0.29	1.27e-05	0.000144	0.000373
Cadm4	cell adhesion molecule 4	0.36	1.23e-05	0.000139	0.000361
Adamts9	a disintegrin-like and metallopeptidase (reprolysin type) with thrombospondin type 1 motif, 9	3.82	1.22e-05	0.000139	0.00036
St6galnac6	ST6 (alpha-N-acetyl-neuraminyl-2,3-beta-galactosyl-1,3)-N-acetylgalactosaminide alpha-2,6-sialyltransferase 6	0.38	1.21e-05	0.000137	0.000357
Cdc42ep4	CDC42 effector protein (Rho GTPase binding) 4	0.41	1.17e-05	0.000134	0.000347
Astn2	astrotactin 2	0.31	1.16e-05	0.000132	0.000344
Kndc1	kinase non-catalytic C-lobe domain (KIND) containing 1	0.29	1.16e-05	0.000132	0.000344
Brip1	BRCA1 interacting protein C-terminal helicase 1	2.55	1.13e-05	0.000129	0.000336
Notch4	notch 4	2.73	1.13e-05	0.000129	0.000336
Ttc9b	tetratricopeptide repeat domain 9B	0.16	1.1e-05	0.000127	0.00033
Anxa1	annexin A1	4.27	1.07e-05	0.000123	0.00032
Slc16a6	solute carrier family 16 (monocarboxylic acid transporters), member 6	2.91	1.01e-05	0.000117	0.000304
Stmn4	stathmin-like 4	0.4	1.01e-05	0.000117	0.000303
Gm7337	DAZ interacting protein 1 pseudogene	4.43	9.83e-06	0.000114	0.000297
6330403A02Rik	RIKEN cDNA 6330403A02 gene	0.35	9.25e-06	0.000108	0.00028
Vwc2	von Willebrand factor C domain containing 2	0.3	8.98e-06	0.000105	0.000273
Elavl4	ELAV (embryonic lethal, abnormal vision, Drosophila)-like 4 (Hu antigen D)	0.35	9.02e-06	0.000105	0.000273
2010109I03Rik	RIKEN cDNA 2010109I03 gene	4.7	8.8e-06	0.000103	0.000268
Atp6ap1l	ATPase, H+ transporting, lysosomal accessory protein 1-like	0.07	8.74e-06	0.000103	0.000267
Egr3	early growth response 3	4.48	8.62e-06	0.000101	0.000263
Pdxp	pyridoxal (pyridoxine, vitamin B6) phosphatase	0.26	8.56e-06	0.000101	0.000263
Fam174b	family with sequence similarity 174, member B	0.4	8.57e-06	0.000101	0.000263
Palm	paralemmin	0.25	8.48e-06	0.000101	0.000262
Irx2	Iroquois related homeobox 2 (Drosophila)	0.19	8.47e-06	0.000101	0.000262
Scn2b	sodium channel, voltage-gated, type II, beta	0.39	8.5e-06	0.000101	0.000262
B4galnt1	beta-1,4-N-acetyl-galactosaminyl transferase 1	0.37	8.34e-06	9.95e-05	0.000258
Rasgrp2	RAS, guanyl releasing protein 2	0.21	8.14e-06	9.73e-05	0.000253
Ddx60	DEAD (Asp-Glu-Ala-Asp) box polypeptide 60	4.64	7.74e-06	9.28e-05	0.000241
Zfpm2	zinc finger protein, multitype 2	0.51	7.6e-06	9.13e-05	0.000237
Slc2a13	solute carrier family 2 (facilitated glucose transporter), member 13	0.37	7.59e-06	9.13e-05	0.000237
Kcnk2	potassium channel, subfamily K, member 2	0.41	7.31e-06	8.82e-05	0.000229
Ccdc78	coiled-coil domain containing 78	4.72	7.3e-06	8.82e-05	0.000229
Prnd	prion protein dublet	2.71	7.3e-06	8.82e-05	0.000229
Nnat	neuronatin	0.36	7.15e-06	8.69e-05	0.000226
E030030I06Rik	RIKEN cDNA E030030I06 gene	2.93	6.8e-06	8.28e-05	0.000215
Ajap1	adherens junction associated protein 1	0.42	6.76e-06	8.26e-05	0.000214
Fabp3	fatty acid binding protein 3, muscle and heart	0.18	6.6e-06	8.08e-05	0.00021
Spock3	sparc/osteonectin, cwcv and kazal-like domains proteoglycan 3	0.37	6.6e-06	8.08e-05	0.00021
Cnih2	cornichon homolog 2 (Drosophila)	0.43	6.44e-06	7.92e-05	0.000206
Aqp6	aquaporin 6	0.07	6.16e-06	7.58e-05	0.000197
Fkbp1b	FK506 binding protein 1b	0.33	5.93e-06	7.32e-05	0.00019
H2afy3	H2A histone family, member Y3	4.28	5.88e-06	7.27e-05	0.000189
Ache	acetylcholinesterase	0.42	5.86e-06	7.27e-05	0.000189
Pkp1	plakophilin 1	0.27	5.77e-06	7.18e-05	0.000186
Gprin1	G protein-regulated inducer of neurite outgrowth 1	0.42	5.73e-06	7.14e-05	0.000185
Rnf187	ring finger protein 187	0.37	5.45e-06	6.81e-05	0.000177
Magee1	melanoma antigen, family E, 1	0.46	5.13e-06	6.42e-05	0.000167
Cd44	CD44 antigen	3.18	4.93e-06	6.18e-05	0.00016
Pfkm	phosphofructokinase, muscle	0.36	4.49e-06	5.65e-05	0.000147
Ndn	necdin	0.36	4.47e-06	5.64e-05	0.000146
Pcsk6	proprotein convertase subtilisin/kexin type 6	0.4	4.45e-06	5.63e-05	0.000146
Pcdhb9	protocadherin beta 9	0.49	4.42e-06	5.61e-05	0.000146
Necab3	N-terminal EF-hand calcium binding protein 3	0.35	4.4e-06	5.59e-05	0.000145
Prc1	protein regulator of cytokinesis 1	2.71	4.35e-06	5.54e-05	0.000144
Flt1	FMS-like tyrosine kinase 1	4.42	4.22e-06	5.38e-05	0.00014
Fam65b	family with sequence similarity 65, member B	0.32	4.09e-06	5.24e-05	0.000136
Reep5	receptor accessory protein 5	0.44	4.07e-06	5.22e-05	0.000136
Slc14a1	solute carrier family 14 (urea transporter), member 1	2.56	4.07e-06	5.22e-05	0.000136
Camkv	CaM kinase-like vesicle-associated	0.25	4.06e-06	5.22e-05	0.000136
Adamts5	a disintegrin-like and metallopeptidase (reprolysin type) with thrombospondin type 1 motif, 5 (aggrecanase-2)	2.35	3.97e-06	5.12e-05	0.000133
Tmem151b	transmembrane protein 151B	0.44	3.81e-06	4.93e-05	0.000128
Dbndd1	dysbindin (dystrobrevin binding protein 1) domain containing 1	0.21	3.77e-06	4.89e-05	0.000127
Slc10a4	solute carrier family 10 (sodium/bile acid cotransporter family), member 4	0.27	3.73e-06	4.86e-05	0.000126
Dbn1	drebrin 1	0.42	3.68e-06	4.8e-05	0.000125
Rph3a	rabphilin 3A	0.45	3.59e-06	4.7e-05	0.000122
Ywhah	tyrosine 3-monooxygenase/tryptophan 5-monooxygenase activation protein, eta polypeptide	0.45	3.58e-06	4.69e-05	0.000122
Dpysl5	dihydropyrimidinase-like 5	0.46	3.54e-06	4.65e-05	0.000121
Pip4k2b	phosphatidylinositol-5-phosphate 4-kinase, type II, beta	0.53	3.52e-06	4.63e-05	0.00012
Gng2	guanine nucleotide binding protein (G protein), gamma 2	0.41	3.44e-06	4.54e-05	0.000118
Gas2l3	growth arrest-specific 2 like 3	2.49	3.36e-06	4.45e-05	0.000115
Nfkbiz	nuclear factor of kappa light polypeptide gene enhancer in B cells inhibitor, zeta	3.22	3.3e-06	4.38e-05	0.000114
Ncs1	neuronal calcium sensor 1	0.43	3.23e-06	4.3e-05	0.000112
Adora1	adenosine A1 receptor	0.38	3.22e-06	4.29e-05	0.000111
Mal2	mal, T cell differentiation protein 2	0.29	3.15e-06	4.21e-05	0.000109
Fam19a2	family with sequence similarity 19, member A2	0.29	3.07e-06	4.13e-05	0.000107
Adap1	ArfGAP with dual PH domains 1	0.12	3.08e-06	4.13e-05	0.000107
Pkn3	protein kinase N3	6.15	3.04e-06	4.1e-05	0.000106
Ch25h	cholesterol 25-hydroxylase	13.78	3.02e-06	4.09e-05	0.000106
Gab3	growth factor receptor bound protein 2-associated protein 3	2.31	3.03e-06	4.09e-05	0.000106
Cxcl14	chemokine (C-X-C motif) ligand 14	0.31	2.96e-06	4.02e-05	0.000104
Spsb4	splA/ryanodine receptor domain and SOCS box containing 4	0.32	2.89e-06	3.94e-05	0.000102
Tfap2d	transcription factor AP-2, delta	0.22	2.86e-06	3.9e-05	0.000101
Arhgap29	Rho GTPase activating protein 29	3.36	2.85e-06	3.9e-05	0.000101
Arrb1	arrestin, beta 1	0.54	2.77e-06	3.8e-05	9.86e-05
Ephb2	Eph receptor B2	0.57	2.76e-06	3.79e-05	9.84e-05
Eno1	enolase 1, alpha non-neuron	0.21	2.64e-06	3.64e-05	9.45e-05
Tspyl3	TSPY-like 3	0.36	2.44e-06	3.37e-05	8.74e-05
Kif15	kinesin family member 15	3.41	2.4e-06	3.33e-05	8.64e-05
Rfx2	regulatory factor X, 2 (influences HLA class II expression)	3.41	2.38e-06	3.31e-05	8.59e-05
Nid1	nidogen 1	3.69	2.37e-06	3.3e-05	8.57e-05
Cav1	caveolin 1, caveolae protein	2.05	2.34e-06	3.27e-05	8.48e-05
Gvin1	GTPase, very large interferon inducible 1	4.28	2.33e-06	3.25e-05	8.45e-05
Plat	plasminogen activator, tissue	2.49	2.31e-06	3.24e-05	8.4e-05
Stil	Scl/Tal1 interrupting locus	5.74	2.24e-06	3.15e-05	8.18e-05
Pcdh19	protocadherin 19	0.48	2.23e-06	3.14e-05	8.15e-05
Grap2	GRB2-related adaptor protein 2	2.13	2.19e-06	3.09e-05	8.03e-05
Robo4	roundabout homolog 4 (Drosophila)	5.48	2.19e-06	3.09e-05	8.03e-05
Lingo2	leucine rich repeat and Ig domain containing 2	0.35	2.14e-06	3.04e-05	7.89e-05
Samd4	sterile alpha motif domain containing 4	2.94	2.08e-06	2.96e-05	7.69e-05
1700063D05Rik	RIKEN cDNA 1700063D05 gene	2.62	2e-06	2.87e-05	7.44e-05
Mapt	microtubule-associated protein tau	0.53	1.99e-06	2.85e-05	7.4e-05
Atad2	ATPase family, AAA domain containing 2	2.89	1.98e-06	2.84e-05	7.37e-05
Necab1	N-terminal EF-hand calcium binding protein 1	0.32	1.88e-06	2.72e-05	7.05e-05
A330032B11Rik	RIKEN cDNA A330032B11 gene	3.34	1.86e-06	2.69e-05	7e-05
Fam110b	family with sequence similarity 110, member B	0.25	1.86e-06	2.69e-05	7e-05
Cacnb3	calcium channel, voltage-dependent, beta 3 subunit	0.47	1.85e-06	2.69e-05	6.98e-05
Cxx1c	CAAX box 1C	0.34	1.83e-06	2.66e-05	6.92e-05
Capn5	calpain 5	0.3	1.76e-06	2.58e-05	6.69e-05
Cdh22	cadherin 22	0.32	1.72e-06	2.52e-05	6.53e-05
Clvs2	clavesin 2	0.13	1.69e-06	2.49e-05	6.45e-05
Rab15	RAB15, member RAS oncogene family	0.32	1.65e-06	2.43e-05	6.3e-05
Dtx1	deltex 1 homolog (Drosophila)	0.42	1.62e-06	2.39e-05	6.22e-05
BC048546	cDNA sequence BC048546	0.21	1.59e-06	2.35e-05	6.11e-05
Atl1	atlastin GTPase 1	0.47	1.56e-06	2.31e-05	6e-05
Fibcd1	fibrinogen C domain containing 1	0.25	1.52e-06	2.26e-05	5.87e-05
Col4a1	collagen, type IV, alpha 1	3.49	1.48e-06	2.22e-05	5.76e-05
Tubb2a	tubulin, beta 2A class IIA	0.26	1.44e-06	2.16e-05	5.62e-05
Gabbr2	gamma-aminobutyric acid (GABA) B receptor, 2	0.39	1.41e-06	2.12e-05	5.51e-05
Kcnc4	potassium voltage gated channel, Shaw-related subfamily, member 4	0.23	1.35e-06	2.04e-05	5.3e-05
Panx1	pannexin 1	0.44	1.35e-06	2.03e-05	5.28e-05
Mmrn2	multimerin 2	3.94	1.3e-06	1.97e-05	5.11e-05
Lrrc14b	leucine rich repeat containing 14B	5.11	1.26e-06	1.92e-05	4.98e-05
Calca	calcitonin/calcitonin-related polypeptide, alpha	7.69	1.24e-06	1.89e-05	4.91e-05
A630089N07Rik	RIKEN cDNA A630089N07 gene	4.19	1.22e-06	1.87e-05	4.85e-05
Fosl1	fos-like antigen 1	10.07	1.17e-06	1.8e-05	4.67e-05
Pianp	PILR alpha associated neural protein	0.33	1.16e-06	1.78e-05	4.62e-05
Scrt1	scratch homolog 1, zinc finger protein (Drosophila)	0.42	1.13e-06	1.74e-05	4.51e-05
Cenpf	centromere protein F	2.83	1.1e-06	1.7e-05	4.42e-05
Pcdh8	protocadherin 8	0.42	1.08e-06	1.68e-05	4.36e-05
Vmn2r55	vomeronasal 2, receptor 55	5.46	1.08e-06	1.68e-05	4.36e-05
Tubb3	tubulin, beta 3 class III	0.21	1.08e-06	1.68e-05	4.36e-05
Phyhipl	phytanoyl-CoA hydroxylase interacting protein-like	0.54	9.81e-07	1.53e-05	3.98e-05
Srd5a1	steroid 5 alpha-reductase 1	0.41	9.73e-07	1.53e-05	3.96e-05
Tagln3	transgelin 3	0.19	9.62e-07	1.51e-05	3.93e-05
Hpcal4	hippocalcin-like 4	0.34	9.5e-07	1.5e-05	3.89e-05
Ctla2a	cytotoxic T lymphocyte-associated protein 2 alpha	4.15	9.43e-07	1.49e-05	3.87e-05
Coro2a	coronin, actin binding protein 2A	0.29	9.42e-07	1.49e-05	3.87e-05
Bub1	budding uninhibited by benzimidazoles 1 homolog (S. cerevisiae)	2.87	9.19e-07	1.46e-05	3.8e-05
Vstm2l	V-set and transmembrane domain containing 2-like	0.27	9.21e-07	1.46e-05	3.8e-05
Lamp3	lysosomal-associated membrane protein 3	5.64	8.94e-07	1.43e-05	3.71e-05
Nuf2	NUF2, NDC80 kinetochore complex component, homolog (S. cerevisiae)	2.86	8.08e-07	1.3e-05	3.37e-05
Dlgap3	discs, large (Drosophila) homolog-associated protein 3	0.43	7.79e-07	1.25e-05	3.26e-05
Grk1	G protein-coupled receptor kinase 1	1.9	7.62e-07	1.23e-05	3.2e-05
Gm4070	predicted gene 4070	4.25	7.32e-07	1.19e-05	3.08e-05
Ap2b1	adaptor-related protein complex 2, beta 1 subunit	0.53	6.89e-07	1.12e-05	2.91e-05
Galntl6	UDP-N-acetyl-alpha-D-galactosamine:polypeptide N-acetylgalactosaminyltransferase-like 6	0.34	6.79e-07	1.11e-05	2.87e-05
Rbpms	RNA binding protein gene with multiple splicing	0.32	6.73e-07	1.1e-05	2.86e-05
Nrip3	nuclear receptor interacting protein 3	0.36	6.53e-07	1.07e-05	2.78e-05
Nptx2	neuronal pentraxin 2	0.4	6.43e-07	1.06e-05	2.75e-05
Slc16a3	solute carrier family 16 (monocarboxylic acid transporters), member 3	0.33	6.19e-07	1.02e-05	2.65e-05
Rap1gap	Rap1 GTPase-activating protein	0.43	5.93e-07	9.82e-06	2.55e-05
Grin1	glutamate receptor, ionotropic, NMDA1 (zeta 1)	0.37	5.8e-07	9.64e-06	2.5e-05
Chrnb2	cholinergic receptor, nicotinic, beta polypeptide 2 (neuronal)	0.51	5.36e-07	8.92e-06	2.32e-05
Btbd11	BTB (POZ) domain containing 11	0.36	5.29e-07	8.84e-06	2.29e-05
Gpr37	G protein-coupled receptor 37	0.5	5.23e-07	8.76e-06	2.27e-05
Kcns2	K+ voltage-gated channel, subfamily S, 2	0.21	5.18e-07	8.71e-06	2.26e-05
Nrg3	neuregulin 3	0.42	5.1e-07	8.59e-06	2.23e-05
Pcdh10	protocadherin 10	0.39	5.03e-07	8.52e-06	2.21e-05
Slco1c1	solute carrier organic anion transporter family, member 1c1	0.29	4.74e-07	8.04e-06	2.09e-05
Dact2	dapper homolog 2, antagonist of beta-catenin (xenopus)	0.18	4.62e-07	7.87e-06	2.04e-05
Hs3st1	heparan sulfate (glucosamine) 3-O-sulfotransferase 1	0.28	4.58e-07	7.82e-06	2.03e-05
Sept6	septin 6	0.47	4.51e-07	7.73e-06	2.01e-05
Gfra4	glial cell line derived neurotrophic factor family receptor alpha 4	0.27	4.42e-07	7.6e-06	1.97e-05
Ppp1r14c	protein phosphatase 1, regulatory (inhibitor) subunit 14c	0.32	3.95e-07	6.81e-06	1.77e-05
Nox4	NADPH oxidase 4	3.77	3.83e-07	6.63e-06	1.72e-05
Hs3st5	heparan sulfate (glucosamine) 3-O-sulfotransferase 5	0.41	3.66e-07	6.36e-06	1.65e-05
Mmp24	matrix metallopeptidase 24	0.46	3.66e-07	6.36e-06	1.65e-05
Slc18a3	solute carrier family 18 (vesicular monoamine), member 3	0.13	3.62e-07	6.33e-06	1.64e-05
Ctnnd2	catenin (cadherin associated protein), delta 2	0.44	3.57e-07	6.26e-06	1.63e-05
Slc6a17	solute carrier family 6 (neurotransmitter transporter), member 17	0.3	3.53e-07	6.21e-06	1.61e-05
Atcay	ataxia, cerebellar, Cayman type homolog (human)	0.37	3.44e-07	6.08e-06	1.58e-05
Stx1b	syntaxin 1B	0.34	3.24e-07	5.74e-06	1.49e-05
Glul	glutamate-ammonia ligase (glutamine synthetase)	0.4	3e-07	5.33e-06	1.38e-05
Mki67	antigen identified by monoclonal antibody Ki 67	4.33	2.95e-07	5.26e-06	1.37e-05
Ppp2r2c	protein phosphatase 2, regulatory subunit B, gamma	0.38	2.91e-07	5.21e-06	1.35e-05
Sbk1	SH3-binding kinase 1	0.47	2.78e-07	4.99e-06	1.29e-05
Kcnj5	potassium inwardly-rectifying channel, subfamily J, member 5	0.24	2.74e-07	4.94e-06	1.28e-05
Il1r1	interleukin 1 receptor, type I	4.06	2.7e-07	4.88e-06	1.27e-05
Sult4a1	sulfotransferase family 4A, member 1	0.17	2.65e-07	4.81e-06	1.25e-05
Ppp1r17	protein phosphatase 1, regulatory subunit 17	0.38	2.5e-07	4.54e-06	1.18e-05
Coch	coagulation factor C homolog (Limulus polyphemus)	0.3	2.28e-07	4.16e-06	1.08e-05
Panx2	pannexin 2	0.36	2.18e-07	3.99e-06	1.04e-05
9330188P03Rik	RIKEN cDNA 9330188P03 gene	4.85	2.07e-07	3.81e-06	9.88e-06
Lama4	laminin, alpha 4	4.84	2.04e-07	3.76e-06	9.77e-06
Gng3	guanine nucleotide binding protein (G protein), gamma 3	0.4	1.98e-07	3.67e-06	9.52e-06
Fam196b	family with sequence similarity 196, member B	0.21	1.75e-07	3.25e-06	8.43e-06
Kcne1l	potassium voltage-gated channel, Isk-related family, member 1-like, pseudogene	0.39	1.74e-07	3.24e-06	8.42e-06
B3gat2	beta-1,3-glucuronyltransferase 2 (glucuronosyltransferase S)	0.36	1.63e-07	3.05e-06	7.92e-06
Sncg	synuclein, gamma	0.15	1.6e-07	3.01e-06	7.81e-06
Fbxo21	F-box protein 21	0.55	1.6e-07	3.01e-06	7.81e-06
Basp1	brain abundant, membrane attached signal protein 1	0.51	1.57e-07	2.98e-06	7.73e-06
Mcam	melanoma cell adhesion molecule	5.03	1.58e-07	2.98e-06	7.73e-06
Eomes	eomesodermin homolog (Xenopus laevis)	0.25	1.5e-07	2.85e-06	7.4e-06
Nab2	Ngfi-A binding protein 2	2.35	1.48e-07	2.82e-06	7.33e-06
Col15a1	collagen, type XV, alpha 1	5.47	1.42e-07	2.72e-06	7.06e-06
Ptprn2	protein tyrosine phosphatase, receptor type, N polypeptide 2	0.47	1.35e-07	2.59e-06	6.73e-06
Glra2	glycine receptor, alpha 2 subunit	0.26	1.31e-07	2.53e-06	6.56e-06
Thbs1	thrombospondin 1	4.7	1.3e-07	2.52e-06	6.54e-06
Fam111a	family with sequence similarity 111, member A	3.13	1.29e-07	2.51e-06	6.52e-06
Gnal	guanine nucleotide binding protein, alpha stimulating, olfactory type	0.41	1.22e-07	2.38e-06	6.17e-06
Stmn1	stathmin 1	0.33	1.16e-07	2.28e-06	5.91e-06
Tcerg1l	transcription elongation regulator 1-like	0.3	1.16e-07	2.28e-06	5.91e-06
Cpne5	copine V	0.26	1.08e-07	2.13e-06	5.52e-06
Shisa8	expressed sequence AI848285	0.24	1.01e-07	2e-06	5.19e-06
Fxyd5	FXYD domain-containing ion transport regulator 5	5.33	1.01e-07	2e-06	5.19e-06
Faim2	Fas apoptotic inhibitory molecule 2	0.27	9.75e-08	1.95e-06	5.05e-06
Ncapg	non-SMC condensin I complex, subunit G	2.97	9.35e-08	1.87e-06	4.86e-06
Tfpi2	tissue factor pathway inhibitor 2	7.95	9.26e-08	1.86e-06	4.83e-06
6430548M08Rik	RIKEN cDNA 6430548M08 gene	0.49	9.01e-08	1.82e-06	4.72e-06
BC039771	cDNA sequence BC039771	3.71	8.92e-08	1.81e-06	4.69e-06
Ebf1	early B cell factor 1	0.39	8.81e-08	1.79e-06	4.65e-06
Csdc2	cold shock domain containing C2, RNA binding	0.32	8.78e-08	1.79e-06	4.65e-06
Prkar1b	protein kinase, cAMP dependent regulatory, type I beta	0.28	8.74e-08	1.79e-06	4.65e-06
Marcksl1	MARCKS-like 1	0.37	8.67e-08	1.78e-06	4.63e-06
Pecam1	platelet/endothelial cell adhesion molecule 1	4.11	7.92e-08	1.64e-06	4.25e-06
Vgf	VGF nerve growth factor inducible	0.23	7.18e-08	1.49e-06	3.86e-06
Fos	FBJ osteosarcoma oncogene	3.38	6.92e-08	1.44e-06	3.74e-06
Tbc1d16	TBC1 domain family, member 16	0.48	6.8e-08	1.42e-06	3.69e-06
Slc18a2	solute carrier family 18 (vesicular monoamine), member 2	0.2	6.63e-08	1.39e-06	3.61e-06
Spry4	sprouty homolog 4 (Drosophila)	3.11	6.02e-08	1.27e-06	3.29e-06
Phactr3	phosphatase and actin regulator 3	0.41	6e-08	1.27e-06	3.29e-06
Gabra4	gamma-aminobutyric acid (GABA) A receptor, subunit alpha 4	0.28	5.87e-08	1.24e-06	3.23e-06
Tnfaip8	tumor necrosis factor, alpha-induced protein 8	2.9	5.64e-08	1.21e-06	3.13e-06
Sprn	shadow of prion protein	0.38	5.67e-08	1.21e-06	3.13e-06
Slfn9	schlafen 9	5.4	5.52e-08	1.18e-06	3.08e-06
Aplp1	amyloid beta (A4) precursor-like protein 1	0.27	5.42e-08	1.17e-06	3.04e-06
2810417H13Rik	RIKEN cDNA 2810417H13 gene	3.25	5.41e-08	1.17e-06	3.04e-06
Fez1	fasciculation and elongation protein zeta 1 (zygin I)	0.27	5.32e-08	1.16e-06	3e-06
Rgs4	regulator of G-protein signaling 4	0.26	5.26e-08	1.15e-06	2.99e-06
Shisa3	shisa homolog 3 (Xenopus laevis)	6.03	5.27e-08	1.15e-06	2.99e-06
Sobp	sine oculis-binding protein homolog (Drosophila)	0.45	4.92e-08	1.08e-06	2.81e-06
Crabp1	cellular retinoic acid binding protein I	0.23	4.83e-08	1.07e-06	2.77e-06
Wbscr17	Williams-Beuren syndrome chromosome region 17 homolog (human)	0.24	4.76e-08	1.06e-06	2.74e-06
Chn2	chimerin 2	0.42	4.74e-08	1.06e-06	2.74e-06
Angpt2	angiopoietin 2	4.72	4.54e-08	1.02e-06	2.64e-06
Pnma2	paraneoplastic antigen MA2	0.38	4.48e-08	1.01e-06	2.61e-06
Epb4.1l4a	erythrocyte protein band 4.1-like 4a	0.43	4.46e-08	1.01e-06	2.61e-06
Zmat4	zinc finger, matrin type 4	0.32	4.47e-08	1.01e-06	2.61e-06
Pdgfb	platelet derived growth factor, B polypeptide	3.87	4.39e-08	9.99e-07	2.59e-06
Piezo2	piezo-type mechanosensitive ion channel component 2	4.92	4.38e-08	9.99e-07	2.59e-06
Gimap9	GTPase, IMAP family member 9	5.57	4.17e-08	9.6e-07	2.49e-06
Fxyd7	FXYD domain-containing ion transport regulator 7	0.17	4.18e-08	9.6e-07	2.49e-06
F3	coagulation factor III	3.46	3.99e-08	9.23e-07	2.4e-06
Pnoc	prepronociceptin	0.21	3.96e-08	9.21e-07	2.39e-06
Pak1	p21 protein (Cdc42/Rac)-activated kinase 1	0.48	3.93e-08	9.17e-07	2.38e-06
Dok5	docking protein 5	0.27	3.87e-08	9.08e-07	2.36e-06
Slc29a4	solute carrier family 29 (nucleoside transporters), member 4	0.36	3.84e-08	9.05e-07	2.35e-06
Rab3b	RAB3B, member RAS oncogene family	0.18	3.82e-08	9.03e-07	2.35e-06
A330076H08Rik	RIKEN cDNA A330076H08 gene	3	3.59e-08	8.53e-07	2.21e-06
Ankrd34a	ankyrin repeat domain 34A	0.29	3.43e-08	8.2e-07	2.13e-06
Resp18	regulated endocrine-specific protein 18	0.13	3.4e-08	8.14e-07	2.11e-06
Erg	avian erythroblastosis virus E-26 (v-ets) oncogene related	4.73	3.39e-08	8.14e-07	2.11e-06
Sh3gl3	SH3-domain GRB2-like 3	0.37	3.37e-08	8.14e-07	2.11e-06
Gm10825	predicted gene 10825	7.05	3.31e-08	8.04e-07	2.09e-06
Gng7	guanine nucleotide binding protein (G protein), gamma 7	0.33	2.98e-08	7.29e-07	1.89e-06
Chrna4	cholinergic receptor, nicotinic, alpha polypeptide 4	0.34	2.95e-08	7.25e-07	1.88e-06
Gm6634	predicted gene 6634	18.26	2.95e-08	7.25e-07	1.88e-06
Igfbpl1	insulin-like growth factor binding protein-like 1	0.14	2.95e-08	7.25e-07	1.88e-06
C1ql1	complement component 1, q subcomponent-like 1	0.34	2.62e-08	6.53e-07	1.7e-06
Zcchc12	zinc finger, CCHC domain containing 12	0.31	2.63e-08	6.53e-07	1.7e-06
Gsg1l	GSG1-like	0.41	2.55e-08	6.4e-07	1.66e-06
Add2	adducin 2 (beta)	0.43	2.53e-08	6.38e-07	1.66e-06
Arhgap44	Rho GTPase activating protein 44	0.44	2.4e-08	6.08e-07	1.58e-06
Bcl6b	B cell CLL/lymphoma 6, member B	4.63	2.37e-08	6.05e-07	1.57e-06
Tunar	Tcl1 upstream neural differentiation associated RNA	0.34	2.35e-08	6.02e-07	1.56e-06
Nyap1	neuronal tyrosine-phosphorylated phosphoinositide 3-kinase adaptor 1	0.34	2.33e-08	6e-07	1.56e-06
Olfm1	olfactomedin 1	0.55	2.26e-08	5.83e-07	1.51e-06
Cpne4	copine IV	0.2	2.26e-08	5.83e-07	1.51e-06
Rap1gap2	RAP1 GTPase activating protein 2	0.43	2.2e-08	5.73e-07	1.49e-06
Dpp6	dipeptidylpeptidase 6	0.37	2.18e-08	5.71e-07	1.48e-06
Caly	calcyon neuron-specific vesicular protein	0.23	1.9e-08	5.01e-07	1.3e-06
Fam43b	family with sequence similarity 43, member B	0.16	1.85e-08	4.89e-07	1.27e-06
U90926	cDNA sequence U90926	6.36	1.84e-08	4.89e-07	1.27e-06
Fam167b	family with sequence similarity 167, member B	8.32	1.8e-08	4.81e-07	1.25e-06
Tubb4a	tubulin, beta 4A class IVA	0.27	1.71e-08	4.58e-07	1.19e-06
Mlkl	mixed lineage kinase domain-like	8.75	1.7e-08	4.58e-07	1.19e-06
Casc5	cancer susceptibility candidate 5	4.8	1.68e-08	4.57e-07	1.19e-06
Npcd	neuronal pentraxin chromo domain	0.5	1.67e-08	4.56e-07	1.18e-06
Cbln4	cerebellin 4 precursor protein	0.23	1.59e-08	4.37e-07	1.13e-06
Tmem179	transmembrane protein 179	0.19	1.54e-08	4.24e-07	1.1e-06
Shh	sonic hedgehog	0.1	1.5e-08	4.16e-07	1.08e-06
Spock1	sparc/osteonectin, cwcv and kazal-like domains proteoglycan 1	0.3	1.37e-08	3.81e-07	9.88e-07
Slc2a3	solute carrier family 2 (facilitated glucose transporter), member 3	0.45	1.35e-08	3.79e-07	9.83e-07
Galnt16	UDP-N-acetyl-alpha-D-galactosamine:polypeptide N-acetylgalactosaminyltransferase 16	0.32	1.28e-08	3.61e-07	9.37e-07
Pou4f2	POU domain, class 4, transcription factor 2	0.14	1.28e-08	3.61e-07	9.37e-07
Ak5	adenylate kinase 5	0.13	1.24e-08	3.53e-07	9.17e-07
Vsnl1	visinin-like 1	0.3	1.19e-08	3.4e-07	8.82e-07
Itgb3	integrin beta 3	7.77	1.16e-08	3.34e-07	8.68e-07
Trim32	tripartite motif-containing 32	0.46	1.16e-08	3.34e-07	8.68e-07
Syt5	synaptotagmin V	0.17	1.16e-08	3.34e-07	8.68e-07
Myct1	myc target 1	5.36	1.13e-08	3.32e-07	8.61e-07
Grm2	glutamate receptor, metabotropic 2	0.19	1.08e-08	3.17e-07	8.23e-07
Gpr88	G-protein coupled receptor 88	0.16	1.05e-08	3.11e-07	8.08e-07
Dync1i1	dynein cytoplasmic 1 intermediate chain 1	0.31	1.03e-08	3.07e-07	7.97e-07
Snn	stannin	0.49	9.81e-09	2.93e-07	7.61e-07
Cdk14	cyclin-dependent kinase 14	0.35	9.81e-09	2.93e-07	7.61e-07
Prkar2b	protein kinase, cAMP dependent regulatory, type II beta	0.41	9.63e-09	2.91e-07	7.55e-07
Slc38a5	solute carrier family 38, member 5	0.08	9.26e-09	2.81e-07	7.31e-07
Cend1	cell cycle exit and neuronal differentiation 1	0.32	9.19e-09	2.81e-07	7.29e-07
Ablim2	actin-binding LIM protein 2	0.37	8.5e-09	2.61e-07	6.78e-07
Nrn1	neuritin 1	0.14	7.51e-09	2.32e-07	6.02e-07
6030419C18Rik	RIKEN cDNA 6030419C18 gene	0.33	7.48e-09	2.32e-07	6.02e-07
Stk32c	serine/threonine kinase 32C	0.12	7.1e-09	2.22e-07	5.77e-07
Gpr158	G protein-coupled receptor 158	0.33	6.64e-09	2.09e-07	5.42e-07
Ebf3	early B cell factor 3	0.27	6.32e-09	2e-07	5.19e-07
Rbfox1	RNA binding protein, fox-1 homolog (C. elegans) 1	0.34	6.05e-09	1.93e-07	5e-07
Tpm4	tropomyosin 4	2.98	5.47e-09	1.76e-07	4.56e-07
Fendrr	Foxf1 adjacent non-coding developmental regulatory RNA	13.01	5.49e-09	1.76e-07	4.56e-07
Rhbdl2	rhomboid, veinlet-like 2 (Drosophila)	7.66	5.31e-09	1.72e-07	4.46e-07
Slc17a6	solute carrier family 17 (sodium-dependent inorganic phosphate cotransporter), member 6	0.12	4.93e-09	1.62e-07	4.2e-07
Gabra3	gamma-aminobutyric acid (GABA) A receptor, subunit alpha 3	0.33	4.96e-09	1.62e-07	4.2e-07
Diras1	DIRAS family, GTP-binding RAS-like 1	0.15	4.79e-09	1.58e-07	4.11e-07
Asic1	acid-sensing (proton-gated) ion channel 1	0.33	4.41e-09	1.47e-07	3.81e-07
Prdm13	PR domain containing 13	0.37	3.95e-09	1.32e-07	3.42e-07
Cx3cl1	chemokine (C-X3-C motif) ligand 1	0.29	3.66e-09	1.23e-07	3.2e-07
Nr1h4	nuclear receptor subfamily 1, group H, member 4	3.85	3.51e-09	1.19e-07	3.08e-07
AI662270	expressed sequence AI662270	22.64	3.46e-09	1.18e-07	3.06e-07
Csrp3	cysteine and glycine-rich protein 3	0.1	3.45e-09	1.18e-07	3.06e-07
Plaur	plasminogen activator, urokinase receptor	13.2	3.39e-09	1.17e-07	3.04e-07
Msn	moesin	3.96	3.33e-09	1.16e-07	3e-07
Asic2	acid-sensing (proton-gated) ion channel 2	0.28	2.93e-09	1.02e-07	2.66e-07
Nrsn1	neurensin 1	0.32	2.87e-09	1.01e-07	2.62e-07
Irx4	Iroquois related homeobox 4 (Drosophila)	0.13	2.75e-09	9.75e-08	2.53e-07
Tmem178	transmembrane protein 178	0.29	2.73e-09	9.74e-08	2.53e-07
Fgf14	fibroblast growth factor 14	0.35	2.48e-09	8.91e-08	2.31e-07
Stmn2	stathmin-like 2	0.24	2.48e-09	8.91e-08	2.31e-07
Jph3	junctophilin 3	0.29	2.42e-09	8.82e-08	2.29e-07
Lynx1	Ly6/neurotoxin 1	0.15	2.31e-09	8.45e-08	2.19e-07
Rab6b	RAB6B, member RAS oncogene family	0.49	2.17e-09	7.99e-08	2.07e-07
Scn1b	sodium channel, voltage-gated, type I, beta	0.19	2.09e-09	7.76e-08	2.02e-07
Top2a	topoisomerase (DNA) II alpha	3.66	1.89e-09	7.06e-08	1.83e-07
Pnmal2	PNMA-like 2	0.44	1.75e-09	6.59e-08	1.71e-07
Apln	apelin	6.61	1.72e-09	6.54e-08	1.7e-07
Rasgrf1	RAS protein-specific guanine nucleotide-releasing factor 1	0.26	1.67e-09	6.37e-08	1.65e-07
Cyr61	cysteine rich protein 61	5.95	1.64e-09	6.3e-08	1.64e-07
Klhl6	kelch-like 6	4.21	1.3e-09	5.04e-08	1.31e-07
Galnt9	UDP-N-acetyl-alpha-D-galactosamine:polypeptide N-acetylgalactosaminyltransferase 9	0.14	1.3e-09	5.04e-08	1.31e-07
Larp6	La ribonucleoprotein domain family, member 6	0.17	1.21e-09	4.76e-08	1.23e-07
Slc24a3	solute carrier family 24 (sodium/potassium/calcium exchanger), member 3	0.39	1.08e-09	4.27e-08	1.11e-07
Adamts1	a disintegrin-like and metallopeptidase (reprolysin type) with thrombospondin type 1 motif, 1	4.85	1.04e-09	4.19e-08	1.09e-07
Kcna5	potassium voltage-gated channel, shaker-related subfamily, member 5	0.36	1.05e-09	4.19e-08	1.09e-07
Trpc6	transient receptor potential cation channel, subfamily C, member 6	3.81	9.64e-10	3.9e-08	1.01e-07
Fxyd6	FXYD domain-containing ion transport regulator 6	0.12	9.02e-10	3.68e-08	9.56e-08
Tnfaip2	tumor necrosis factor, alpha-induced protein 2	7.98	8.28e-10	3.43e-08	8.9e-08
Adcyap1	adenylate cyclase activating polypeptide 1	0.09	8.34e-10	3.43e-08	8.9e-08
Kctd8	potassium channel tetramerisation domain containing 8	0.3	7.26e-10	3.03e-08	7.87e-08
Msr1	macrophage scavenger receptor 1	13.27	6.92e-10	2.91e-08	7.56e-08
Pou4f1	POU domain, class 4, transcription factor 1	0.23	6.86e-10	2.91e-08	7.55e-08
Tfap2c	transcription factor AP-2, gamma	0.32	5.63e-10	2.41e-08	6.25e-08
Cbln2	cerebellin 2 precursor protein	0.2	4.63e-10	2e-08	5.18e-08
Gm13889	predicted gene 13889	0.33	4.29e-10	1.86e-08	4.84e-08
Dpysl4	dihydropyrimidinase-like 4	0.43	3.58e-10	1.57e-08	4.07e-08
Cplx1	complexin 1	0.24	3.53e-10	1.56e-08	4.05e-08
Adcy2	adenylate cyclase 2	0.48	2.78e-10	1.24e-08	3.21e-08
Cd93	CD93 antigen	6.72	2.75e-10	1.24e-08	3.21e-08
Ctgf	connective tissue growth factor	5.62	2.62e-10	1.19e-08	3.09e-08
Tmem151a	transmembrane protein 151A	0.2	2.61e-10	1.19e-08	3.09e-08
Atp1b1	ATPase, Na+/K+ transporting, beta 1 polypeptide	0.29	2.39e-10	1.1e-08	2.86e-08
Tnfrsf11b	tumor necrosis factor receptor superfamily, member 11b (osteoprotegerin)	10.75	2.37e-10	1.1e-08	2.86e-08
Slc8a2	solute carrier family 8 (sodium/calcium exchanger), member 2	0.35	2.34e-10	1.1e-08	2.85e-08
Ccdc184	expressed sequence AI836003	0.11	2.15e-10	1.02e-08	2.64e-08
Btnl9	butyrophilin-like 9	26.33	2.09e-10	9.98e-09	2.59e-08
Foxd2os	forkhead box D2, opposite strand	10.32	1.96e-10	9.44e-09	2.45e-08
Tppp	tubulin polymerization promoting protein	0.29	1.68e-10	8.18e-09	2.12e-08
Arl4c	ADP-ribosylation factor-like 4C	0.35	1.66e-10	8.14e-09	2.11e-08
Syt16	synaptotagmin XVI	0.34	1.53e-10	7.59e-09	1.97e-08
Syn2	synapsin II	0.19	1.49e-10	7.58e-09	1.97e-08
Cacng3	calcium channel, voltage-dependent, gamma subunit 3	0.29	1.52e-10	7.58e-09	1.97e-08
Anln	anillin, actin binding protein	4.85	1.51e-10	7.58e-09	1.97e-08
Mis18bp1	MIS18 binding protein 1	4.19	1.35e-10	6.93e-09	1.8e-08
Snord116	small nucleolar RNA, C/D box 116; small nucleolar RNA, C/D box 116 cluster	35.37	1.32e-10	6.86e-09	1.78e-08
Snord116l1	small nucleolar RNA, C/D box 116-like 1	35.37	1.32e-10	6.86e-09	1.78e-08
Snord116l2	small nucleolar RNA, C/D box 116-like 2	35.37	1.32e-10	6.86e-09	1.78e-08
Oprl1	opioid receptor-like 1	0.2	1.17e-10	6.24e-09	1.62e-08
Brinp2	bone morphogenic protein/retinoic acid inducible neural-specific 2	0.35	1.11e-10	6e-09	1.56e-08
Cemip	cell migration inducing protein, hyaluronan binding	0.26	9.21e-11	5.03e-09	1.31e-08
Maff	v-maf musculoaponeurotic fibrosarcoma oncogene family, protein F (avian)	6.03	8.23e-11	4.54e-09	1.18e-08
Gap43	growth associated protein 43	0.32	7.41e-11	4.13e-09	1.07e-08
Calb2	calbindin 2	0.09	7.01e-11	3.95e-09	1.02e-08
Ankrd1	ankyrin repeat domain 1 (cardiac muscle)	564.63	6e-11	3.41e-09	8.86e-09
Apba1	amyloid beta (A4) precursor protein binding, family A, member 1	0.44	5.67e-11	3.26e-09	8.46e-09
Slc1a6	solute carrier family 1 (high affinity aspartate/glutamate transporter), member 6	0.16	4.84e-11	2.81e-09	7.31e-09
2900011O08Rik	RIKEN cDNA 2900011O08 gene	0.38	4.8e-11	2.81e-09	7.31e-09
Tslp	thymic stromal lymphopoietin	34.97	4.35e-11	2.59e-09	6.71e-09
Nostrin	nitric oxide synthase trafficker	3.89	3.97e-11	2.39e-09	6.19e-09
Jakmip1	janus kinase and microtubule interacting protein 1	0.31	3.91e-11	2.38e-09	6.17e-09
Chrnb3	cholinergic receptor, nicotinic, beta polypeptide 3	0.19	3.73e-11	2.29e-09	5.95e-09
Tac1	tachykinin 1	0.26	3.28e-11	2.04e-09	5.3e-09
Ndrg4	N-myc downstream regulated gene 4	0.37	2.79e-11	1.75e-09	4.56e-09
Myo16	myosin XVI	0.27	2.12e-11	1.35e-09	3.51e-09
Ywhag	tyrosine 3-monooxygenase/tryptophan 5-monooxygenase activation protein, gamma polypeptide	0.44	2.01e-11	1.3e-09	3.37e-09
Gng4	guanine nucleotide binding protein (G protein), gamma 4	0.14	1.94e-11	1.27e-09	3.29e-09
Nefm	neurofilament, medium polypeptide	0.34	1.88e-11	1.24e-09	3.21e-09
Lamp5	lysosomal-associated membrane protein family, member 5	0.37	1.66e-11	1.11e-09	2.88e-09
Ier5	immediate early response 5	0.38	1.26e-11	8.55e-10	2.22e-09
Syt6	synaptotagmin VI	0.27	1.12e-11	7.71e-10	2e-09
Cacng5	calcium channel, voltage-dependent, gamma subunit 5	0.17	9.48e-12	6.59e-10	1.71e-09
Nhlh2	nescient helix loop helix 2	0.29	9.41e-12	6.59e-10	1.71e-09
Crmp1	collapsin response mediator protein 1	0.34	9.12e-12	6.5e-10	1.69e-09
Cd34	CD34 antigen	4.14	8.08e-12	5.84e-10	1.52e-09
Nr4a3	nuclear receptor subfamily 4, group A, member 3	9.85	6.34e-12	4.64e-10	1.21e-09
Cartpt	CART prepropeptide	0.33	6.04e-12	4.49e-10	1.16e-09
Mycl	v-myc myelocytomatosis viral oncogene homolog, lung carcinoma derived (avian)	0.24	4.72e-12	3.55e-10	9.22e-10
Fam131b	family with sequence similarity 131, member B	0.23	4.67e-12	3.55e-10	9.22e-10
Gm14005	predicted gene 14005	4.42	3.91e-12	3.03e-10	7.88e-10
Hmmr	hyaluronan mediated motility receptor (RHAMM)	4.45	3.69e-12	2.9e-10	7.54e-10
Chrna6	cholinergic receptor, nicotinic, alpha polypeptide 6	0.22	3.14e-12	2.51e-10	6.51e-10
Cbln1	cerebellin 1 precursor protein	0.13	2.62e-12	2.12e-10	5.52e-10
Nkain1	Na+/K+ transporting ATPase interacting 1	0.2	2.2e-12	1.81e-10	4.7e-10
Igfbp3	insulin-like growth factor binding protein 3	4.71	2.11e-12	1.77e-10	4.58e-10
Gfra1	glial cell line derived neurotrophic factor family receptor alpha 1	0.36	1.93e-12	1.63e-10	4.24e-10
Clec1a	C-type lectin domain family 1, member a	4.83	1.81e-12	1.56e-10	4.06e-10
Nefl	neurofilament, light polypeptide	0.2	1.39e-12	1.22e-10	3.16e-10
Scrt2	scratch homolog 2, zinc finger protein (Drosophila)	0.26	1.37e-12	1.22e-10	3.16e-10
Nes	nestin	5.66	1.35e-12	1.22e-10	3.16e-10
Cep55	centrosomal protein 55	5.22	1.09e-12	1.01e-10	2.61e-10
Syn1	synapsin I	0.28	1.08e-12	1.01e-10	2.61e-10
Syt13	synaptotagmin XIII	0.23	9.02e-13	8.61e-11	2.24e-10
Zfp385c	zinc finger protein 385C	0.29	8.82e-13	8.57e-11	2.22e-10
C1ql2	complement component 1, q subcomponent-like 2	0.23	7.53e-13	7.46e-11	1.94e-10
Fam84a	family with sequence similarity 84, member A	0.21	5.58e-13	5.63e-11	1.46e-10
Ptpn5	protein tyrosine phosphatase, non-receptor type 5	0.17	5.07e-13	5.21e-11	1.35e-10
Anxa3	annexin A3	3.64	3.71e-13	3.88e-11	1.01e-10
Itga1	integrin alpha 1	6.77	3.49e-13	3.73e-11	9.69e-11
Tm4sf1	transmembrane 4 superfamily member 1	5.5	3.42e-13	3.73e-11	9.69e-11
Dio2	deiodinase, iodothyronine, type II	3.64	1.67e-13	1.86e-11	4.82e-11
Ccr2	chemokine (C-C motif) receptor 2	27.7	1.55e-13	1.77e-11	4.58e-11
Kcnip1	Kv channel-interacting protein 1	0.22	9.43e-14	1.1e-11	2.85e-11
Gad1	glutamate decarboxylase 1	0.27	9.1e-14	1.08e-11	2.81e-11
Ube2ql1	ubiquitin-conjugating enzyme E2Q family-like 1	0.33	8.14e-14	9.89e-12	2.57e-11
Rprm	reprimo, TP53 dependent G2 arrest mediator candidate	0.27	6.54e-14	8.13e-12	2.11e-11
Ina	internexin neuronal intermediate filament protein, alpha	0.36	5.51e-14	7.01e-12	1.82e-11
Islr2	immunoglobulin superfamily containing leucine-rich repeat 2	0.19	4.17e-14	5.44e-12	1.41e-11
Nsg1	neuron specific gene family member 1	0.19	3.4e-14	4.54e-12	1.18e-11
6330403K07Rik	RIKEN cDNA 6330403K07 gene	0.38	2.62e-14	3.59e-12	9.33e-12
Dmp1	dentin matrix protein 1	72.36	2.04e-14	2.87e-12	7.45e-12
Fgf2	fibroblast growth factor 2	23.56	1.52e-14	2.2e-12	5.71e-12
Ret	ret proto-oncogene	0.27	1.27e-14	1.89e-12	4.9e-12
Sez6l	seizure related 6 homolog like	0.26	1.14e-14	1.73e-12	4.5e-12
Apold1	apolipoprotein L domain containing 1	7.97	1.12e-14	1.73e-12	4.5e-12
Lppr5	RIKEN cDNA 4833424O15 gene	0.34	9.04e-15	1.47e-12	3.8e-12
Thy1	thymus cell antigen 1, theta	0.13	8.42e-15	1.41e-12	3.65e-12
Tmem130	transmembrane protein 130	0.28	6.84e-15	1.18e-12	3.06e-12
Ndufa4l2	NADH dehydrogenase (ubiquinone) 1 alpha subcomplex, 4-like 2	0.12	6.3e-15	1.12e-12	2.92e-12
Gimap6	GTPase, IMAP family member 6	4.13	3.8e-15	7.01e-13	1.82e-12
Mllt11	myeloid/lymphoid or mixed-lineage leukemia (trithorax homolog, Drosophila); translocated to, 11	0.4	2.45e-15	4.68e-13	1.22e-12
Nrsn2	neurensin 2	0.16	1.58e-15	3.13e-13	8.12e-13
Rtn1	reticulon 1	0.4	7.12e-16	1.46e-13	3.8e-13
Stk32b	serine/threonine kinase 32B	0.22	4.82e-16	1.03e-13	2.68e-13
Edn1	endothelin 1	7.4	3.96e-16	8.83e-14	2.29e-13
[truncated: 23 more rows]

## Sheet: VEGF-Trap_vs_hFc
gene	description	fold.change	uncorrected_P.value	q.value	BH.corrected.P.value
Gipr	gastric inhibitory polypeptide receptor	7.42	0.000344	0.0987	0.134
Cnnm1	cyclin M1	1.99	0.000318	0.0938	0.127
Muc2	mucin 2	6.76	0.00891	0.457	0.619
Pdzrn3	PDZ domain containing RING finger 3	2	0.000276	0.0867	0.118
Mfsd2a	major facilitator superfamily domain containing 2A	0.41	0.000285	0.0867	0.118
Ubald2	UBA-like domain containing 2	0.32	0.000259	0.0841	0.114
Ntsr1	neurotensin receptor 1	3.59	0.00372	0.457	0.619
Frem2	Fras1 related extracellular matrix protein 2	2.14	0.000245	0.082	0.111
Gys1	glycogen synthase 1, muscle	1.81	0.000204	0.0705	0.0956
Sez6l	seizure related 6 homolog like	1.71	0.000193	0.0693	0.0941
Itgam	integrin alpha M	1.88	9.03e-05	0.0336	0.0456
Col2a1	collagen, type II, alpha 1	2.84	8.4e-05	0.0324	0.044
Plcxd1	phosphatidylinositol-specific phospholipase C, X domain containing 1	2.27	5.81e-05	0.0233	0.0317
P4ha1	procollagen-proline, 2-oxoglutarate 4-dioxygenase (proline 4-hydroxylase), alpha 1 polypeptide	1.94	5.4e-05	0.0226	0.0307
Xlr3a	X-linked lymphocyte-regulated 3A	0.23	5.1e-05	0.0223	0.0302
Pcdha7-g	-	2.84	0.00221	0.363	0.493
Ranbp3l	RAN binding protein 3-like	2.83	0.00777	0.457	0.619
Prss35	protease, serine 35	2.8	4.34e-05	0.0198	0.0269
Cdh23	cadherin 23 (otocadherin)	2.77	0.00213	0.362	0.491
Fn1	fibronectin 1	2.62	0.000569	0.143	0.194
Pfkp	phosphofructokinase, platelet	2.5	0.00179	0.339	0.459
P4ha2	procollagen-proline, 2-oxoglutarate 4-dioxygenase (proline 4-hydroxylase), alpha II polypeptide	2.29	1.87e-05	0.00922	0.0125
Itih5	inter-alpha (globulin) inhibitor H5	2.28	1.93e-05	0.00922	0.0125
Igfbp5	insulin-like growth factor binding protein 5	2.42	0.000546	0.143	0.194
Pdk1	pyruvate dehydrogenase kinase, isoenzyme 1	2.38	1.28e-05	0.00676	0.00916
H2-Ab1	histocompatibility 2, class II antigen A, beta 1	2.37	0.00669	0.457	0.619
Onecut1	one cut domain, family member 1	2.3	0.000373	0.104	0.141
Pfkfb3	6-phosphofructo-2-kinase/fructose-2,6-biphosphatase 3	3.04	4.45e-06	0.00248	0.00337
Apln	apelin	3.3	3.96e-06	0.00234	0.00318
Smtnl2	smoothelin-like 2	3.18	1.49e-06	0.000936	0.00127
Gbp3	guanylate binding protein 3	2.24	0.00209	0.362	0.491
Ptpn14	protein tyrosine phosphatase, non-receptor type 14	2.43	5.37e-07	0.000359	0.000487
Fam163b	family with sequence similarity 163, member B	2.21	0.00343	0.457	0.619
Lhx1	LIM homeobox protein 1	2.18	0.00639	0.457	0.619
Sorl1	sortilin-related receptor, LDLR class A repeats-containing	2.18	0.00698	0.457	0.619
Hcn4	hyperpolarization-activated, cyclic nucleotide-gated K+ 4	2.18	0.00255	0.389	0.527
Fgf11	fibroblast growth factor 11	2.15	0.000794	0.185	0.252
Mthfd1l	methylenetetrahydrofolate dehydrogenase (NADP+ dependent) 1-like	2.13	2.39e-07	0.000171	0.000233
Crym	crystallin, mu	0.58	2.12e-07	0.000164	0.000222
Fhad1	forkhead-associated (FHA) phosphopeptide binding domain 1	2.13	0.00136	0.291	0.395
Loxl2	lysyl oxidase-like 2	2.11	0.000556	0.143	0.194
Oasl2	2'-5' oligoadenylate synthetase-like 2	2.1	0.00146	0.3	0.406
Bnip3	BCL2/adenovirus E1B interacting protein 3	2.47	1.49e-07	0.00013	0.000176
Egln3	EGL nine homolog 3 (C. elegans)	2.06	0.00294	0.44	0.597
Stc1	stanniocalcin 1	2.06	0.00101	0.231	0.314
Kbtbd11	kelch repeat and BTB (POZ) domain containing 11	2.03	0.00817	0.457	0.619
Gpr12	G-protein coupled receptor 12	2	0.00654	0.457	0.619
Triobp	TRIO and F-actin binding protein	2.22	1.55e-07	0.00013	0.000176
Sdk2	sidekick homolog 2 (chicken)	1.99	0.0042	0.457	0.619
Kcne1	potassium voltage-gated channel, Isk-related subfamily, member 1	9.33	7.54e-08	7.58e-05	0.000103
Cntnap1	contactin associated protein-like 1	1.98	0.00632	0.457	0.619
Ssc5d	scavenger receptor cysteine rich domain containing (5 domains)	1.96	0.00904	0.457	0.619
Slc16a3	solute carrier family 16 (monocarboxylic acid transporters), member 3	2.9	3.4e-08	3.8e-05	5.15e-05
Stc2	stanniocalcin 2	4.69	9.64e-09	1.21e-05	1.64e-05
Fosl2	fos-like antigen 2	1.92	0.00862	0.457	0.619
3632451O06Rik	RIKEN cDNA 3632451O06 gene	1.91	0.0073	0.457	0.619
Egln1	EGL nine homolog 1 (C. elegans)	1.95	2.39e-09	3.42e-06	4.64e-06
Rcor2	REST corepressor 2	1.87	0.00594	0.457	0.619
Sv2c	synaptic vesicle glycoprotein 2c	1.86	0.00625	0.457	0.619
Rnf217	ring finger protein 217	1.84	0.000705	0.169	0.229
Fbln2	fibulin 2	1.84	0.00237	0.367	0.497
Slc2a3	solute carrier family 2 (facilitated glucose transporter), member 3	2.1	8.39e-10	1.4e-06	1.91e-06
Rnf165	ring finger protein 165	1.77	0.00193	0.359	0.487
Tnfsf9	tumor necrosis factor (ligand) superfamily, member 9	1.75	0.00435	0.457	0.619
Epas1	endothelial PAS domain protein 1	1.75	0.00606	0.457	0.619
Gabbr2	gamma-aminobutyric acid (GABA) B receptor, 2	1.75	0.00136	0.291	0.395
Cdh6	cadherin 6	1.74	0.00442	0.457	0.619
Cacna1i	calcium channel, voltage-dependent, alpha 1I subunit	1.72	0.00957	0.457	0.619
Mdga1	MAM domain containing glycosylphosphatidylinositol anchor 1	1.72	0.00998	0.457	0.619
Adm	adrenomedullin	5.82	4.42e-10	8.88e-07	1.2e-06
Pcdhgb4	protocadherin gamma subfamily B, 4	1.7	0.0095	0.457	0.619
Pde4a	phosphodiesterase 4A, cAMP specific	1.7	0.00228	0.367	0.497
Atp2b3	ATPase, Ca++ transporting, plasma membrane 3	1.7	0.00974	0.457	0.619
Fam162a	family with sequence similarity 162, member A	1.69	0.00171	0.336	0.456
Sox9	SRY (sex determining region Y)-box 9	1.67	0.0093	0.457	0.619
Slc45a1	solute carrier family 45, member 1	1.67	0.0065	0.457	0.619
Ace	angiotensin I converting enzyme (peptidyl-dipeptidase A) 1	1.66	0.00408	0.457	0.619
Uaca	uveal autoantigen with coiled-coil domains and ankyrin repeats	1.66	0.00541	0.457	0.619
Samd4	sterile alpha motif domain containing 4	1.63	0.00814	0.457	0.619
Gm13889	predicted gene 13889	1.62	0.00178	0.339	0.459
Clstn2	calsyntenin 2	1.61	0.00728	0.457	0.619
Pcdhgb1	protocadherin gamma subfamily B, 1	1.6	0.00335	0.457	0.619
Grin1	glutamate receptor, ionotropic, NMDA1 (zeta 1)	1.6	0.00979	0.457	0.619
Colgalt2	collagen beta(1-O)galactosyltransferase 2	1.59	0.00167	0.335	0.454
Kcnh1	potassium voltage-gated channel, subfamily H (eag-related), member 1	1.59	0.00541	0.457	0.619
Mapt	microtubule-associated protein tau	1.58	0.00333	0.457	0.619
Grin3a	glutamate receptor ionotropic, NMDA3A	1.58	0.00325	0.457	0.619
Dpp6	dipeptidylpeptidase 6	1.58	0.00942	0.457	0.619
Iffo2	intermediate filament family orphan 2	1.57	0.00373	0.457	0.619
Dagla	diacylglycerol lipase, alpha	1.56	0.00146	0.3	0.406
Reln	reelin	1.53	0.00807	0.457	0.619
A330074K22Rik	RIKEN cDNA A330074K22 gene	1.52	0.00464	0.457	0.619
S1pr3	sphingosine-1-phosphate receptor 3	1.5	0.00722	0.457	0.619
Txnip	thioredoxin interacting protein	0.66	0.000496	0.135	0.183
Thyn1	thymocyte nuclear protein 1	0.66	0.00474	0.457	0.619
Racgap1	Rac GTPase-activating protein 1	0.65	0.002	0.362	0.491
Dio2	deiodinase, iodothyronine, type II	0.64	0.00503	0.457	0.619
Nme7	NME/NM23 family member 7	0.63	0.00434	0.457	0.619
Msmo1	sterol-C4-methyl oxidase-like	0.63	0.00871	0.457	0.619
Fopnl	Fgfr1op N-terminal like	0.62	0.00416	0.457	0.619
Pax7	paired box 7	0.62	0.00743	0.457	0.619
Slc52a2	solute carrier protein 52, member 2	0.61	0.00773	0.457	0.619
Gtf2h5	general transcription factor IIH, polypeptide 5	0.61	0.00791	0.457	0.619
Gemin2	gem (nuclear organelle) associated protein 2	0.6	0.0038	0.457	0.619
Mettl2	methyltransferase like 2	0.58	0.00863	0.457	0.619
Ciart	circadian associated repressor of transcription	2.88	6.64e-11	1.67e-07	2.26e-07
A930015D03Rik	RIKEN cDNA A930015D03 gene	0.57	0.00817	0.457	0.619
Sat1	spermidine/spermine N1-acetyl transferase 1	0.57	0.00796	0.457	0.619
Lmo2	LIM domain only 2	0.55	0.00314	0.457	0.619
Slc39a8	solute carrier family 39 (metal ion transporter), member 8	0.55	0.0022	0.363	0.493
Polr2h	polymerase (RNA) II (DNA directed) polypeptide H	0.54	0.0049	0.457	0.619
Ttc27	tetratricopeptide repeat domain 27	0.54	0.0087	0.457	0.619
Tmem17	transmembrane protein 17	0.53	0.00235	0.367	0.497
Tdrp	testis development related protein	0.51	0.00884	0.457	0.619
Pole2	polymerase (DNA directed), epsilon 2 (p59 subunit)	0.46	0.00857	0.457	0.619
Nostrin	nitric oxide synthase trafficker	0.45	0.00202	0.362	0.491
Ndufb3	NADH dehydrogenase (ubiquinone) 1 beta subcomplex 3	0.43	0.00738	0.457	0.619
Slc24a5	solute carrier family 24, member 5	0.43	0.00394	0.457	0.619
Gm6654	predicted pseudogene 6654	0.43	0.0098	0.457	0.619
Gm10012	cytochrome c oxidase, subunit VIIc pseudogene	0.42	0.00504	0.457	0.619
Cox7c	cytochrome c oxidase subunit VIIc	0.41	0.00805	0.457	0.619
Hk2	hexokinase 2	2.95	7.9e-12	2.65e-08	3.59e-08
Gm11544	predicted gene 11544	0.4	0.00442	0.457	0.619
Mettl23	methyltransferase like 23	0.4	0.00936	0.457	0.619
Pcdh12	protocadherin 12	0.4	0.000699	0.169	0.229
Fdx1l	ferredoxin 1-like	0.4	0.00373	0.457	0.619
Tmem256	transmembrane protein 256	0.39	0.00387	0.457	0.619
Tmem223	transmembrane protein 223	0.39	0.00611	0.457	0.619
Sla2	Src-like-adaptor 2	0.39	0.0049	0.457	0.619
Myeov2	myeloma overexpressed 2	0.37	0.00909	0.457	0.619
Znhit3	zinc finger, HIT type 3	0.37	0.00607	0.457	0.619
Rps21	ribosomal protein S21	0.37	0.006	0.457	0.619
Nudt1	nudix (nucleoside diphosphate linked moiety X)-type motif 1	0.37	0.00846	0.457	0.619
TrnL1	tRNA leucine 1, mitochondrial	0.37	0.00479	0.457	0.619
Sep15	selenoprotein	0.36	0.00839	0.457	0.619
Ndufc2	NADH dehydrogenase (ubiquinone) 1, subcomplex unknown, 2	0.36	0.00888	0.457	0.619
Cebpd	CCAAT/enhancer binding protein (C/EBP), delta	0.34	0.00867	0.457	0.619
Rpl15	ribosomal protein L15	0.33	0.0065	0.457	0.619
Mpv17l2	MPV17 mitochondrial membrane protein-like 2	0.33	0.00882	0.457	0.619
Ak4	adenylate kinase 4	2.95	2e-15	1e-11	1.36e-11
Rps15a	ribosomal protein S15A	0.32	0.00237	0.367	0.497
Ict1	immature colon carcinoma transcript 1	0.31	0.00949	0.457	0.619
AU021092	expressed sequence AU021092	0.31	0.00485	0.457	0.619
A930003A15Rik	RIKEN cDNA A930003A15 gene	0.31	0.00701	0.457	0.619
Pycrl	pyrroline-5-carboxylate reductase-like	0.3	0.00718	0.457	0.619
Psma7	proteasome (prosome, macropain) subunit, alpha type 7	0.3	0.00858	0.457	0.619
Timm22	translocase of inner mitochondrial membrane 22	0.29	0.00559	0.457	0.619
Mrpl23	mitochondrial ribosomal protein L23	0.29	0.0085	0.457	0.619
Psmb3	proteasome (prosome, macropain) subunit, beta type 3	0.28	0.00699	0.457	0.619
Immp1l	IMP1 inner mitochondrial membrane peptidase-like (S. cerevisiae)	0.28	0.00425	0.457	0.619
Mrpl20	mitochondrial ribosomal protein L20	0.28	0.0076	0.457	0.619
Gpx4	glutathione peroxidase 4	0.27	0.00516	0.457	0.619
Sdhb	succinate dehydrogenase complex, subunit B, iron sulfur (Ip)	0.27	0.00856	0.457	0.619
Nudt14	nudix (nucleoside diphosphate linked moiety X)-type motif 14	0.26	0.00548	0.457	0.619
Ndufb8	NADH dehydrogenase (ubiquinone) 1 beta subcomplex 8	0.26	0.00999	0.457	0.619
Ndufb4	NADH dehydrogenase (ubiquinone) 1 beta subcomplex 4	0.25	0.0066	0.457	0.619
Rps10	ribosomal protein S10	0.25	0.00592	0.457	0.619
Rps3	ribosomal protein S3	0.25	0.00892	0.457	0.619
Dctpp1	dCTP pyrophosphatase 1	0.23	0.00718	0.457	0.619
Ndufa4l2	NADH dehydrogenase (ubiquinone) 1 alpha subcomplex, 4-like 2	4.38	1.38e-21	1.39e-17	1.88e-17
Atp6v0e	ATPase, H+ transporting, lysosomal V0 subunit E	0.22	0.00596	0.457	0.619
Slc16a8	solute carrier family 16 (monocarboxylic acid transporters), member 8	0.21	0.00615	0.457	0.619
Tspan10	tetraspanin 10	0.18	0.00497	0.457	0.619
Pmel	premelanosome protein	0.15	0.00315	0.457	0.619
