# Supplementary material for: The potassium channel Kcne3 is a VEGFA-inducible gene selectively expressed by vascular endothelial tip cells
Source: Angiogenesis. 2019 Nov 21;23(2):179–92. doi: 10.1007/s10456-019-09696-8 (PMC7160073; doi:10.1007/s10456-019-09696-8)
Supplement: Supplementary file 5 — Electronic supplementary material 3 (XLS 284 kb) [file 10456_2019_9696_MOESM5_ESM.xls]

## Sheet: 6hr__VGT_vs_hFc
gene	description	fold.change	uncorrected_P.value	q.value	BH.corrected.P.value
Ppp1r42	protein phosphatase 1, regulatory subunit 42	0.58	0.0003	0.0543	0.0833
Arid5a	AT rich interactive domain 5A (MRF1-like)	1.84	0.00405	0.129	0.198
Gulp1	GULP, engulfment adaptor PTB domain containing 1	0.64	0.000206	0.0472	0.0725
Stk17b	serine/threonine kinase 17b (apoptosis-inducing)	0.65	0.000818	0.0777	0.119
Sgol2a	shugoshin-like 2 (S. pombe)	0.54	0.000907	0.0793	0.122
Ecel1	endothelin converting enzyme-like 1	3.63	0.00148	0.0893	0.137
Gin1	gypsy retrotransposon integrase 1	0.58	0.000461	0.06	0.0922
Slc41a1	solute carrier family 41, member 1	1.58	0.000834	0.0784	0.12
Lrrn2	leucine rich repeat protein 2, neuronal	1.77	0.000705	0.0732	0.112
Pdc	phosducin	0.64	0.00826	0.152	0.233
Rgs8	regulator of G-protein signaling 8	1.64	0.00975	0.156	0.239
Fam163a	family with sequence similarity 163, member A	1.81	0.00618	0.145	0.223
Ifi204	interferon activated gene 204	0.31	0.00207	0.0993	0.152
Cox20	COX20 Cox2 chaperone	0.6	0.00139	0.0881	0.135
Dtl	denticleless homolog (Drosophila)	0.47	0.0073	0.148	0.227
Ust	uronyl-2-sulfotransferase	1.64	4.58e-05	0.0256	0.0392
9030612E09Rik	RIKEN cDNA 9030612E09 gene	0.24	2.41e-06	0.00381	0.00585
C130030K03Rik	proteasome (prosome, macropain) subunit, alpha type 6 pseudogene	0.44	0.00412	0.13	0.199
Asf1a	ASF1 anti-silencing function 1 homolog A (S. cerevisiae)	0.65	0.00201	0.0982	0.151
Hk1	hexokinase 1	1.61	0.00467	0.134	0.205
Egr2	early growth response 2	3.38	0.00041	0.06	0.0922
Pdxk	pyridoxal (pyridoxine, vitamin B6) kinase	1.53	0.0036	0.125	0.191
Gng7	guanine nucleotide binding protein (G protein), gamma 7	1.78	0.00286	0.117	0.179
Slc39a3	solute carrier family 39 (zinc transporter), member 3	1.59	0.00768	0.149	0.229
Pip5k1c	phosphatidylinositol-4-phosphate 5-kinase, type 1 gamma	1.64	0.00116	0.0862	0.132
Gm10778	predicted gene 10778	0.64	0.00345	0.125	0.191
Zfp433	RIKEN cDNA 1700123A16 gene	0.65	0.000174	0.0432	0.0664
Zfp873	zinc finger protein 873	0.64	0.000116	0.0358	0.0549
Zfp938	zinc finger protein 938	0.57	1.67e-05	0.0125	0.0191
A230046K03Rik	RIKEN cDNA A230046K03 gene	0.65	1.21e-05	0.00982	0.0151
1810014B01Rik	RIKEN cDNA 1810014B01 gene	0.65	0.00134	0.0881	0.135
Cep83	coiled-coil domain containing 41	0.59	0.00129	0.0881	0.135
B4galnt1	beta-1,4-N-acetyl-galactosaminyl transferase 1	1.53	0.00363	0.125	0.191
Nab2	Ngfi-A binding protein 2	1.7	0.000651	0.0708	0.109
Inpp5j	inositol polyphosphate 5-phosphatase J	1.69	0.006	0.144	0.221
Kremen1	kringle containing transmembrane protein 1	1.84	0.00174	0.0957	0.147
Nacad	NAC alpha domain containing	1.52	0.000562	0.066	0.101
Slc1a4	solute carrier family 1 (glutamate/neutral amino acid transporter), member 4	1.55	0.00162	0.0933	0.143
Fancl	Fanconi anemia, complementation group L	0.57	0.00347	0.125	0.191
Sh3pxd2b	SH3 and PX domains 2B	1.8	0.000193	0.0452	0.0694
Npm1	nucleophosmin 1	0.6	0.00987	0.156	0.24
Ssh2	slingshot homolog 2 (Drosophila)	0.62	0.00125	0.0866	0.133
Ankrd13b	ankyrin repeat domain 13b	1.67	0.000396	0.06	0.0922
Tmem132e	transmembrane protein 132E	1.72	0.00535	0.136	0.208
Slfn2	schlafen 2	0.44	0.00957	0.156	0.239
Samd14	sterile alpha motif domain containing 14	1.56	0.000366	0.06	0.0922
Ngfr	nerve growth factor receptor (TNFR superfamily, member 16)	1.83	0.00807	0.151	0.231
Mpp2	membrane protein, palmitoylated 2 (MAGUK p55 subfamily member 2)	1.68	0.000417	0.06	0.0922
Slc16a3	solute carrier family 16 (monocarboxylic acid transporters), member 3	1.6	0.00156	0.092	0.141
Sf3b6	RIKEN cDNA 0610009D07 gene	0.46	0.00596	0.144	0.221
Kcnf1	potassium voltage-gated channel, subfamily F, member 1	1.68	0.00968	0.156	0.239
Rrm2	ribonucleotide reductase M2	0.35	0.000747	0.0756	0.116
Id2	inhibitor of DNA binding 2	0.37	0.00793	0.15	0.231
Bcap29	B cell receptor associated protein 29	0.53	0.0066	0.147	0.226
Mbip	MAP3K12 binding inhibitory protein 1	0.62	7.18e-05	0.0261	0.0401
Rpl36al	ribosomal protein L36A-like	0.37	0.00768	0.149	0.229
Eif2s1	eukaryotic translation initiation factor 2, subunit 1 alpha	0.45	0.00645	0.147	0.226
Gm20337	predicted gene, 20337	0.53	0.00897	0.156	0.239
Zdhhc22	zinc finger, DHHC-type containing 22	2.1	0.00172	0.0957	0.147
Ppp1r13b	protein phosphatase 1, regulatory (inhibitor) subunit 13B	1.55	0.00998	0.156	0.24
Cep170b	centrosomal protein 170B	1.71	0.00228	0.104	0.159
Pfkp	phosphofructokinase, platelet	1.53	0.00961	0.156	0.239
Mrpl32	mitochondrial ribosomal protein L32	0.49	0.009	0.156	0.239
Cks2	CDC28 protein kinase regulatory subunit 2	0.44	0.00352	0.125	0.191
Gprin1	G protein-regulated inducer of neurite outgrowth 1	1.67	0.00852	0.153	0.235
Gm3604	predicted gene 3604	0.55	0.00029	0.0543	0.0833
Zfp934	zinc finger protein 934	0.52	0.000334	0.0562	0.0862
6720489N17Rik	RIKEN cDNA 6720489N17 gene	0.57	0.00166	0.0942	0.145
Gm5141	predicted gene 5141	0.55	6.66e-08	0.000595	0.000913
Gm10767	predicted gene 10767	0.58	0.00911	0.156	0.239
Zfp759	zinc finger protein 759	0.53	2.56e-06	0.00381	0.00585
Zfp874b	zinc finger protein 874b	0.65	0.000973	0.0827	0.127
9430065F17Rik	RIKEN cDNA 9430065F17 gene	0.55	0.00299	0.118	0.181
Zfp273	zinc finger protein 273	0.63	0.00288	0.117	0.179
Zfp825	zinc finger protein 825	0.63	0.00145	0.0881	0.135
Cetn3	centrin 3	0.54	0.00599	0.144	0.221
Atg10	autophagy related 10	0.57	0.00718	0.148	0.227
Serf1	small EDRK-rich factor 1	0.38	0.0088	0.154	0.237
Esm1	endothelial cell-specific molecule 1	0.29	6.35e-05	0.0261	0.0401
Thoc7	THO complex 7 homolog (Drosophila)	0.52	0.0065	0.147	0.226
Gnpnat1	glucosamine-phosphate N-acetyltransferase 1	0.66	0.00536	0.136	0.208
Pnp	purine-nucleoside phosphorylase	0.62	0.00936	0.156	0.239
Dleu2	deleted in lymphocytic leukemia, 2	0.65	0.0009	0.0793	0.122
Extl3	exostoses (multiple)-like 3	1.6	0.00125	0.0866	0.133
Esd	esterase D/formylglutathione hydrolase	0.51	0.00873	0.154	0.237
Cldn10	claudin 10	0.47	0.00102	0.0842	0.129
Emc2	ER membrane protein complex subunit 2	0.55	0.00489	0.134	0.205
Tatdn1	TatD DNase domain containing 1	0.62	0.00936	0.156	0.239
Sh3bp1	SH3-domain binding protein 1	1.97	0.0071	0.148	0.227
Npcd	neuronal pentraxin chromo domain	2.1	0.00324	0.123	0.189
Csdc2	cold shock domain containing C2, RNA binding	1.59	0.00752	0.149	0.229
Srebf2	sterol regulatory element binding factor 2	1.5	0.00305	0.119	0.183
Col2a1	collagen, type II, alpha 1	1.82	0.00865	0.154	0.236
Morf4l1-ps1	RIKEN cDNA A730098P11 gene	0.52	0.00175	0.0957	0.147
Slc15a2	solute carrier family 15 (H+/peptide transporter), member 2	0.55	5.68e-05	0.0261	0.0401
Agpat4	1-acylglycerol-3-phosphate O-acyltransferase 4 (lysophosphatidic acid acyltransferase, delta)	1.62	0.00295	0.117	0.18
Gm3435	predicted gene 3435	0.57	0.00236	0.106	0.162
Zfp960	zinc finger protein 960	0.63	0.000229	0.0512	0.0786
Zfp97	zinc finger protein 97	0.63	1.18e-05	0.00982	0.0151
Zfp51	zinc finger protein 51	0.53	0.00105	0.0843	0.129
Zfp52	zinc finger protein 52	0.59	5.15e-05	0.0261	0.0401
Zfp948	zinc finger protein 948	0.6	0.00727	0.148	0.227
Zfp942	zinc finger protein 942	0.66	0.00188	0.0971	0.149
Zfp943	zinc finger prtoein 943	0.56	0.000645	0.0708	0.109
Zfp758	zinc finger protein 758	0.53	7.23e-07	0.00215	0.0033
Zfp945	zinc finger protein 945	0.66	0.000802	0.0777	0.119
Syngr3	synaptogyrin 3	1.78	0.000299	0.0543	0.0833
Srsf3	serine/arginine-rich splicing factor 3	0.63	0.00461	0.134	0.205
Wiz	widely-interspaced zinc finger motifs	1.68	0.00367	0.125	0.192
Zfp472	zinc finger protein 472	0.57	0.00114	0.0862	0.132
Zfp955a	zinc finger protein 955A	0.66	0.00287	0.117	0.179
Tap2	transporter 2, ATP-binding cassette, sub-family B (MDR/TAP)	1.52	0.00208	0.0993	0.152
H2-Q2	histocompatibility 2, Q region locus 2	2.97	0.000279	0.0543	0.0833
Ddr1	discoidin domain receptor family, member 1	1.55	0.00398	0.129	0.198
C920025E04Rik	RIKEN cDNA C920025E04 gene	2.75	0.00701	0.148	0.227
Cenpq	centromere protein Q	0.55	0.00905	0.156	0.239
Supt3	suppressor of Ty 3	0.51	0.00564	0.139	0.213
Xpo5	exportin 5	1.55	0.0015	0.09	0.138
2310039H08Rik	RIKEN cDNA 2310039H08 gene	0.42	0.00445	0.134	0.205
Kdm4b	lysine (K)-specific demethylase 4B	1.53	0.00452	0.134	0.205
Tubb4a	tubulin, beta 4A class IVA	1.5	0.00184	0.0971	0.149
Gm6548	eukaryotic translation elongation factor 1 alpha 1 pseudogene	0.52	0.00534	0.136	0.208
Atl2	atlastin GTPase 2	0.64	9.65e-05	0.0319	0.049
Gemin6	gem (nuclear organelle) associated protein 6	0.55	0.00655	0.147	0.226
1110020A21Rik	RIKEN cDNA 1110020A21 gene	0.48	0.00103	0.0843	0.129
Gm20939	predicted gene, 20939	0.66	0.00982	0.156	0.239
Crem	cAMP responsive element modulator	0.65	0.00139	0.0881	0.135
Thoc1	THO complex 1	0.63	0.000811	0.0777	0.119
Spry4	sprouty homolog 4 (Drosophila)	1.86	0.00041	0.06	0.0922
Tnfaip8	tumor necrosis factor, alpha-induced protein 8	0.44	0.00504	0.134	0.205
Pcx	pyruvate carboxylase	1.57	0.000171	0.0432	0.0664
Pacs1	phosphofurin acidic cluster sorting protein 1	1.77	0.00473	0.134	0.205
Ms4a4a	membrane-spanning 4-domains, subfamily A, member 4A	0.3	0.00153	0.0911	0.14
2410127L17Rik	RIKEN cDNA 2410127L17 gene	0.59	0.00877	0.154	0.237
Acta2	actin, alpha 2, smooth muscle, aorta	0.29	0.00529	0.135	0.208
Bbip1	BBSome interacting protein 1	0.56	0.000304	0.0543	0.0833
Fam204a	DNA segment, Chr 19, ERATO Doi 737, expressed	0.64	0.00261	0.113	0.173
Meig1	meiosis expressed gene 1	0.43	0.00791	0.15	0.231
Trdmt1	tRNA aspartic acid methyltransferase 1	0.54	0.0016	0.0929	0.143
Ncs1	neuronal calcium sensor 1	1.73	0.00574	0.141	0.216
Dab2ip	disabled 2 interacting protein	1.6	0.000458	0.06	0.0922
Arhgap15	Rho GTPase activating protein 15	0.58	0.00327	0.123	0.19
Nmi	N-myc (and STAT) interactor	0.52	0.00379	0.126	0.194
Ccdc173	coiled-coil domain containing 173	0.59	0.000881	0.0793	0.122
Mettl5	methyltransferase like 5	0.6	0.00496	0.134	0.205
Ccdc34	coiled-coil domain containing 34	0.61	0.000402	0.06	0.0922
Lpcat4	lysophosphatidylcholine acyltransferase 4	1.55	0.000922	0.0799	0.123
Bahd1	bromo adjacent homology domain containing 1	1.53	0.00715	0.148	0.227
Sppl2a	signal peptide peptidase like 2A	0.51	0.00723	0.148	0.227
Ckap2l	cytoskeleton associated protein 2-like	0.51	0.0083	0.152	0.233
Kiz	kizuna centrosomal protein	0.66	0.00713	0.148	0.227
Zfp120	zinc finger protein 120	0.62	0.000131	0.0376	0.0578
Sdcbp2	syndecan binding protein (syntenin) 2	0.48	0.00429	0.13	0.2
Eif2s2	eukaryotic translation initiation factor 2, subunit 2 (beta)	0.47	0.00905	0.156	0.239
Mmp24	matrix metallopeptidase 24	1.65	0.00189	0.0971	0.149
Fam83d	family with sequence similarity 83, member D	0.45	0.00767	0.149	0.229
9430021M05Rik	RIKEN cDNA 9430021M05 gene	1.67	0.00797	0.15	0.231
B4galt5	UDP-Gal:betaGlcNAc beta 1,4-galactosyltransferase, polypeptide 5	1.82	0.000771	0.0756	0.116
Gm14391	predicted gene 14391	0.38	0.000481	0.06	0.0922
Gm14440	predicted gene 14440	0.46	0.00135	0.0881	0.135
Gm14296	predicted gene 14296	0.64	0.00982	0.156	0.239
Gm14322	predicted gene 14322	0.49	0.00142	0.0881	0.135
Gm14326	predicted gene 14326	0.57	0.00352	0.125	0.191
Etohi1	ethanol induced 1	0.6	0.000283	0.0543	0.0833
Zfp931	zinc finger protein 931	0.54	0.00141	0.0881	0.135
Fabp4	fatty acid binding protein 4, adipocyte	0.52	0.00685	0.148	0.227
Fxr1	fragile X mental retardation gene 1, autosomal homolog	0.49	0.0045	0.134	0.205
Dnajc19	DnaJ (Hsp40) homolog, subfamily C, member 19	0.61	0.00746	0.149	0.228
Pabpc4l	poly(A) binding protein, cytoplasmic 4-like	0.19	4.51e-07	0.00201	0.00309
Pdcd10	programmed cell death 10	0.58	0.00432	0.131	0.2
Fam198b	family with sequence similarity 198, member B	0.48	0.000973	0.0827	0.127
Mrpl24	mitochondrial ribosomal protein L24	0.54	0.00463	0.134	0.205
Chrnb2	cholinergic receptor, nicotinic, beta polypeptide 2 (neuronal)	1.89	0.00471	0.134	0.205
Sv2a	synaptic vesicle glycoprotein 2 a	1.82	0.007	0.148	0.227
Dnttip2	deoxynucleotidyltransferase, terminal, interacting protein 2	0.66	0.00662	0.147	0.226
Fsbp	fibrinogen silencer binding protein	0.64	0.000491	0.06	0.0922
Triqk	triple QxxK/R motif containing	0.61	0.00964	0.156	0.239
Xpa	xeroderma pigmentosum, complementation group A	0.54	0.00132	0.0881	0.135
Ptpn3	protein tyrosine phosphatase, non-receptor type 3	0.53	0.00917	0.156	0.239
Caap1	caspase activity and apoptosis inhibitor 1	0.59	1.86e-05	0.0127	0.0196
Gm12657	predicted gene 12657	0.33	0.000403	0.06	0.0922
Ift74	intraflagellar transport 74	0.62	0.00116	0.0862	0.132
Itgb3bp	integrin beta 3 binding protein (beta3-endonexin)	0.55	0.00709	0.148	0.227
Efcab7	EF-hand calcium binding domain 7	0.59	0.00961	0.156	0.239
Ak4	adenylate kinase 4	1.71	3.29e-05	0.021	0.0322
Ttc39aos1	Derived by automated computational analysis using gene prediction method: Gnomon.	0.46	0.00309	0.12	0.184
Ncdn	neurochondrin	1.52	0.00616	0.145	0.223
Snhg3	small nucleolar RNA host gene 3	0.48	0.00296	0.117	0.18
Sesn2	sestrin 2	1.71	0.000314	0.0549	0.0843
Gm13152	predicted gene 13152	0.65	0.00814	0.151	0.231
Mfn2	mitofusin 2	1.54	0.000752	0.0756	0.116
Acap3	ArfGAP with coiled-coil, ankyrin repeat and PH domains 3	1.63	0.0039	0.127	0.195
Gm15421	ribosomal protein L22 like 1 pseudogene	0.56	0.00672	0.148	0.227
1700096K18Rik	RIKEN cDNA 1700096K18 gene	0.51	0.0006	0.0695	0.107
Rnf32	ring finger protein 32	0.66	0.00482	0.134	0.205
Dpysl5	dihydropyrimidinase-like 5	1.56	0.00559	0.139	0.213
Fosl2	fos-like antigen 2	2.01	0.00144	0.0881	0.135
Plb1	phospholipase B1	2.3	0.00754	0.149	0.229
Haus3	HAUS augmin-like complex, subunit 3	0.58	0.00186	0.0971	0.149
Stk32b	serine/threonine kinase 32B	1.88	0.00836	0.152	0.233
Tmem128	transmembrane protein 128	0.51	0.00125	0.0866	0.133
Anxa3	annexin A3	0.31	0.00111	0.0862	0.132
Plcxd1	phosphatidylinositol-specific phospholipase C, X domain containing 1	1.79	0.000896	0.0793	0.122
Ulk1	unc-51 like kinase 1	1.73	0.00514	0.134	0.205
Sgsm1	small G protein signaling modulator 1	1.66	0.00801	0.151	0.231
Wscd2	WSC domain containing 2	1.56	0.00358	0.125	0.191
Mir6240	microRNA mir-6240	0.26	0.000283	0.0543	0.0833
Rpl37rt	predicted gene 13826	0.47	0.00355	0.125	0.191
Rfc2	replication factor C (activator 1) 2	0.67	0.00201	0.0982	0.151
Tbl2	transducin (beta)-like 2	1.66	0.00109	0.0862	0.132
Sh2b2	SH2B adaptor protein 2	1.96	0.00239	0.106	0.162
Vgf	VGF nerve growth factor inducible	2.94	0.00489	0.134	0.205
Prkar1b	protein kinase, cAMP dependent regulatory, type I beta	1.55	0.0042	0.13	0.2
Adap1	ArfGAP with dual PH domains 1	1.63	0.00957	0.156	0.239
Ttyh3	tweety homolog 3 (Drosophila)	1.67	0.00102	0.0842	0.129
Slc29a4	solute carrier family 29 (nucleoside transporters), member 4	1.66	0.00724	0.148	0.227
Alox5ap	arachidonate 5-lipoxygenase activating protein	0.42	0.00389	0.127	0.195
A430035B10Rik	RIKEN cDNA A430035B10 gene	0.64	0.000444	0.06	0.0922
Lsm8	LSM8 homolog, U6 small nuclear RNA associated (S. cerevisiae)	0.52	0.00939	0.156	0.239
Flnc	filamin C, gamma	3.09	0.00049	0.06	0.0922
Akr1b8	aldo-keto reductase family 1, member B8	0.29	0.00511	0.134	0.205
Ssbp1	single-stranded DNA binding protein 1	0.64	0.00486	0.134	0.205
Tpk1	thiamine pyrophosphokinase	0.61	0.000248	0.0541	0.083
Tra2a	transformer 2 alpha homolog (Drosophila)	0.67	0.000257	0.0543	0.0833
Cbx3	chromobox 3	0.65	0.00866	0.154	0.236
Prr15	proline rich 15	0.41	0.00136	0.0881	0.135
Hpgds	hematopoietic prostaglandin D synthase	0.62	0.00388	0.127	0.195
Gadd45a	growth arrest and DNA-damage-inducible 45 alpha	0.54	0.00781	0.15	0.23
Ptcd3	pentatricopeptide repeat domain 3	0.67	0.00992	0.156	0.24
Rab11fip5	RAB11 family interacting protein 5 (class I)	1.56	0.000143	0.0376	0.0578
Tgfa	transforming growth factor alpha	2.07	0.00976	0.156	0.239
Usp18	ubiquitin specific peptidase 18	0.56	0.00763	0.149	0.229
Slc2a3	solute carrier family 2 (facilitated glucose transporter), member 3	1.86	0.0048	0.134	0.205
Kcna5	potassium voltage-gated channel, shaker-related subfamily, member 5	1.65	6.05e-05	0.0261	0.0401
Clec1a	C-type lectin domain family 1, member a	0.49	0.00692	0.148	0.227
Dusp16	dual specificity phosphatase 16	1.62	0.000658	0.0708	0.109
Mgp	matrix Gla protein	0.48	0.0061	0.145	0.223
Lyrm5	LYR motif containing 5	0.64	0.00199	0.0982	0.151
Gm6654	predicted pseudogene 6654	0.56	0.00907	0.156	0.239
Tmem238	transmembrane protein 238	0.36	0.00504	0.134	0.205
Ube2s	ubiquitin-conjugating enzyme E2S	0.43	0.00955	0.156	0.239
2810047C21Rik1	RIKEN cDNA 2810047C21 gene 1	0.39	0.00782	0.15	0.23
Tmem160	transmembrane protein 160	0.44	0.00876	0.154	0.237
Bcl3	B cell leukemia/lymphoma 3	2.97	0.00853	0.153	0.235
Fcgbp	Fc fragment of IgG binding protein	2.69	0.0074	0.149	0.228
Dpf1	D4, zinc and double PHD fingers family 1	1.51	0.00169	0.0948	0.146
Gpi1	glucose phosphate isomerase 1	1.58	0.00117	0.0862	0.132
Pdcd5	programmed cell death 5	0.41	0.00972	0.156	0.239
Ccne1	cyclin E1	1.55	0.00365	0.125	0.191
AW146154	expressed sequence AW146154	0.63	0.00281	0.117	0.179
9830147E19Rik	RIKEN cDNA 9830147E19 gene	0.49	0.00188	0.0971	0.149
Gm5595	predicted gene 5595	0.61	0.00019	0.0452	0.0694
Zfp473	zinc finger protein 473	2.12	0.00553	0.138	0.212
Mtag2	metastasis associated gene 2	0.54	0.00808	0.151	0.231
Gys1	glycogen synthase 1, muscle	1.5	0.0088	0.154	0.237
Klf13	Kruppel-like factor 13	1.6	0.000499	0.0601	0.0923
Fam103a1	family with sequence similarity 103, member A1	0.64	0.00667	0.148	0.227
Arrb1	arrestin, beta 1	1.98	0.00405	0.129	0.198
Kcne3	potassium voltage-gated channel, Isk-related subfamily, gene 3	0.15	1.16e-05	0.00982	0.0151
Trim12c	tripartite motif-containing 12C	0.58	0.00322	0.123	0.188
2610020H08Rik	RIKEN cDNA 2610020H08 gene	0.57	0.000446	0.06	0.0922
Gtf3c1	general transcription factor III C 1	1.52	0.00478	0.134	0.205
Sbk1	SH3-binding kinase 1	1.63	0.00212	0.101	0.154
Mvp	major vault protein	1.57	0.00774	0.149	0.229
Gpr26	G protein-coupled receptor 26	3.33	1.03e-05	0.00982	0.0151
Dusp8	dual specificity phosphatase 8	1.65	0.00955	0.156	0.239
Zfp958	zinc finger protein 958	0.66	0.00118	0.0862	0.132
Arglu1	arginine and glutamate rich 1	0.67	0.00706	0.148	0.227
Angpt2	angiopoietin 2	0.57	0.000484	0.06	0.0922
Ckap2	cytoskeleton associated protein 2	0.61	0.00181	0.0971	0.149
Plat	plasminogen activator, tissue	1.57	0.00144	0.0881	0.135
Zfp703	zinc finger protein 703	1.89	0.00827	0.152	0.233
Hmgb2	high mobility group box 2	0.56	0.00119	0.0862	0.132
Nat1	N-acetyl transferase 1	0.37	0.00502	0.134	0.205
Zfp930	zinc finger protein 930	0.62	1.78e-06	0.00381	0.00585
Gdf1	growth differentiation factor 1	1.63	0.00563	0.139	0.213
Crtc1	CREB regulated transcription coactivator 1	1.6	0.00425	0.13	0.2
Zfp617	zinc finger protein 617	0.61	0.00228	0.104	0.159
Wdr83os	cDNA sequence BC056474	0.57	0.00995	0.156	0.24
4921524J17Rik	RIKEN cDNA 4921524J17 gene	0.59	0.00893	0.156	0.239
Ndrg4	N-myc downstream regulated gene 4	1.55	0.00651	0.147	0.226
Nae1	NEDD8 activating enzyme E1 subunit 1	0.63	0.00478	0.134	0.205
Slc12a4	solute carrier family 12, member 4	1.56	0.00188	0.0971	0.149
Il34	interleukin 34	1.59	0.00417	0.13	0.2
Spata2l	spermatogenesis associated 2-like	1.61	0.00674	0.148	0.227
Pgbd5	piggyBac transposable element derived 5	1.56	0.00631	0.147	0.226
Egln1	EGL nine homolog 1 (C. elegans)	1.52	0.00547	0.137	0.211
Kbtbd3	kelch repeat and BTB (POZ) domain containing 3	0.65	5.97e-05	0.0261	0.0401
Dcun1d5	DCN1, defective in cullin neddylation 1, domain containing 5 (S. cerevisiae)	0.61	0.00226	0.103	0.159
9230110C19Rik	RIKEN cDNA 9230110C19 gene	0.62	0.00794	0.15	0.231
Pde4a	phosphodiesterase 4A, cAMP specific	1.65	0.00617	0.145	0.223
Ubash3b	ubiquitin associated and SH3 domain containing, B	1.73	0.0033	0.123	0.19
Rps25	ribosomal protein S25	0.38	0.00717	0.148	0.227
Tmprss4	transmembrane protease, serine 4	3.5	0.00648	0.147	0.226
Lingo1	leucine rich repeat and Ig domain containing 1	1.62	0.00621	0.145	0.223
Imp3	IMP3, U3 small nucleolar ribonucleoprotein, homolog (yeast)	0.55	0.00561	0.139	0.213
Pml	promyelocytic leukemia	1.51	0.00419	0.13	0.2
Smad3	SMAD family member 3	1.57	0.000285	0.0543	0.0833
2810417H13Rik	RIKEN cDNA 2810417H13 gene	0.65	0.0092	0.156	0.239
Tex9	testis expressed gene 9	0.56	0.00723	0.148	0.227
2310009A05Rik	RIKEN cDNA 2310009A05 gene	0.46	0.00828	0.152	0.233
Dag1	dystroglycan 1	1.58	0.00134	0.0881	0.135
Itga9	integrin alpha 9	1.89	0.00903	0.156	0.239
TrnS1	tRNA serine 1, mitochondrial	0.54	0.00937	0.156	0.239
ND4	NADH dehydrogenase 4, mitochondrial	0.62	0.00863	0.154	0.236
ND5	NADH dehydrogenase 5, mitochondrial	0.66	0.00033	0.0562	0.0862
TrnE	tRNA glutamic acid, mitochondrial	0.64	0.00113	0.0862	0.132
Hdac6	histone deacetylase 6	1.52	0.000104	0.0332	0.051
Rbm3	RNA binding motif protein 3	0.62	0.00928	0.156	0.239
Gpr34	G protein-coupled receptor 34	0.47	0.00659	0.147	0.226
Zfp300	zinc finger protein 300	0.65	0.00189	0.0971	0.149
Tmem47	transmembrane protein 47	0.66	0.00747	0.149	0.228
Apoo-ps	apolipoprotein O, pseudogene	0.44	0.00674	0.148	0.227
Nlgn3	neuroligin 3	1.72	0.00342	0.124	0.191
Taf9b	TAF9B RNA polymerase II, TATA box binding protein (TBP)-associated factor	0.64	0.00336	0.123	0.19
Hmgn5	high-mobility group nucleosome binding domain 5	0.62	0.00455	0.134	0.205
Cldn34c1	RIKEN cDNA 3110007F17 gene	0.64	0.00671	0.148	0.227
Morf4l2	mortality factor 4 like 2	0.55	0.00401	0.129	0.198
Tmsb15l	thymosin beta 15b like	0.41	0.00723	0.148	0.227
Fgd1	FYVE, RhoGEF and PH domain containing 1	1.6	0.00043	0.06	0.0922
Yy2	Yy2 transcription factor	0.58	0.00881	0.154	0.237
Synj2bp-cox16	-	0.45	0.00612	0.145	0.223
B230307C23Rik	RIKEN cDNA B230307C23 gene	0.61	0.00472	0.134	0.205
Zfp119b	zinc finger protein 119b	0.6	0.00222	0.103	0.159

## Sheet: 24hr__VGT_vs_hFc
gene	description	fold.change	uncorrected_P.value	q.value	BH.corrected.P.value
Rp1	retinitis pigmentosa 1 (human)	0.64	0.00218	0.0119	0.0221
Sgk3	serum/glucocorticoid regulated kinase 3	0.63	5.43e-06	0.000171	0.000316
Mcmdc2	minichromosome maintenance domain containing 2	0.62	0.00729	0.0269	0.0498
Ppp1r42	protein phosphatase 1, regulatory subunit 42	0.59	0.000337	0.00323	0.00596
Cspp1	centrosome and spindle pole associated protein 1	0.62	0.00386	0.0176	0.0326
Gm17644	predicted gene, 17644	0.44	7.32e-07	3.75e-05	6.94e-05
Pi15	peptidase inhibitor 15	0.52	0.00018	0.00203	0.00375
Rims1	regulating synaptic membrane exocytosis 1	1.84	0.0018	0.0104	0.0193
Gm20172	predicted gene, 20172	0.49	0.000112	0.00147	0.00271
Bag2	BCL2-associated athanogene 2	1.51	0.000184	0.00205	0.00379
Amer3	APC membrane recruitment 3	2.13	0.00299	0.015	0.0276
Arhgef4	Rho guanine nucleotide exchange factor (GEF) 4	1.89	9.11e-06	0.000249	0.000459
Fam168b	family with sequence similarity 168, member B	1.57	1.45e-05	0.000335	0.00062
Actr1b	ARP1 actin-related protein 1B, centractin beta	1.64	1.15e-06	5.2e-05	9.62e-05
Mitd1	MIT, microtubule interacting and transport, domain containing 1	0.63	0.00494	0.0207	0.0383
Lonrf2	LON peptidase N-terminal domain and ring finger 2	2.06	8.58e-06	0.000238	0.00044
Chst10	carbohydrate sulfotransferase 10	1.86	0.000168	0.00195	0.0036
Dnah7b	dynein, axonemal, heavy chain 7B	0.49	1.23e-05	0.000304	0.000561
Tmem194b	transmembrane protein 194B	0.63	0.00611	0.0241	0.0446
Stk17b	serine/threonine kinase 17b (apoptosis-inducing)	0.65	0.00197	0.0111	0.0206
Ccdc150	coiled-coil domain containing 150	0.4	0.00883	0.0308	0.0569
Ankrd44	ankyrin repeat domain 44	0.63	0.000405	0.00371	0.00685
Satb2	special AT-rich sequence binding protein 2	5.16	0.000262	0.00267	0.00494
Clk1	CDC-like kinase 1	0.54	3.32e-07	2.19e-05	4.05e-05
Fam126b	family with sequence similarity 126, member B	0.65	0.00018	0.00203	0.00375
Tmem169	transmembrane protein 169	1.61	0.000266	0.0027	0.00499
March4	membrane-associated ring finger (C3HC4) 4	1.72	0.000513	0.00439	0.00812
Cxcr2	chemokine (C-X-C motif) receptor 2	0.55	0.00208	0.0115	0.0213
Col4a4	collagen, type IV, alpha 4	0.62	0.00162	0.00969	0.0179
Dner	delta/notch-like EGF-related receptor	2.35	4.08e-06	0.000138	0.000254
Gm7609	predicted pseudogene 7609	0.5	0.00122	0.00793	0.0147
Efhd1	EF hand domain containing 1	1.6	0.00805	0.0288	0.0532
Sh3bp4	SH3-domain binding protein 4	1.74	9.02e-07	4.38e-05	8.09e-05
Agap1	ArfGAP with GTPase domain, ankyrin repeat and PH domain 1	1.66	3.81e-06	0.000131	0.000242
Hdac4	histone deacetylase 4	1.53	0.00664	0.0254	0.0469
Gpc1	glypican 1	1.56	0.000313	0.00305	0.00565
C1ql2	complement component 1, q subcomponent-like 2	2.47	8.6e-06	0.000238	0.00044
Tmem163	transmembrane protein 163	3.77	1.69e-05	0.000368	0.00068
Yod1	YOD1 OTU deubiquitinating enzyme 1 homologue (S. cerevisiae)	0.65	0.00282	0.0144	0.0265
Rassf5	Ras association (RalGDS/AF-6) domain family member 5	1.63	0.00272	0.014	0.0259
Cntn2	contactin 2	2.57	7.66e-06	0.000217	0.000402
Lrrn2	leucine rich repeat protein 2, neuronal	2.18	1.85e-05	0.000394	0.000729
Mdm4	transformed mouse 3T3 cell double minute 4	0.64	0.000343	0.00326	0.00602
Adora1	adenosine A1 receptor	1.73	0.00016	0.00187	0.00345
Syt2	synaptotagmin II	1.88	0.000797	0.00597	0.011
Arl8a	ADP-ribosylation factor-like 8A	1.62	1.13e-05	0.000286	0.00053
Zbtb41	zinc finger and BTB domain containing 41 homolog	0.65	0.00384	0.0176	0.0325
Aspm	asp (abnormal spindle)-like, microcephaly associated (Drosophila)	0.38	0.00761	0.0277	0.0513
Cfh	complement component factor h	0.59	4.66e-05	0.000762	0.00141
Rgs8	regulator of G-protein signaling 8	1.94	2.3e-08	2.77e-06	5.12e-06
Rgs16	regulator of G-protein signaling 16	1.83	3.39e-07	2.2e-05	4.07e-05
Mr1	major histocompatibility complex, class I-related	0.6	0.0014	0.00882	0.0163
Fam163a	family with sequence similarity 163, member A	2.24	1.92e-05	0.000401	0.000742
Brinp2	bone morphogenic protein/retinoic acid inducible neural-specific 2	2.16	0.000129	0.00162	0.003
Pappa2	pappalysin 2	2.12	0.00153	0.00932	0.0172
Dnm3os	dynamin 3, opposite strand	0.57	1.44e-06	6.32e-05	0.000117
Rgs5	regulator of G-protein signaling 5	0.61	0.00701	0.0263	0.0486
Rgs4	regulator of G-protein signaling 4	1.97	0.00272	0.014	0.0259
Cd84	CD84 antigen	0.63	0.000819	0.00608	0.0112
Casq1	calsequestrin 1	0.52	0.00631	0.0246	0.0455
Igsf8	immunoglobulin superfamily, member 8	2.02	3.69e-07	2.32e-05	4.29e-05
Kcnj9	potassium inwardly-rectifying channel, subfamily J, member 9	1.52	0.00151	0.00925	0.0171
Tagln2	transgelin 2	1.55	0.00278	0.0142	0.0263
Crp	C-reactive protein, pentraxin-related	0.46	0.00941	0.0322	0.0595
Aim2	absent in melanoma 2	0.57	0.00749	0.0275	0.0508
Pld5	phospholipase D family, member 5	0.66	0.00122	0.00795	0.0147
Cox20	COX20 Cox2 chaperone	0.62	8.9e-05	0.00124	0.0023
Efcab2	EF-hand calcium binding domain 2	0.66	0.00162	0.0097	0.0179
Lefty2	left-right determination factor 2	4.78	0.00128	0.00823	0.0152
Susd4	sushi domain containing 4	1.57	0.000457	0.00405	0.00748
Mark1	MAP/microtubule affinity-regulating kinase 1	1.71	5.47e-05	0.000856	0.00158
Kcnk2	potassium channel, subfamily K, member 2	3.04	3.08e-06	0.000114	0.00021
Rps6kc1	ribosomal protein S6 kinase polypeptide 1	1.6	0.000101	0.00137	0.00253
Sertad4	SERTA domain containing 4	1.67	0.00182	0.0105	0.0194
Syt14	synaptotagmin XIV	0.64	0.0019	0.0109	0.0201
A330023F24Rik	RIKEN cDNA A330023F24 gene	0.65	0.00678	0.0257	0.0475
B020014A21Rik	RIKEN cDNA B020014A21 gene	0.51	0.00878	0.0307	0.0567
Akap12	A kinase (PRKA) anchor protein (gravin) 12	1.82	0.000908	0.00645	0.0119
Lrp11	low density lipoprotein receptor-related protein 11	1.66	1.87e-09	4.17e-07	7.72e-07
Grm1	glutamate receptor, metabotropic 1	1.74	0.00151	0.00925	0.0171
Perp	PERP, TP53 apoptosis effector	0.5	0.00695	0.0261	0.0483
Gm20139	predicted gene, 20139	0.52	4.33e-05	0.000724	0.00134
Arhgap18	Rho GTPase activating protein 18	0.62	0.000204	0.0022	0.00407
Gm20300	predicted gene, 20300	0.66	0.000299	0.00294	0.00544
D830005E20Rik	RIKEN cDNA D830005E20 gene	0.55	0.00801	0.0287	0.0531
Zufsp	zinc finger with UFM1-specific peptidase domain	0.6	5.39e-05	0.000847	0.00157
Frk	fyn-related kinase	0.46	0.000255	0.00261	0.00483
Fyn	Fyn proto-oncogene	1.97	1.59e-10	6.57e-08	1.22e-07
Wasf1	WAS protein family, member 1	1.64	0.000512	0.00439	0.00812
9030612E09Rik	RIKEN cDNA 9030612E09 gene	0.58	0.00949	0.0323	0.0597
Slc35f1	solute carrier family 35, member F1	1.65	6.25e-05	0.000949	0.00175
Tbc1d32	TBC1 domain family, member 32	0.66	0.000854	0.00625	0.0116
Msl3l2	male-specific lethal 3-like 2 (Drosophila)	1.58	0.00228	0.0123	0.0228
Lims1	LIM and senescent cell antigen-like domains 1	0.64	1.2e-05	0.000298	0.000551
Unc5b	unc-5 homolog B (C. elegans)	1.66	0.0048	0.0203	0.0375
Hk1	hexokinase 1	1.67	0.0021	0.0116	0.0215
Prmt2	protein arginine N-methyltransferase 2	1.88	1.85e-06	7.75e-05	0.000143
Adarb1	adenosine deaminase, RNA-specific, B1	1.61	0.00254	0.0134	0.0248
Pfkl	phosphofructokinase, liver, B-type	1.97	8.99e-07	4.38e-05	8.09e-05
Pdxk	pyridoxal (pyridoxine, vitamin B6) kinase	1.68	1.71e-09	3.94e-07	7.27e-07
2610008E11Rik	RIKEN cDNA 2610008E11 gene	0.63	0.000124	0.00158	0.00293
Shc2	SHC (Src homology 2 domain containing) transforming protein 2	1.79	1.45e-05	0.000335	0.00062
Hcn2	hyperpolarization-activated, cyclic nucleotide-gated K+ 2	1.76	0.0044	0.0192	0.0355
Palm	paralemmin	1.87	0.000309	0.00302	0.00559
Lppr3	cDNA sequence BC005764	2.04	2.68e-10	9.38e-08	1.73e-07
Apc2	adenomatosis polyposis coli 2	1.52	0.00428	0.0189	0.035
Btbd2	BTB (POZ) domain containing 2	1.61	2.74e-06	0.000104	0.000191
Gng7	guanine nucleotide binding protein (G protein), gamma 7	2.56	2.14e-11	2.87e-08	5.3e-08
Diras1	DIRAS family, GTP-binding RAS-like 1	1.9	0.00957	0.0325	0.06
Slc39a3	solute carrier family 39 (zinc transporter), member 3	1.54	0.00152	0.00927	0.0171
Sgta	small glutamine-rich tetratricopeptide repeat (TPR)-containing, alpha	1.55	1.33e-05	0.000318	0.000588
Eef2	eukaryotic translation elongation factor 2	1.57	0.000136	0.00168	0.00311
Atcay	ataxia, cerebellar, Cayman type homolog (human)	2.08	3.76e-06	0.00013	0.00024
Zfr2	zinc finger RNA binding protein 2	1.75	5.81e-05	0.000896	0.00166
Matk	megakaryocyte-associated tyrosine kinase	1.64	0.00399	0.018	0.0333
Pip5k1c	phosphatidylinositol-4-phosphate 5-kinase, type 1 gamma	1.91	4.35e-10	1.3e-07	2.4e-07
Fzr1	fizzy/cell division cycle 20 related 1 (Drosophila)	1.6	6.05e-07	3.27e-05	6.04e-05
BC025920	zinc finger protein pseudogene	0.64	0.00105	0.00714	0.0132
Gm10778	predicted gene 10778	0.61	0.000129	0.00163	0.00301
Zfp781	zinc finger protein 781	0.66	0.00304	0.0151	0.028
AU041133	expressed sequence AU041133	0.65	0.00128	0.00823	0.0152
Slc41a2	solute carrier family 41, member 2	1.91	3.91e-06	0.000133	0.000247
A230046K03Rik	RIKEN cDNA A230046K03 gene	0.66	3.82e-05	0.000664	0.00123
Btbd11	BTB (POZ) domain containing 11	1.83	0.000205	0.0022	0.00408
2310039L15Rik	RIKEN cDNA 2310039L15 gene	0.54	4.04e-05	0.00069	0.00127
Tmtc3	transmembrane and tetratricopeptide repeat containing 3	0.64	0.000689	0.00538	0.00995
Cep290	centrosomal protein 290	0.54	0.000137	0.00169	0.00312
Gm5136	predicted gene 5136	0.63	0.00817	0.0291	0.0538
Osbpl8	oxysterol binding protein-like 8	0.63	2.63e-05	0.000495	0.000916
A130077B15Rik	RIKEN cDNA A130077B15 gene	0.53	3.93e-06	0.000134	0.000247
Fam19a2	family with sequence similarity 19, member A2	2.06	0.000143	0.00174	0.00322
B4galnt1	beta-1,4-N-acetyl-galactosaminyl transferase 1	2.15	9.91e-08	7.98e-06	1.47e-05
Kif5a	kinesin family member 5A	2.06	3.82e-07	2.35e-05	4.34e-05
Ndufa4l2	NADH dehydrogenase (ubiquinone) 1 alpha subcomplex, 4-like 2	1.63	0.000545	0.00457	0.00845
Shmt2	serine hydroxymethyltransferase 2 (mitochondrial)	1.57	0.000865	0.0063	0.0116
Nxph4	neurexophilin 4	1.77	0.00507	0.0211	0.039
Inpp5j	inositol polyphosphate 5-phosphatase J	2.32	1.61e-05	0.000355	0.000656
Nefh	neurofilament, heavy polypeptide	1.58	0.000152	0.0018	0.00334
Nacad	NAC alpha domain containing	1.58	0.000151	0.0018	0.00334
Abca13	ATP-binding cassette, sub-family A (ABC1), member 13	0.58	6.72e-06	0.0002	0.00037
4930512M02Rik	RIKEN cDNA 4930512M02 gene	0.5	0.000705	0.00548	0.0101
Cobl	cordon-bleu WH2 repeat	1.51	0.00132	0.00841	0.0155
Gm12018	Derived by automated computational analysis using gene prediction method: Gnomon.	0.58	0.00601	0.0239	0.0442
Spred2	sprouty-related, EVH1 domain containing 2	2.12	0.000871	0.00632	0.0117
Slc1a4	solute carrier family 1 (glutamate/neutral amino acid transporter), member 4	1.65	0.0028	0.0143	0.0264
Zrsr1	zinc finger (CCCH type), RNA binding motif and serine/arginine rich 1	0.63	9.56e-06	0.000255	0.000471
Pus10	pseudouridylate synthase 10	0.6	1.13e-05	0.000286	0.00053
Ccdc85a	coiled-coil domain containing 85A	1.93	0.00152	0.00927	0.0171
Erlec1	endoplasmic reticulum lectin 1	0.58	8.37e-07	4.16e-05	7.69e-05
Nsg2	neuron specific gene family member 2	1.96	0.00136	0.00866	0.016
Hmmr	hyaluronan mediated motility receptor (RHAMM)	0.56	0.000622	0.005	0.00925
Adra1b	adrenergic receptor, alpha 1b	2.47	0.00207	0.0115	0.0213
Cyfip2	cytoplasmic FMR1 interacting protein 2	1.98	6.71e-10	1.86e-07	3.44e-07
Gfpt2	glutamine fructose-6-phosphate transaminase 2	1.95	0.000489	0.00423	0.00782
Tbc1d9b	TBC1 domain family, member 9B	1.55	1.42e-06	6.26e-05	0.000116
Sqstm1	sequestosome 1	1.54	1.68e-05	0.000367	0.000678
Mgat4b	mannoside acetylglucosaminyltransferase 4, isoenzyme B	1.5	0.00026	0.00265	0.0049
Clk4	CDC like kinase 4	0.62	7.27e-05	0.00107	0.00198
Vdac1	voltage-dependent anion channel 1	1.55	0.000448	0.00399	0.00738
Fnip1	folliculin interacting protein 1	0.66	0.000128	0.00162	0.003
Rnf187	ring finger protein 187	1.74	2.5e-05	0.000479	0.000885
Gm16062	predicted gene 16062	0.5	0.000866	0.0063	0.0116
Tom1l2	target of myb1-like 2 (chicken)	1.63	7.22e-05	0.00107	0.00197
Usp22	ubiquitin specific peptidase 22	1.79	1.17e-09	2.85e-07	5.27e-07
Rnf112	ring finger protein 112	1.56	0.00219	0.012	0.0222
Trpv2	transient receptor potential cation channel, subfamily V, member 2	1.84	0.00107	0.00724	0.0134
Lrrc75a	family with sequence similarity 211, member A	1.54	0.00125	0.0081	0.015
Arhgap44	Rho GTPase activating protein 44	2.06	2.11e-05	0.000426	0.000788
Gm15772	ribosomal protein L26 pseudogene	0.66	0.0061	0.0241	0.0446
Vamp2	vesicle-associated membrane protein 2	1.61	1.69e-07	1.21e-05	2.23e-05
Kcnab3	potassium voltage-gated channel, shaker-related subfamily, beta member 3	2.12	6.84e-07	3.55e-05	6.57e-05
Fgf11	fibroblast growth factor 11	1.76	8.17e-05	0.00117	0.00216
Wscd1	WSC domain containing 1	1.73	1.42e-08	1.94e-06	3.58e-06
Rap1gap2	RAP1 GTPase activating protein 2	1.9	0.00011	0.00145	0.00267
E130309D14Rik	RIKEN cDNA E130309D14 gene	1.62	0.00192	0.0109	0.0202
Ccdc55	coiled-coil domain containing 55	0.59	0.000831	0.00612	0.0113
Coro6	coronin 6	3.64	0.000586	0.00478	0.00884
Ankrd13b	ankyrin repeat domain 13b	1.75	0.000668	0.00526	0.00972
Git1	G protein-coupled receptor kinase-interactor 1	1.67	9.7e-06	0.000256	0.000474
Trp53i13	transformation related protein 53 inducible protein 13	1.55	0.00837	0.0296	0.0547
Nufip2	nuclear fragile X mental retardation protein interacting protein 2	0.63	0.000264	0.00269	0.00497
Sez6	seizure related gene 6	1.59	1.93e-05	0.000402	0.000744
BC030499	cDNA sequence BC030499	0.66	0.00714	0.0266	0.0492
Rab11fip4	RAB11 family interacting protein 4 (class II)	1.86	5.15e-05	0.000824	0.00152
Asic2	acid-sensing (proton-gated) ion channel 2	1.85	0.00013	0.00163	0.00302
Rasl10b	RAS-like, family 10, member B	1.69	0.00101	0.00691	0.0128
E230016K23Rik	RIKEN cDNA E230016K23 gene	0.5	0.00073	0.00563	0.0104
Bcas3	breast carcinoma amplified sequence 3	1.51	0.000104	0.00139	0.00258
Brip1	BRCA1 interacting protein C-terminal helicase 1	0.59	0.00224	0.0122	0.0225
Ints2	integrator complex subunit 2	0.67	0.000449	0.00399	0.00738
Scpep1os	serine carboxypeptidase 1, opposite strand	0.52	0.000573	0.00471	0.0087
Luc7l3	LUC7-like 3 (S. cerevisiae)	0.57	1.39e-06	6.16e-05	0.000114
Samd14	sterile alpha motif domain containing 14	1.68	1.04e-05	0.000272	0.000503
Lasp1	LIM and SH3 protein 1	1.68	6.92e-08	6.4e-06	1.18e-05
Stac2	SH3 and cysteine rich domain 2	1.57	2.28e-05	0.000449	0.00083
Psmd3	proteasome (prosome, macropain) 26S subunit, non-ATPase, 3	1.56	3.42e-05	0.000619	0.00114
Hap1	huntingtin-associated protein 1	1.59	0.000152	0.0018	0.00334
Jup	junction plakoglobin	1.82	1.06e-07	8.34e-06	1.54e-05
Cnp	2',3'-cyclic nucleotide 3' phosphodiesterase	1.56	0.000173	0.00199	0.00367
Zfp385c	zinc finger protein 385C	2.44	2.41e-05	0.000467	0.000862
Stat5b	signal transducer and activator of transcription 5B	1.55	0.000104	0.0014	0.00258
Atp6v0a1	ATPase, H+ transporting, lysosomal V0 subunit A1	1.57	2.24e-06	8.95e-05	0.000166
Tubg2	tubulin, gamma 2	1.94	0.00175	0.0102	0.0188
Mpp3	membrane protein, palmitoylated 3 (MAGUK p55 subfamily member 3)	1.79	0.000113	0.00148	0.00274
Mpp2	membrane protein, palmitoylated 2 (MAGUK p55 subfamily member 2)	2.01	3.18e-08	3.37e-06	6.22e-06
Higd1b	HIG1 domain family, member 1B	0.58	0.00239	0.0127	0.0236
Gfap	glial fibrillary acidic protein	1.71	0.000109	0.00144	0.00266
C1ql1	complement component 1, q subcomponent-like 1	2.37	4.99e-05	0.000805	0.00149
Dcakd	dephospho-CoA kinase domain containing	1.76	1.29e-05	0.00031	0.000573
Nsf	N-ethylmaleimide sensitive fusion protein	1.57	2.95e-08	3.28e-06	6.07e-06
Mapt	microtubule-associated protein tau	1.89	5.49e-11	4.06e-08	7.51e-08
Mrc2	mannose receptor, C type 2	2.04	0.00142	0.00889	0.0164
Limd2	LIM domain containing 2	1.74	0.00488	0.0206	0.038
Mir3064	microRNA 3064	0.57	0.0016	0.00963	0.0178
Cacng5	calcium channel, voltage-dependent, gamma subunit 5	2.15	0.00187	0.0107	0.0198
Cep112	centrosomal protein 112	0.62	0.000361	0.00338	0.00626
Sstr2	somatostatin receptor 2	2.51	0.00594	0.0238	0.0439
Cdc42ep4	CDC42 effector protein (Rho GTPase binding) 4	1.62	0.00173	0.0101	0.0187
Ush1g	Usher syndrome 1G	2.04	0.00731	0.027	0.0499
Hid1	HID1 domain containing	1.68	2.87e-06	0.000108	0.000199
Wbp2	WW domain binding protein 2	1.74	5.37e-09	8.82e-07	1.63e-06
Rnf157	ring finger protein 157	1.57	7.32e-05	0.00108	0.00199
Cygb	cytoglobin	1.82	0.000149	0.00179	0.00331
Mgat5b	mannoside acetylglucosaminyltransferase 5, isoenzyme B	2.28	1.51e-07	1.11e-05	2.04e-05
Engase	endo-beta-N-acetylglucosaminidase	1.54	0.00404	0.0181	0.0335
Cbx4	chromobox 4	1.62	3.45e-05	0.000622	0.00115
Tbc1d16	TBC1 domain family, member 16	1.66	0.00189	0.0108	0.02
Aatk	apoptosis-associated tyrosine kinase	1.64	0.00118	0.00779	0.0144
Actg1	actin, gamma, cytoplasmic 1	1.6	6.36e-08	6.1e-06	1.13e-05
Hgs	HGF-regulated tyrosine kinase substrate	1.77	7.72e-09	1.19e-06	2.21e-06
Arhgdia	Rho GDP dissociation inhibitor (GDI) alpha	1.53	3.07e-05	0.000563	0.00104
Rac3	RAS-related C3 botulinum substrate 3	1.61	0.00779	0.0281	0.052
Fasn	fatty acid synthase	1.68	8.1e-07	4.05e-05	7.49e-05
Slc16a3	solute carrier family 16 (monocarboxylic acid transporters), member 3	2.01	4.19e-06	0.000139	0.000257
Kif3c	kinesin family member 3C	1.61	1.13e-05	0.000286	0.00053
Dnmt3a	DNA methyltransferase 3A	1.51	0.00458	0.0197	0.0364
Efr3b	EFR3 homolog B (S. cerevisiae)	1.73	0.000511	0.00439	0.00811
Adcy3	adenylate cyclase 3	1.98	3.42e-07	2.2e-05	4.08e-05
Pum2	pumilio 2 (Drosophila)	0.63	0.000805	0.00601	0.0111
Kcnf1	potassium voltage-gated channel, subfamily F, member 1	2.21	0.00622	0.0244	0.0451
Rnf144a	ring finger protein 144A	1.56	5.49e-05	0.000856	0.00158
Cmpk2	cytidine monophosphate (UMP-CMP) kinase 2, mitochondrial	1.58	0.00397	0.0179	0.0332
Dcdc2c	doublecortin domain containing 2C	0.55	1.63e-06	6.99e-05	0.000129
Dus4l	dihydrouridine synthase 4-like (S. cerevisiae)	0.54	0.000268	0.00272	0.00502
Gdap10	ganglioside-induced differentiation-associated-protein 10	0.57	0.000177	0.00201	0.00372
Arl4a	ADP-ribosylation factor-like 4A	0.64	0.000932	0.00656	0.0121
Srp54c	signal recognition particle 54C	0.54	0.00431	0.019	0.0351
Insm2	insulinoma-associated 2	0.57	0.0084	0.0296	0.0548
Mbip	MAP3K12 binding inhibitory protein 1	0.66	0.000915	0.00649	0.012
Pnn	pinin	0.62	0.000369	0.00343	0.00633
Prpf39	PRP39 pre-mRNA processing factor 39 homolog (yeast)	0.62	0.000605	0.00489	0.00903
Gm17821	DDB1 and CUL4 associated factor 5 pseudogene	0.52	1.58e-07	1.14e-05	2.1e-05
Nemf	nuclear export mediator factor	0.64	1.23e-05	0.000304	0.000561
Rtn1	reticulon 1	1.94	1.36e-05	0.000324	0.000599
4930447C04Rik	RIKEN cDNA 4930447C04 gene	0.59	0.00208	0.0115	0.0213
Trmt5	TRM5 tRNA methyltransferase 5	0.66	0.00394	0.0178	0.033
Slc38a6	solute carrier family 38, member 6	0.57	0.00365	0.017	0.0314
2210039B01Rik	RIKEN cDNA 2210039B01 gene	0.58	0.00442	0.0192	0.0356
Syt16	synaptotagmin XVI	1.91	0.00263	0.0137	0.0254
Rplp2-ps1	ribosomal protein, large P2, pseudogene 1	0.6	0.00269	0.0139	0.0257
Hspa2	heat shock protein 2	1.93	3.16e-08	3.37e-06	6.22e-06
Rab15	RAB15, member RAS oncogene family	2.29	3.04e-06	0.000113	0.000208
Galnt16	UDP-N-acetyl-alpha-D-galactosamine:polypeptide N-acetylgalactosaminyltransferase 16	1.72	0.00372	0.0172	0.0317
Plekhd1	pleckstrin homology domain containing, family D (with coiled-coil domains) member 1	1.55	0.00435	0.0191	0.0352
Gm20337	predicted gene, 20337	0.52	0.000487	0.00422	0.0078
Synj2bp	synaptojanin 2 binding protein	0.64	1.44e-05	0.000335	0.00062
Ttc9	tetratricopeptide repeat domain 9	1.86	3.38e-07	2.2e-05	4.07e-05
Rbm25	RNA binding motif protein 25	0.62	0.000371	0.00344	0.00635
Ccdc176	coiled-coil domain containing 176	0.56	0.00107	0.00724	0.0134
Vsx2	visual system homeobox 2	1.59	3.34e-05	0.000607	0.00112
Rps6kl1	ribosomal protein S6 kinase-like 1	1.79	0.000149	0.00179	0.00331
Tgfb3	transforming growth factor, beta 3	1.92	1.09e-06	5.01e-05	9.26e-05
Irf2bpl	interferon regulatory factor 2 binding protein-like	1.54	0.00069	0.00538	0.00995
Tc2n	tandem C2 domains, nuclear	0.46	0.000128	0.00162	0.003
Trip11	thyroid hormone receptor interactor 11	0.66	0.00368	0.0171	0.0316
Chga	chromogranin A	1.83	2.8e-10	9.39e-08	1.74e-07
Tunar	Tcl1 upstream neural differentiation associated RNA	1.91	0.00039	0.00358	0.00661
Bcl11b	B cell leukemia/lymphoma 11B	2.18	0.00686	0.0259	0.0479
Cyp46a1	cytochrome P450, family 46, subfamily a, polypeptide 1	1.71	7.06e-06	0.000207	0.000383
Wars	tryptophanyl-tRNA synthetase	1.63	8.06e-08	6.98e-06	1.29e-05
Hsp90aa1	heat shock protein 90, alpha (cytosolic), class A member 1	0.61	8e-05	0.00116	0.00214
6030440G07Rik	RIKEN cDNA 6030440G07 gene	0.51	0.00372	0.0172	0.0317
Traf3	TNF receptor-associated factor 3	1.51	0.00116	0.00763	0.0141
Klc1	kinesin light chain 1	1.61	0.00051	0.00439	0.00811
Tdrd9	tudor domain containing 9	1.58	0.00429	0.0189	0.035
Tmem179	transmembrane protein 179	2.26	8.64e-06	0.000238	0.000441
Cep170b	centrosomal protein 170B	1.74	5.06e-06	0.000162	0.000299
Btbd6	BTB (POZ) domain containing 6	1.55	0.0015	0.00925	0.0171
Fam208b	cDNA sequence BC016423	0.64	0.000771	0.00586	0.0108
Gm10336	predicted gene 10336	0.53	0.0029	0.0147	0.0271
Gng4	guanine nucleotide binding protein (G protein), gamma 4	2.79	9.64e-05	0.00132	0.00244
Inhba	inhibin beta-A	0.42	0.00161	0.00966	0.0179
Elmo1	engulfment and cell motility 1	1.97	0.0012	0.00783	0.0145
Pgbd1	piggyBac transposable element derived 1	0.31	0.00532	0.0219	0.0406
Zscan26	zinc finger and SCAN domain containing 26	0.54	3.58e-05	0.00064	0.00118
Zfp184	zinc finger protein 184 (Kruppel-like)	0.59	3.81e-05	0.000664	0.00123
Zfp322a	zinc finger protein 322A	0.66	0.000943	0.0066	0.0122
Slc17a1	solute carrier family 17 (sodium phosphate), member 1	0.46	0.000281	0.00282	0.0052
Fam65b	family with sequence similarity 65, member B	1.85	0.000333	0.0032	0.00591
Nrsn1	neurensin 1	2.09	0.000607	0.00489	0.00905
Tubb2a	tubulin, beta 2A class IIA	1.69	0.00629	0.0246	0.0455
Tubb2b	tubulin, beta 2B class IIB	1.68	2.12e-05	0.000428	0.000791
Slc22a23	solute carrier family 22, member 23	1.56	0.00119	0.00779	0.0144
Nhlrc1	NHL repeat containing 1	1.51	0.00946	0.0322	0.0596
Dek	DEK oncogene (DNA binding)	0.61	8.45e-05	0.0012	0.00222
Ecm2	extracellular matrix protein 2, female organ and adipocyte specific	0.58	0.00936	0.0321	0.0593
Omd	osteomodulin	0.42	0.0045	0.0195	0.036
Nol8	nucleolar protein 8	0.61	0.000204	0.0022	0.00407
S1pr3	sphingosine-1-phosphate receptor 3	1.63	0.00382	0.0175	0.0324
Diras2	DIRAS family, GTP-binding RAS-like 2	1.84	2.24e-08	2.73e-06	5.05e-06
Gprin1	G protein-regulated inducer of neurite outgrowth 1	2.5	2.82e-21	2.27e-17	4.2e-17
Sncb	synuclein, beta	1.57	0.00552	0.0226	0.0418
Dbn1	drebrin 1	1.53	0.0045	0.0195	0.036
Cxcl14	chemokine (C-X-C motif) ligand 14	2.52	9.29e-05	0.00128	0.00237
Spock1	sparc/osteonectin, cwcv and kazal-like domains proteoglycan 1	1.64	1.32e-05	0.000317	0.000586
Gkap1	G kinase anchoring protein 1	0.63	0.000429	0.00388	0.00717
Slc28a3	solute carrier family 28 (sodium-coupled nucleoside transporter), member 3	0.45	0.00199	0.0112	0.0207
Ctla2b	cytotoxic T lymphocyte-associated protein 2 beta	0.35	0.00938	0.0321	0.0594
Ctla2a	cytotoxic T lymphocyte-associated protein 2 alpha	0.55	4.13e-10	1.28e-07	2.36e-07
BC052688	cDNA sequence BC052688	0.49	0.00639	0.0248	0.0459
Zfp935	zinc finger protein 935	0.66	0.00264	0.0138	0.0255
Zfp934	zinc finger protein 934	0.47	0.000346	0.00328	0.00606
Slc35d2	solute carrier family 35, member D2	0.53	0.00895	0.0311	0.0576
Zfp458	zinc finger protein 458	0.65	0.00788	0.0284	0.0524
Zfp953	zinc finger protein 953	0.52	0.000216	0.0023	0.00425
Zfp429	zinc finger protein 429	0.6	0.00403	0.0181	0.0335
Zfp874b	zinc finger protein 874b	0.58	5.05e-07	2.88e-05	5.32e-05
Zfp748	zinc finger protein 748	0.63	0.00107	0.00725	0.0134
Zfp729b	expressed sequence AA987161	0.62	0.00462	0.0198	0.0366
Zfp738	zinc finger protein 738	0.62	0.000112	0.00147	0.00272
Zfp65	zinc finger protein 65	0.58	0.000128	0.00162	0.003
Adcy2	adenylate cyclase 2	1.59	1.58e-05	0.000354	0.000654
Ube2ql1	ubiquitin-conjugating enzyme E2Q family-like 1	2.28	9.25e-06	0.000251	0.000464
Irx2	Iroquois related homeobox 2 (Drosophila)	3.03	0.000575	0.00472	0.00872
Irx4	Iroquois related homeobox 4 (Drosophila)	3.41	1.24e-05	0.000304	0.000561
Slc6a18	solute carrier family 6 (neurotransmitter transporter), member 18	0.63	0.00733	0.027	0.0499
Tppp	tubulin polymerization promoting protein	2.01	0.000538	0.00454	0.00839
Erap1	endoplasmic reticulum aminopeptidase 1	0.61	4.22e-05	0.00071	0.00131
Pcsk1	proprotein convertase subtilisin/kexin type 1	2.09	0.00171	0.0101	0.0186
Ell2	elongation factor RNA polymerase II 2	0.59	0.00617	0.0243	0.0449
Pou5f2	POU domain class 5, transcription factor 2	0.44	0.000132	0.00165	0.00305
Mef2c	myocyte enhancer factor 2C	0.62	5.1e-06	0.000162	0.0003
C130071C03Rik	RIKEN cDNA C130071C03 gene	0.61	0.000115	0.00149	0.00276
Mtx3	metaxin 3	0.56	8.04e-08	6.98e-06	1.29e-05
Arsb	arylsulfatase B	1.62	0.000402	0.00369	0.00681
Srek1	splicing regulatory glutamine/lysine-rich protein 1	0.62	2.6e-06	0.0001	0.000186
Adamts6	a disintegrin-like and metallopeptidase (reprolysin type) with thrombospondin type 1 motif, 6	0.45	0.00665	0.0254	0.0469
Kif2a	kinesin family member 2A	0.66	1.76e-06	7.43e-05	0.000137
Zswim6	zinc finger SWIM-type containing 6	0.65	0.000877	0.00634	0.0117
Esm1	endothelial cell-specific molecule 1	0.31	0.000288	0.00286	0.00528
4933413L06Rik	RIKEN cDNA 4933413L06 gene	0.54	0.000184	0.00205	0.00379
Zfp131	zinc finger protein 131	0.66	6.54e-05	0.000979	0.00181
Lrrc3b	leucine rich repeat containing 3B	1.94	0.00898	0.0312	0.0577
Zmiz1	zinc finger, MIZ-type containing 1	1.59	8.85e-08	7.42e-06	1.37e-05
Tmem254a	transmembrane protein 254a	13.21	0.00783	0.0282	0.0522
Tmem254b	transmembrane protein 254b	0.54	0.00545	0.0224	0.0413
Fam208a	DNA segment, Chr 14, Abbott 1 expressed	0.62	0.00025	0.00258	0.00477
Ccdc66	coiled-coil domain containing 66	0.58	8.85e-06	0.000242	0.000448
Gnl3	guanine nucleotide binding protein-like 3 (nucleolar)	0.66	0.000226	0.00238	0.0044
Chat	choline acetyltransferase	3.28	1.7e-08	2.14e-06	3.95e-06
Mapk8	mitogen-activated protein kinase 8	0.61	2.46e-05	0.000474	0.000875
Gdf10	growth differentiation factor 10	2.46	0.009	0.0312	0.0578
Gdf2	growth differentiation factor 2	15.61	0.000265	0.00269	0.00497
Zfp488	zinc finger protein 488	0.55	1.21e-08	1.74e-06	3.22e-06
Styx	serine/threonine/tyrosine interaction protein	0.58	1.23e-05	0.000304	0.000561
Ktn1	kinectin 1	0.64	0.000104	0.00139	0.00257
Otx2os1	orthodenticle homolog 2 opposite strand 1	0.6	0.00353	0.0166	0.0307
4933429O19Rik	RIKEN cDNA 4933429O19 gene	0.59	0.00534	0.022	0.0407
Slc22a17	solute carrier family 22 (organic cation transporter), member 17	1.7	0.000139	0.0017	0.00315
Jph4	junctophilin 4	1.64	0.00439	0.0192	0.0355
Cpne6	copine VI	2.17	7.45e-08	6.66e-06	1.23e-05
Cenpj	centromere protein J	0.45	4.09e-07	2.46e-05	4.55e-05
Mphosph8	M-phase phosphoprotein 8	0.61	8.16e-05	0.00117	0.00216
Zmym5	zinc finger, MYM-type 5	0.63	4.11e-06	0.000138	0.000254
Zdhhc20	zinc finger, DHHC domain containing 20	0.6	6.05e-05	0.000926	0.00171
Extl3	exostoses (multiple)-like 3	1.5	0.00107	0.00725	0.0134
Trim35	tripartite motif-containing 35	1.51	1.55e-05	0.000349	0.000645
Stmn4	stathmin-like 4	1.64	3.37e-05	0.000612	0.00113
Pnma2	paraneoplastic antigen MA2	1.52	0.00207	0.0115	0.0213
Nefm	neurofilament, medium polypeptide	3.06	0.00315	0.0154	0.0286
Tnfrsf10b	tumor necrosis factor receptor superfamily, member 10b	0.63	0.00491	0.0207	0.0382
Lgi3	leucine-rich repeat LGI family, member 3	2.08	0.00854	0.03	0.0554
Dmtn	dematin actin binding protein	1.94	8.84e-07	4.34e-05	8.03e-05
Kctd4	potassium channel tetramerisation domain containing 4	0.56	0.000291	0.00289	0.00534
Naa16	N(alpha)-acetyltransferase 16, NatA auxiliary subunit	0.61	3.5e-06	0.000125	0.000231
Pcdh8	protocadherin 8	2.48	1.45e-05	0.000335	0.00062
Diap3	diaphanous homolog 3 (Drosophila)	0.58	0.00628	0.0246	0.0455
Scel	sciellin	0.28	4.04e-05	0.00069	0.00127
Gm17066	predicted gene 17066	0.61	1.18e-05	0.000294	0.000544
Mir17hg	Mir17 host gene 1 (non-protein coding)	0.54	0.00133	0.00847	0.0157
Nipbl	Nipped-B homolog (Drosophila)	0.64	1.61e-06	6.95e-05	0.000128
Spef2	sperm flagellar 2	0.56	0.00763	0.0278	0.0514
Prlr	prolactin receptor	0.43	1.74e-05	0.000375	0.000693
Rxfp3	relaxin family peptide receptor 3	2.38	0.00498	0.0208	0.0385
Npr3	natriuretic peptide receptor 3	0.55	5.18e-05	0.000824	0.00152
Ctnnd2	catenin (cadherin associated protein), delta 2	1.6	0.00265	0.0138	0.0255
Mtdh	metadherin	0.66	8.14e-06	0.000228	0.000422
Zfpm2	zinc finger protein, multitype 2	1.86	0.0014	0.00882	0.0163
Emc2	ER membrane protein complex subunit 2	0.66	0.000952	0.00663	0.0123
Phf20l1	PHD finger protein 20-like 1	0.63	0.000297	0.00293	0.00541
4930504C09Rik	RIKEN cDNA 4930504C09 gene	0.44	3.84e-05	0.000666	0.00123
Lynx1	Ly6/neurotoxin 1	1.92	0.000636	0.00509	0.00942
2010109I03Rik	RIKEN cDNA 2010109I03 gene	0.43	1.28e-05	0.000309	0.000572
Ly6e	lymphocyte antigen 6 complex, locus E	1.6	0.00807	0.0288	0.0533
Ly6h	lymphocyte antigen 6 complex, locus H	1.67	0.00391	0.0178	0.0328
Tigd5	tigger transposable element derived 5	1.52	0.00573	0.0231	0.0428
Oplah	5-oxoprolinase (ATP-hydrolysing)	1.63	0.000465	0.0041	0.00757
Kctd17	potassium channel tetramerisation domain containing 17	1.6	0.000104	0.0014	0.00258
Elfn2	leucine rich repeat and fibronectin type III, extracellular 2	1.75	7.72e-05	0.00112	0.00207
Cdc42ep1	CDC42 effector protein (Rho GTPase binding) 1	1.7	0.00641	0.0248	0.0459
Pdxp	pyridoxal (pyridoxine, vitamin B6) phosphatase	2.03	7.09e-08	6.42e-06	1.19e-05
Lgals1	lectin, galactose binding, soluble 1	0.65	0.00152	0.00926	0.0171
Tmem184b	transmembrane protein 184b	1.59	0.00221	0.0121	0.0223
Npcd	neuronal pentraxin chromo domain	2.39	2.72e-07	1.86e-05	3.44e-05
Cbx6	chromobox 6	1.66	1.97e-06	8.14e-05	0.00015
Mgat3	mannoside acetylglucosaminyltransferase 3	1.59	4.57e-05	0.000755	0.0014
L3mbtl2	l(3)mbt-like 2 (Drosophila)	1.61	6.19e-06	0.000188	0.000348
Chadl	chondroadherin-like	1.64	0.00402	0.0181	0.0334
Csdc2	cold shock domain containing C2, RNA binding	2.2	7.47e-06	0.000213	0.000394
Srebf2	sterol regulatory element binding factor 2	1.54	0.00155	0.00938	0.0173
Shisa8	expressed sequence AI848285	1.98	0.000116	0.0015	0.00277
Sept3	septin 3	2.11	9.44e-10	2.45e-07	4.53e-07
Tbrg3	transforming growth factor beta regulated gene 3	0.55	0.00248	0.0132	0.0244
Mpped1	metallophosphoesterase domain containing 1	4.75	0.00431	0.019	0.0351
Ldoc1l	leucine zipper, down-regulated in cancer 1-like	1.6	0.000271	0.00273	0.00505
Gramd4	GRAM domain containing 4	1.57	0.00265	0.0138	0.0255
Fam19a5	family with sequence similarity 19, member A5	1.63	2.6e-05	0.000492	0.00091
Panx2	pannexin 2	1.77	0.00621	0.0244	0.0451
Mapk8ip2	mitogen-activated protein kinase 8 interacting protein 2	1.7	2.72e-09	5.34e-07	9.86e-07
Arsa	arylsulfatase A	1.78	4.41e-05	0.000733	0.00136
Nell2	NEL-like 2	2.54	0.000313	0.00305	0.00565
E330033B04Rik	RIKEN cDNA E330033B04 gene	0.53	4.42e-05	0.000734	0.00136
Amigo2	adhesion molecule with Ig like domain 2	1.5	3.6e-06	0.000126	0.000234
Col2a1	collagen, type II, alpha 1	1.98	1.7e-05	0.000369	0.000681
Pfkm	phosphofructokinase, muscle	1.98	1.71e-10	6.57e-08	1.22e-07
Cacnb3	calcium channel, voltage-dependent, beta 3 subunit	1.9	0.000534	0.00452	0.00836
Arf3	ADP-ribosylation factor 3	1.54	7.93e-08	6.98e-06	1.29e-05
Tuba1c	tubulin, alpha 1C	2.38	1.54e-05	0.000349	0.000644
Asic1	acid-sensing (proton-gated) ion channel 1	2.05	4.5e-05	0.000746	0.00138
Spryd3	SPRY domain containing 3	1.51	9.7e-06	0.000256	0.000474
Sp1	trans-acting transcription factor 1	0.66	2.1e-06	8.6e-05	0.000159
Pde1b	phosphodiesterase 1B, Ca2+-calmodulin dependent	1.59	2.1e-05	0.000425	0.000786
Cdip1	cell death inducing Trp53 target 1	1.52	1.88e-05	0.000395	0.000731
Rbfox1	RNA binding protein, fox-1 homolog (C. elegans) 1	1.85	0.00234	0.0126	0.0233
Abat	4-aminobutyrate aminotransferase	1.69	0.000603	0.00488	0.00902
Rmi2	RMI2, RecQ mediated genome instability 2, homolog (S. cerevisiae)	0.49	0.00597	0.0239	0.0441
2610020C07Rik	RIKEN cDNA 2610020C07 gene	0.63	0.003	0.015	0.0276
2900011O08Rik	RIKEN cDNA 2900011O08 gene	2.39	0.000148	0.00178	0.00329
Snai2	snail homolog 2 (Drosophila)	0.44	0.000856	0.00625	0.0116
Fgd4	FYVE, RhoGEF and PH domain containing 4	0.61	0.00292	0.0147	0.0272
Ece2	endothelin converting enzyme 2	1.6	8.5e-05	0.0012	0.00223
Lpp	LIM domain containing preferred translocation partner in lipoma	0.59	2.25e-06	8.98e-05	0.000166
Fam43a	family with sequence similarity 43, member A	1.52	0.0031	0.0153	0.0283
Apod	apolipoprotein D	0.63	0.00943	0.0322	0.0595
Eaf2	ELL associated factor 2	0.48	0.00549	0.0225	0.0417
Polq	polymerase (DNA directed), theta	0.49	0.00139	0.00879	0.0163
Stxbp5l	syntaxin binding protein 5-like	0.61	5.33e-05	0.000841	0.00155
Gap43	growth associated protein 43	1.81	0.00308	0.0152	0.0282
2610015P09Rik	RIKEN cDNA 2610015P09 gene	0.58	2.32e-05	0.000453	0.000837
Phldb2	pleckstrin homology-like domain, family B, member 2	0.64	0.00505	0.021	0.0389
Gabrr3	gamma-aminobutyric acid (GABA) receptor, rho 3	0.66	0.00974	0.0329	0.0608
Stx19	syntaxin 19	0.48	0.000962	0.00669	0.0124
Mir99ahg	RIKEN cDNA 2810055G20 gene	0.61	0.0063	0.0246	0.0455
Usp16	ubiquitin specific peptidase 16	0.6	1.09e-06	5.01e-05	9.26e-05
Ripply3	ripply3 homolog (zebrafish)	0.58	0.00415	0.0185	0.0342
A630089N07Rik	RIKEN cDNA A630089N07 gene	0.48	1.4e-08	1.94e-06	3.58e-06
4930470H14Rik	RIKEN cDNA 4930470H14 gene	0.51	1.4e-05	0.000328	0.000607
Synj2	synaptojanin 2	1.6	0.00462	0.0198	0.0366
Gm16702	predicted gene, 16702	0.54	5.58e-05	0.000868	0.00161
Agpat4	1-acylglycerol-3-phosphate O-acyltransferase 4 (lysophosphatidic acid acyltransferase, delta)	1.52	0.00466	0.0199	0.0369
Zfp960	zinc finger protein 960	0.58	0.000349	0.0033	0.0061
Zfp97	zinc finger protein 97	0.63	0.00199	0.0112	0.0207
Ppp2r1a	protein phosphatase 2, regulatory subunit A, alpha	1.7	4.47e-06	0.000146	0.00027
Zfp677	zinc finger protein 677	0.54	0.00106	0.00718	0.0133
Zfp53	zinc finger protein 53	0.58	0.000157	0.00184	0.00341
Zfp52	zinc finger protein 52	0.47	0.000177	0.00201	0.00372
Zfp948	zinc finger protein 948	0.56	7.13e-06	0.000207	0.000383
Zfp760	zinc finger protein 760	0.59	0.000757	0.00576	0.0107
Zfp947	zinc finger protein 947	0.58	0.00329	0.0159	0.0294
Zfp944	zinc finger protein 944	0.65	0.00165	0.0098	0.0181
Zfp758	zinc finger protein 758	0.53	7.89e-07	3.97e-05	7.34e-05
Zfp946	zinc finger protein 946	0.62	0.00118	0.00775	0.0143
Zfp40	zinc finger protein 40	0.64	0.00654	0.0251	0.0465
Flywch1	FLYWCH-type zinc finger 1	1.63	4.78e-06	0.000155	0.000287
Atp6v0c-ps2	ATPase, H+ transporting, lysosomal V0 subunit C, pseudogene 2	1.56	3e-06	0.000112	0.000207
Syngr3	synaptogyrin 3	2.25	1.09e-06	5.01e-05	9.26e-05
Mapk8ip3	mitogen-activated protein kinase 8 interacting protein 3	1.6	0.00249	0.0132	0.0244
Cramp1l	Crm, cramped-like (Drosophila)	0.61	0.00214	0.0118	0.0218
Sox8	SRY (sex determining region Y)-box 8	1.51	0.00446	0.0194	0.0359
Fbxl16	F-box and leucine-rich repeat protein 16	1.66	9.55e-08	7.92e-06	1.47e-05
Arhgdig	Rho GDP dissociation inhibitor (GDI) gamma	1.73	0.00278	0.0142	0.0263
Pacsin1	protein kinase C and casein kinase substrate in neurons 1	1.75	1.17e-08	1.72e-06	3.17e-06
Cdkn1a	cyclin-dependent kinase inhibitor 1A (P21)	1.92	0.00103	0.00706	0.0131
Cpne5	copine V	1.85	0.00921	0.0317	0.0586
Gm6402	ribosomal protein S17 pseudogene	0.5	0.00106	0.0072	0.0133
Wdr4	WD repeat domain 4	1.56	2.7e-05	0.000507	0.000937
Zfp871	zinc finger protein 871	0.61	0.000789	0.00595	0.011
Zfp472	zinc finger protein 472	0.58	0.00017	0.00197	0.00364
Zfp763	zinc finger protein 763	0.63	8.38e-05	0.00119	0.0022
Zfp101	zinc finger protein 101	0.62	0.00299	0.015	0.0276
Vps52	vacuolar protein sorting 52 (yeast)	1.58	2.13e-05	0.000428	0.000791
Tap2	transporter 2, ATP-binding cassette, sub-family B (MDR/TAP)	1.73	0.00025	0.00258	0.00477
H2-Ab1	histocompatibility 2, class II antigen A, beta 1	2.04	7.69e-05	0.00112	0.00207
Vars	valyl-tRNA synthetase	1.58	0.000336	0.00322	0.00595
Atp6v1g2	ATPase, H+ transporting, lysosomal V1 subunit G2	1.91	0.000841	0.00619	0.0114
H2-Q1	histocompatibility 2, Q region locus 1	3.06	0.00441	0.0192	0.0356
H2-Q6	histocompatibility 2, Q region locus 6	23.06	9.99e-08	7.98e-06	1.47e-05
Ddr1	discoidin domain receptor family, member 1	1.78	1.55e-05	0.000349	0.000645
Gnl1	guanine nucleotide binding protein-like 1	1.73	9.44e-07	4.55e-05	8.42e-05
H2-T24	histocompatibility 2, T region locus 24	0.62	0.00648	0.025	0.0462
Cd2ap	CD2-associated protein	0.59	0.000513	0.00439	0.00812
Rcan2	regulator of calcineurin 2	1.74	0.00072	0.00558	0.0103
Tmem151b	transmembrane protein 151B	2.03	0.000951	0.00663	0.0123
Ttbk1	tau tubulin kinase 1	2.09	0.00387	0.0177	0.0326
Ccnd3	cyclin D3	1.53	0.000795	0.00597	0.011
Plcl2	phospholipase C-like 2	1.74	0.00835	0.0295	0.0546
Pot1b	protection of telomeres 1B	0.58	0.000569	0.00469	0.00867
Adgre4	EGF-like module containing, mucin-like, hormone receptor-like sequence 4	0.27	0.00177	0.0103	0.019
Zfp119a	zinc finger protein 119a	0.61	0.00627	0.0246	0.0454
Zfp959	zinc finger protein 959	0.63	0.000154	0.00182	0.00337
Fsd1	fibronectin type 3 and SPRY domain-containing protein	1.84	0.000223	0.00236	0.00436
Stap2	signal transducing adaptor family member 2	0.58	0.00606	0.024	0.0444
Mpnd	MPN domain containing	1.52	0.00108	0.00729	0.0135
Ticam1	toll-like receptor adaptor molecule 1	1.67	0.0076	0.0277	0.0513
Kdm4b	lysine (K)-specific demethylase 4B	1.76	0.000204	0.0022	0.00407
Ptprs	protein tyrosine phosphatase, receptor type, S	1.64	0.000172	0.00199	0.00367
Mllt1	myeloid/lymphoid or mixed-lineage leukemia (trithorax homolog, Drosophila); translocated to, 1	1.54	5.19e-05	0.000824	0.00152
Tnfsf9	tumor necrosis factor (ligand) superfamily, member 9	2.07	0.000232	0.00243	0.0045
C3	complement component 3	1.81	0.00252	0.0133	0.0246
Ankrd12	ankyrin repeat domain 12	0.57	5.89e-07	3.25e-05	6e-05
Myom1	myomesin 1	0.5	0.000183	0.00205	0.00378
Ehd3	EH-domain containing 3	1.68	5.06e-07	2.88e-05	5.32e-05
Eif2ak2	eukaryotic translation initiation factor 2-alpha kinase 2	0.63	0.000533	0.00452	0.00835
Tmem178	transmembrane protein 178	1.91	0.000322	0.0031	0.00574
Foxn2	forkhead box N2	0.66	0.00235	0.0126	0.0233
Adcyap1	adenylate cyclase activating polypeptide 1	4.75	7.44e-05	0.00109	0.00201
Gm20939	predicted gene, 20939	0.57	0.000748	0.00572	0.0106
Mpp7	membrane protein, palmitoylated 7 (MAGUK p55 subfamily member 7)	0.66	0.000141	0.00173	0.00319
Thoc1	THO complex 1	0.58	9e-05	0.00125	0.00232
Rock1	Rho-associated coiled-coil containing protein kinase 1	0.64	0.000469	0.00412	0.00761
Esco1	establishment of cohesion 1 homolog 1 (S. cerevisiae)	0.64	0.000535	0.00452	0.00836
Mapre2	microtubule-associated protein, RP/EB family, member 2	1.58	1.46e-08	1.96e-06	3.62e-06
Nme5	NME/NM23 family member 5	0.66	0.000293	0.0029	0.00537
Cdc25c	cell division cycle 25C	0.58	0.00719	0.0267	0.0493
Ecscr	endothelial cell surface expressed chemotaxis and apoptosis regulator	0.56	0.000199	0.00217	0.00401
Eif4ebp3	eukaryotic translation initiation factor 4E binding protein 3	0.61	0.0024	0.0128	0.0237
Pcdhac2	protocadherin alpha subfamily C, 2	1.69	7e-08	6.4e-06	1.18e-05
Pcdhgb1	protocadherin gamma subfamily B, 1	1.97	0.00202	0.0113	0.0209
Rell2	RELT-like 2	1.95	0.000224	0.00237	0.00438
Gm19466	predicted gene, 19466	0.5	0.00516	0.0214	0.0396
4930511M06Rik	RIKEN cDNA 4930511M06 gene	0.52	9.47e-05	0.0013	0.0024
Cd74	CD74 antigen (invariant polypeptide of major histocompatibility complex, class II antigen-associated)	1.69	0.00722	0.0268	0.0495
Tcof1	Treacher Collins Franceschetti syndrome 1, homolog	1.59	3.43e-05	0.000619	0.00114
Slc6a7	solute carrier family 6 (neurotransmitter transporter, L-proline), member 7	2.18	0.00923	0.0318	0.0587
Ablim3	actin binding LIM protein family, member 3	1.81	0.0014	0.00882	0.0163
Pmaip1	phorbol-12-myristate-13-acetate-induced protein 1	0.47	0.00129	0.00827	0.0153
Gnal	guanine nucleotide binding protein, alpha stimulating, olfactory type	1.57	0.000888	0.00638	0.0118
Cep192	centrosomal protein 192	0.53	6.01e-05	0.000921	0.0017
St8sia5	ST8 alpha-N-acetyl-neuraminide alpha-2,8-sialyltransferase 5	2.03	1.26e-05	0.000307	0.000568
Rttn	rotatin	0.63	0.00354	0.0166	0.0307
Gal	galanin	2.88	0.00338	0.0161	0.0298
Ankrd13d	ankyrin repeat domain 13 family, member D	1.69	0.000418	0.0038	0.00703
Pcx	pyruvate carboxylase	1.56	4.58e-06	0.000149	0.000276
Tmem151a	transmembrane protein 151A	2.29	1.99e-05	0.000411	0.00076
Cnih2	cornichon homolog 2 (Drosophila)	2.35	4.83e-07	2.84e-05	5.25e-05
Pacs1	phosphofurin acidic cluster sorting protein 1	1.71	2.63e-06	0.0001	0.000186
Malat1	metastasis associated lung adenocarcinoma transcript 1 (non-coding RNA)	0.48	2.82e-07	1.89e-05	3.5e-05
Frmd8	FERM domain containing 8	1.77	0.000356	0.00335	0.00619
Cdc42ep2	CDC42 effector protein (Rho GTPase binding) 2	2.04	0.00326	0.0158	0.0292
Ppp2r5b	protein phosphatase 2, regulatory subunit B', beta	1.59	2.49e-08	2.91e-06	5.38e-06
Men1	multiple endocrine neoplasia 1	1.52	8.74e-05	0.00123	0.00227
Nrxn2	neurexin II	2.03	6.04e-09	9.73e-07	1.8e-06
Rps6ka4	ribosomal protein S6 kinase, polypeptide 4	2.02	5.55e-11	4.06e-08	7.51e-08
Ccdc88b	coiled-coil domain containing 88B	2.16	0.000185	0.00205	0.0038
Plcb3	phospholipase C, beta 3	1.51	0.0017	0.01	0.0186
Rcor2	REST corepressor 2	2	3.85e-07	2.35e-05	4.34e-05
Atl3	atlastin GTPase 3	0.63	7.53e-05	0.0011	0.00203
Snhg1	small nucleolar RNA host gene 1	0.64	0.00309	0.0152	0.0282
B3gat3	beta-1,3-glucuronyltransferase 3 (glucuronosyltransferase I)	1.56	0.000132	0.00165	0.00306
Dagla	diacylglycerol lipase, alpha	1.79	0.00247	0.0131	0.0242
Dtx4	deltex 4 homolog (Drosophila)	1.69	2.81e-05	0.000521	0.000963
Cntf	ciliary neurotrophic factor	0.65	0.00337	0.0161	0.0297
Trpm3	transient receptor potential cation channel, subfamily M, member 3	0.59	2.73e-05	0.000512	0.000946
Smc5	structural maintenance of chromosomes 5	0.63	0.00228	0.0123	0.0228
Apba1	amyloid beta (A4) precursor protein binding, family A, member 1	1.51	0.00585	0.0234	0.0434
Rfx3	regulatory factor X, 3 (influences HLA class II expression)	0.59	0.00032	0.0031	0.00573
9930021J03Rik	RIKEN cDNA 9930021J03 gene	0.65	3.34e-05	0.000607	0.00112
Kif20b	kinesin family member 20B	0.34	1.42e-07	1.05e-05	1.94e-05
Slc35g1	solute carrier family 35, member G1	0.6	0.000412	0.00376	0.00694
Zfp518a	zinc finger protein 518A	0.64	0.00149	0.00921	0.017
Lcor	ligand dependent nuclear receptor corepressor	0.61	0.00111	0.0074	0.0137
Pgam1	phosphoglycerate mutase 1	1.89	1.67e-10	6.57e-08	1.22e-07
Golga7b	golgi autoantigen, golgin subfamily a, 7B	2.05	0.00103	0.00705	0.013
Crtac1	cartilage acidic protein 1	1.69	0.000938	0.00659	0.0122
Cnnm1	cyclin M1	1.97	2.49e-08	2.91e-06	5.38e-06
Chuk	conserved helix-loop-helix ubiquitous kinase	0.62	3.18e-06	0.000117	0.000216
Fam178a	family with sequence similarity 178, member A	0.63	0.00181	0.0105	0.0193
Kcnip2	Kv channel-interacting protein 2	1.87	7.25e-05	0.00107	0.00198
Ina	internexin neuronal intermediate filament protein, alpha	2.43	1.1e-05	0.000284	0.000526
Bbip1	BBSome interacting protein 1	0.62	4.85e-05	0.000788	0.00146
Afap1l2	actin filament associated protein 1-like 2	1.87	0.00314	0.0154	0.0285
Zfp950	zinc finger prtoein 950	0.55	8.51e-06	0.000237	0.000438
Gm7102	predicted gene 7102	0.62	0.000152	0.0018	0.00334
Kin	antigenic determinant of rec-A protein	0.65	0.00504	0.021	0.0388
Etl4	enhancer trap locus 4	0.66	0.00835	0.0295	0.0546
Yme1l1	YME1-like 1 (S. cerevisiae)	0.66	6.27e-05	0.000951	0.00176
Rnf208	ring finger protein 208	1.61	0.00896	0.0311	0.0576
Grin1	glutamate receptor, ionotropic, NMDA1 (zeta 1)	1.78	0.000305	0.00299	0.00552
Npdc1	neural proliferation, differentiation and control 1	1.51	7.35e-06	0.000211	0.000391
Lhx3	LIM homeobox protein 3	1.72	0.00355	0.0166	0.0308
Fam69b	family with sequence similarity 69, member B	1.83	0.00015	0.0018	0.00333
Adamts13	a disintegrin-like and metallopeptidase (reprolysin type) with thrombospondin type 1 motif, 13	0.55	0.000379	0.0035	0.00646
Slc2a6	solute carrier family 2 (facilitated glucose transporter), member 6	2.46	0.0018	0.0104	0.0193
Olfm1	olfactomedin 1	1.66	0.000131	0.00165	0.00305
Cstad	CSA-conditional, T cell activation-dependent protein	0.44	0.00774	0.0281	0.0519
Usp20	ubiquitin specific peptidase 20	1.63	2.32e-06	9.17e-05	0.000169
Ncs1	neuronal calcium sensor 1	1.74	0.00195	0.0111	0.0205
Fibcd1	fibrinogen C domain containing 1	1.84	0.00261	0.0136	0.0252
Ppapdc3	phosphatidic acid phosphatase type 2 domain containing 3	1.53	0.0024	0.0128	0.0237
Dnm1	dynamin 1	1.54	6.15e-05	0.000936	0.00173
St6galnac4	ST6 (alpha-N-acetyl-neuraminyl-2,3-beta-galactosyl-1,3)-N-acetylgalactosaminide alpha-2,6-sialyltransferase 4	1.55	0.000439	0.00394	0.00728
St6galnac6	ST6 (alpha-N-acetyl-neuraminyl-2,3-beta-galactosyl-1,3)-N-acetylgalactosaminide alpha-2,6-sialyltransferase 6	1.74	0.00055	0.00459	0.00849
Stxbp1	syntaxin binding protein 1	1.6	3.7e-06	0.000129	0.000238
Lrsam1	leucine rich repeat and sterile alpha motif containing 1	1.55	0.000279	0.0028	0.00518
Garnl3	GTPase activating RANGAP domain-like 3	1.86	0.00234	0.0126	0.0232
Zbtb6	zinc finger and BTB domain containing 6	0.63	0.000364	0.00339	0.00628
Gm16523	mitochondrial ribosomal protein L40 pseudogene	0.6	0.000541	0.00455	0.00841
Orc4	origin recognition complex, subunit 4	0.66	0.00137	0.00866	0.016
Kif5c	kinesin family member 5C	1.56	0.00282	0.0144	0.0265
Gm13483	predicted gene 13483	0.38	0.00273	0.014	0.026
Prpf40a	PRP40 pre-mRNA processing factor 40 homolog A (yeast)	0.65	0.000155	0.00183	0.00338
Rprm	reprimo, TP53 dependent G2 arrest mediator candidate	2.51	2.27e-05	0.000449	0.00083
Dpp4	dipeptidylpeptidase 4	0.62	0.00162	0.00969	0.0179
Fap	fibroblast activation protein	0.61	0.000643	0.00514	0.00951
Grb14	growth factor receptor bound protein 14	1.8	0.0016	0.00966	0.0179
Nostrin	nitric oxide synthase trafficker	0.41	0.00128	0.00823	0.0152
Ccdc173	coiled-coil domain containing 173	0.48	4.18e-09	7.16e-07	1.32e-06
Ssb	Sjogren syndrome antigen B	0.64	0.000868	0.00631	0.0117
Gad1	glutamate decarboxylase 1	2.87	1.42e-06	6.26e-05	0.000116
Dcaf17	DDB1 and CUL4 associated factor 17	0.66	0.00146	0.00907	0.0168
Ttn	titin	0.6	0.000596	0.00484	0.00895
A330069E16Rik	RIKEN cDNA A330069E16 gene	0.58	0.0042	0.0187	0.0345
Arhgap1	Rho GTPase activating protein 1	1.53	4.22e-06	0.000139	0.000257
Mapk8ip1	mitogen-activated protein kinase 8 interacting protein 1	1.69	0.000905	0.00644	0.0119
Cry2	cryptochrome 2 (photolyase-like)	1.57	0.000775	0.00589	0.0109
Chst1	carbohydrate (keratan sulfate Gal-6) sulfotransferase 1	1.85	3.83e-06	0.000131	0.000242
Syt13	synaptotagmin XIII	2.47	6.09e-07	3.27e-05	6.04e-05
Trp53i11	transformation related protein 53 inducible protein 11	1.76	0.000246	0.00256	0.00472
Fjx1	four jointed box 1 (Drosophila)	2.1	0.000381	0.00351	0.00649
Cstf3	cleavage stimulation factor, 3' pre-RNA, subunit 3	0.63	2.01e-05	0.000414	0.000765
Ccdc73	coiled-coil domain containing 73	0.58	0.00151	0.00925	0.0171
Lpcat4	lysophosphatidylcholine acyltransferase 4	2.06	3.93e-07	2.38e-05	4.4e-05
A530058N18Rik	RIKEN cDNA A530058N18 gene	0.59	2.18e-06	8.82e-05	0.000163
BC052040	cDNA sequence BC052040	1.89	0.000134	0.00167	0.00309
Disp2	dispatched homolog 2 (Drosophila)	1.82	5.17e-05	0.000824	0.00152
Itpka	inositol 1,4,5-trisphosphate 3-kinase A	4.19	0.00469	0.02	0.037
Map1a	microtubule-associated protein 1 A	2.21	6.5e-08	6.16e-06	1.14e-05
Mfap1b	microfibrillar-associated protein 1B	0.64	0.000202	0.00219	0.00405
Trpm7	transient receptor potential cation channel, subfamily M, member 7	0.65	0.00259	0.0135	0.025
Kcnip3	Kv channel interacting protein 3, calsenilin	1.77	0.00072	0.00558	0.0103
Gm14005	predicted gene 14005	0.54	0.00232	0.0125	0.0231
A730017L22Rik	RIKEN cDNA A730017L22 gene	0.57	1.14e-06	5.16e-05	9.55e-05
Gfra4	glial cell line derived neurotrophic factor family receptor alpha 4	1.88	0.000214	0.00229	0.00422
Slc24a3	solute carrier family 24 (sodium/potassium/calcium exchanger), member 3	1.86	8.77e-05	0.00123	0.00227
Zfp120	zinc finger protein 120	0.64	0.000659	0.00521	0.00962
Zfp937	zinc finger protein 937	0.66	0.00632	0.0246	0.0455
Zfp442	zinc finger protein 442	0.62	0.00629	0.0246	0.0455
Vsx1	visual system homeobox 1 homolog (zebrafish)	1.57	0.000444	0.00397	0.00733
Scrt2	scratch homolog 2, zinc finger protein (Drosophila)	2.5	3.99e-05	0.00069	0.00127
Srxn1	sulfiredoxin 1 homolog (S. cerevisiae)	1.58	0.000125	0.0016	0.00296
Nrsn2	neurensin 2	2.66	4.91e-05	0.000794	0.00147
Tspyl3	TSPY-like 3	1.91	0.00159	0.00962	0.0178
2500004C02Rik	RIKEN cDNA 2500004C02 gene	0.62	0.000453	0.00403	0.00745
Necab3	N-terminal EF-hand calcium binding protein 3	2.01	1.29e-05	0.00031	0.000573
E2f1	E2F transcription factor 1	1.8	0.00621	0.0244	0.0451
Ahcy	S-adenosylhomocysteine hydrolase	1.66	0.00383	0.0176	0.0325
Ggt7	gamma-glutamyltransferase 7	1.58	0.000586	0.00478	0.00884
Mmp24	matrix metallopeptidase 24	2.11	4.1e-11	4.06e-08	7.51e-08
Rbm39	RNA binding motif protein 39	0.63	5.56e-07	3.11e-05	5.75e-05
Src	Rous sarcoma oncogene	1.54	0.000567	0.00468	0.00865
Nnat	neuronatin	1.7	0.000649	0.00516	0.00953
Tox2	TOX high mobility group box family member 2	1.89	0.00135	0.00859	0.0159
Gdap1l1	ganglioside-induced differentiation-associated protein 1-like 1	1.66	2.42e-05	0.000468	0.000865
Mmp9	matrix metallopeptidase 9	3.29	4.67e-12	9.4e-09	1.74e-08
Cdh22	cadherin 22	2.34	3.39e-06	0.000122	0.000226
Elmo2	engulfment and cell motility 2	1.62	2.85e-07	1.9e-05	3.51e-05
Sulf2	sulfatase 2	1.91	1e-12	2.69e-09	4.97e-09
Prex1	phosphatidylinositol-3,4,5-trisphosphate-dependent Rac exchange factor 1	1.62	0.00309	0.0152	0.0282
Znfx1	zinc finger, NFX1-type containing 1	1.64	1.38e-05	0.000325	0.000601
B4galt5	UDP-Gal:betaGlcNAc beta 1,4-galactosyltransferase, polypeptide 5	1.83	4.19e-05	0.000709	0.00131
Spata2	spermatogenesis associated 2	1.51	0.000485	0.00421	0.00778
Ube2v1	ubiquitin-conjugating enzyme E2 variant 1	1.6	2.81e-05	0.000521	0.000963
Atp9a	ATPase, class II, type 9A	1.82	2.14e-09	4.53e-07	8.38e-07
Tfap2c	transcription factor AP-2, gamma	2.5	5.31e-05	0.00084	0.00155
0610010B08Rik	RIKEN cDNA 0610010B08 gene	0.51	0.000175	0.002	0.0037
Gm6710	predicted gene 6710	0.59	0.00115	0.00761	0.0141
Gm14440	predicted gene 14440	0.63	0.000156	0.00183	0.00339
Gm14431	predicted gene 14431	0.61	0.00691	0.026	0.0481
Gm8898	predicted gene 8898	0.61	0.00691	0.026	0.0481
Gm14296	predicted gene 14296	0.66	0.000438	0.00394	0.00728
Gm6182	zinc finger protein 845-like	0.66	0.00037	0.00343	0.00634
Gm14405	predicted gene 14405	0.38	0.00069	0.00538	0.00995
Gm14420	predicted gene 14420	0.63	0.00171	0.0101	0.0186
Gm14403	predicted gene 14403	0.59	0.000318	0.00309	0.00572
Gm14322	predicted gene 14322	0.47	7.44e-07	3.77e-05	6.96e-05
Gm14325	predicted gene 14325	0.52	2.49e-07	1.71e-05	3.17e-05
Gm14327	predicted gene 14327	0.53	0.00312	0.0154	0.0284
Gm14326	predicted gene 14326	0.61	0.000119	0.00153	0.00283
Etohi1	ethanol induced 1	0.63	7.02e-05	0.00104	0.00193
Fam217b	family with sequence similarity 217, member B	2.27	0.000216	0.0023	0.00426
Cdh4	cadherin 4	1.52	0.000648	0.00516	0.00953
Hrh3	histamine receptor H3	1.75	0.000655	0.00519	0.0096
Bhlhe23	basic helix-loop-helix family, member e23	1.54	0.000194	0.00213	0.00393
Chrna4	cholinergic receptor, nicotinic, alpha polypeptide 4	2.08	6.54e-05	0.000979	0.00181
Fabp12	fatty acid binding protein 12	0.61	0.000254	0.0026	0.0048
Lrrcc1	leucine rich repeat and coiled-coil domain containing 1	0.62	6.16e-06	0.000188	0.000347
Crh	corticotropin releasing hormone	21.83	0.000117	0.00151	0.00279
Tnfsf10	tumor necrosis factor (ligand) superfamily, member 10	0.63	0.00905	0.0313	0.0579
4930419G24Rik	RIKEN cDNA 4930419G24 gene	0.56	0.00233	0.0125	0.0231
Ttc14	tetratricopeptide repeat domain 14	0.6	0.00024	0.00252	0.00465
Ccna2	cyclin A2	0.61	1.49e-05	0.000343	0.000634
Spry1	sprouty homolog 1 (Drosophila)	1.53	0.00219	0.012	0.0222
Plk4	polo-like kinase 4	0.57	0.00451	0.0195	0.036
Sclt1	sodium channel and clathrin linker 1	0.66	0.00313	0.0154	0.0285
D3Ertd751e	DNA segment, Chr 3, ERATO Doi 751, expressed	0.63	0.00362	0.0169	0.0312
Lhfp	lipoma HMGIC fusion partner	1.62	0.00149	0.00921	0.017
Postn	periostin, osteoblast specific factor	0.5	0.000791	0.00596	0.011
Rfxap	regulatory factor X-associated protein	1.58	5.76e-05	0.000892	0.00165
Selt	selenoprotein T	0.65	0.00167	0.00992	0.0183
F630111L10Rik	RIKEN cDNA F630111L10 gene	0.55	9.08e-05	0.00126	0.00233
Lekr1	leucine, glutamate and lysine rich 1	0.65	0.00486	0.0205	0.0379
Ccnl1	cyclin L1	0.63	0.00106	0.0072	0.0133
Smc4	structural maintenance of chromosomes 4	0.53	1.87e-06	7.82e-05	0.000145
Ppm1l	protein phosphatase 1 (formerly 2C)-like	1.74	1.09e-06	5.01e-05	9.26e-05
Bche	butyrylcholinesterase	0.56	0.00465	0.0199	0.0368
Fam198b	family with sequence similarity 198, member B	0.54	0.00661	0.0253	0.0467
Gm6525	ribosomal protein L36a pseudogene	0.48	0.00431	0.019	0.0351
Mab21l2	mab-21-like 2 (C. elegans)	1.54	0.00142	0.00891	0.0165
Syt11	synaptotagmin XI	1.56	3.78e-05	0.000661	0.00122
Rusc1	RUN and SH3 domain containing 1	2.4	7.15e-06	0.000207	0.000383
Trim46	tripartite motif-containing 46	1.7	0.000272	0.00274	0.00506
Adar	adenosine deaminase, RNA-specific	1.66	2.4e-06	9.42e-05	0.000174
Chrnb2	cholinergic receptor, nicotinic, beta polypeptide 2 (neuronal)	1.61	0.00226	0.0122	0.0226
1700094D03Rik	RIKEN cDNA 1700094D03 gene	0.55	4.96e-06	0.000159	0.000294
Slc27a3	solute carrier family 27 (fatty acid transporter), member 3	1.71	0.000455	0.00404	0.00747
Ciart	circadian associated repressor of transcription	1.51	0.00949	0.0323	0.0597
Sf3b4	splicing factor 3b, subunit 4	1.55	1.28e-05	0.000309	0.000572
Sv2a	synaptic vesicle glycoprotein 2 a	1.94	1.06e-09	2.66e-07	4.91e-07
Ankrd34a	ankyrin repeat domain 34A	1.92	0.0013	0.00834	0.0154
Syt6	synaptotagmin VI	2.01	0.00473	0.0201	0.0372
Atg4a	autophagy related 4A, cysteine peptidase	0.66	0.000549	0.00459	0.00849
Slc16a4	solute carrier family 16 (monocarboxylic acid transporters), member 4	0.55	0.000153	0.00182	0.00337
Kcnc4	potassium voltage gated channel, Shaw-related subfamily, member 4	2.36	0.000115	0.00149	0.00276
Amigo1	adhesion molecule with Ig like domain 1	1.59	4.11e-06	0.000138	0.000254
Prpf38b	PRP38 pre-mRNA processing factor 38 (yeast) domain containing B	0.65	0.000202	0.00219	0.00405
Amy1	amylase 1, salivary	0.49	2.72e-08	3.13e-06	5.79e-06
Rnpc3	RNA-binding region (RNP1, RRM) containing 3	0.57	2.97e-05	0.000547	0.00101
Gpr88	G-protein coupled receptor 88	3.03	1.38e-05	0.000325	0.000601
Lrrc39	leucine rich repeat containing 39	0.51	0.00149	0.00923	0.0171
6530403H02Rik	RIKEN cDNA 6530403H02 gene	0.51	7.74e-06	0.000219	0.000404
Arhgap29	Rho GTPase activating protein 29	0.59	0.00018	0.00203	0.00375
Pde5a	phosphodiesterase 5A, cGMP-specific	0.64	0.000197	0.00216	0.00399
Neurog2	neurogenin 2	1.92	0.00975	0.0329	0.0608
Cenpe	centromere protein E	0.48	8.83e-06	0.000242	0.000448
Bdh2	3-hydroxybutyrate dehydrogenase, type 2	0.62	0.00111	0.00741	0.0137
Slc39a8	solute carrier family 39 (metal ion transporter), member 8	0.51	0.000257	0.00263	0.00485
Emcn	endomucin	0.36	1.12e-06	5.12e-05	9.47e-05
Rap1gds1	RAP1, GTP-GDP dissociation stimulator 1	1.57	3.67e-07	2.32e-05	4.29e-05
Ddah1	dimethylarginine dimethylaminohydrolase 1	1.59	0.000155	0.00183	0.00338
Spata1	spermatogenesis associated 1	0.55	9.66e-06	0.000256	0.000474
Gng5	guanine nucleotide binding protein (G protein), gamma 5	0.66	0.00136	0.00865	0.016
Nexn	nexilin	0.55	0.00375	0.0173	0.032
Ak5	adenylate kinase 5	2.13	2.69e-06	0.000102	0.000189
4930570G19Rik	RIKEN cDNA 4930570G19 gene	0.64	0.000554	0.00461	0.00852
Rpe65	retinal pigment epithelium 65	0.67	0.00565	0.0229	0.0423
Plag1	pleiomorphic adenoma gene 1	0.6	0.000106	0.00141	0.0026
Fam110b	family with sequence similarity 110, member B	1.81	0.000205	0.0022	0.00408
Gdf6	growth differentiation factor 6	2.89	0.00707	0.0264	0.0489
Rad54b	RAD54 homolog B (S. cerevisiae)	0.57	0.000164	0.0019	0.00352
Fsbp	fibrinogen silencer binding protein	0.56	8.32e-08	7.05e-06	1.3e-05
Rbm12b2	RNA binding motif protein 12 B2	0.66	4.22e-05	0.00071	0.00131
Slc26a7	solute carrier family 26, member 7	0.55	0.00332	0.016	0.0296
Cngb3	cyclic nucleotide gated channel beta 3	0.59	1.6e-05	0.000355	0.000656
Rmdn1	regulator of microtubule dynamics 1	0.65	8.77e-05	0.00123	0.00227
Prdm13	PR domain containing 13	2.32	0.000178	0.00202	0.00373
Pnisr	serine/arginine-rich splicing factor 18	0.59	6.12e-05	0.000935	0.00173
Casp8ap2	caspase 8 associated protein 2	0.65	0.00296	0.0148	0.0274
Gm6297	predicted gene 6297	0.65	0.00344	0.0164	0.0302
Cntfr	ciliary neurotrophic factor receptor	1.99	0.00114	0.00757	0.014
Phf24	expressed sequence N28178	1.61	0.00655	0.0252	0.0466
Rusc2	RUN and SH3 domain containing 2	1.91	9.91e-08	7.98e-06	1.47e-05
Zcchc7	zinc finger, CCHC domain containing 7	0.6	5.96e-06	0.000184	0.00034
Fbxo10	F-box protein 10	1.7	0.000187	0.00207	0.00383
Aldh1b1	aldehyde dehydrogenase 1 family, member B1	3.07	0.00168	0.00996	0.0184
Ccdc180	RIKEN cDNA E230008N13 gene	0.57	0.00896	0.0311	0.0576
Gabbr2	gamma-aminobutyric acid (GABA) B receptor, 2	2.31	4.85e-08	4.82e-06	8.91e-06
Alg2	asparagine-linked glycosylation 2 (alpha-1,3-mannosyltransferase)	1.5	3.65e-05	0.000649	0.0012
Smc2	structural maintenance of chromosomes 2	0.57	0.00161	0.00967	0.0179
Fsd1l	fibronectin type III and SPRY domain containing 1-like	0.66	0.00737	0.0271	0.0501
Ctnnal1	catenin (cadherin associated protein), alpha-like 1	0.67	9.34e-06	0.000252	0.000465
Zfp37	zinc finger protein 37	0.58	0.000231	0.00243	0.00449
Tnc	tenascin C	1.66	0.00254	0.0134	0.0247
Trim32	tripartite motif-containing 32	1.6	0.00114	0.00757	0.014
Tlr4	toll-like receptor 4	0.46	0.00506	0.0211	0.039
Brinp1	bone morphogenic protein/retinoic acid inducible neural specific 1	2.57	1.08e-05	0.000279	0.000516
Tyrp1	tyrosinase-related protein 1	0.6	0.00221	0.0121	0.0223
Cntln	centlein, centrosomal protein	0.66	0.00123	0.00798	0.0147
Ift74	intraflagellar transport 74	0.61	0.000248	0.00257	0.00475
Mysm1	myb-like, SWIRM and MPN domains 1	0.61	0.000467	0.0041	0.00759
Hook1	hook homolog 1 (Drosophila)	0.64	0.000563	0.00466	0.00861
Itgb3bp	integrin beta 3 binding protein (beta3-endonexin)	0.58	0.000445	0.00397	0.00734
Pgm2	phosphoglucomutase 2	1.61	5.97e-06	0.000184	0.00034
Ak4	adenylate kinase 4	1.7	0.0011	0.00735	0.0136
Ppap2b	phosphatidic acid phosphatase type 2B	1.54	0.00491	0.0207	0.0382
Pcsk9	proprotein convertase subtilisin/kexin type 9	2.22	0.000942	0.00659	0.0122
Orc1	origin recognition complex, subunit 1	0.48	0.00779	0.0281	0.052
Nasp	nuclear autoantigenic sperm protein (histone-binding)	0.65	0.000182	0.00204	0.00378
B4galt2	UDP-Gal:betaGlcNAc beta 1,4- galactosyltransferase, polypeptide 2	1.57	5.94e-05	0.000913	0.00169
St3gal3	ST3 beta-galactoside alpha-2,3-sialyltransferase 3	1.66	2.24e-05	0.000446	0.000825
Ptprf	protein tyrosine phosphatase, receptor type, F	1.68	0.000189	0.00209	0.00386
Rimkla	ribosomal modification protein rimK-like family member A	1.97	1.94e-05	0.000404	0.000747
Foxo6	forkhead box O6	2.38	0.00674	0.0256	0.0473
Rims3	regulating synaptic membrane exocytosis 3	2.07	0.00829	0.0294	0.0544
Hpcal4	hippocalcin-like 4	1.93	0.000526	0.00447	0.00826
D830031N03Rik	RIKEN cDNA D830031N03 gene	0.59	0.00789	0.0284	0.0524
Map7d1	MAP7 domain containing 1	1.7	5.95e-06	0.000184	0.00034
5730409E04Rik	RIKEN cDNA 5730409E04Rik gene	1.73	0.000897	0.00641	0.0118
Ncdn	neurochondrin	2.28	6.51e-09	1.03e-06	1.9e-06
Trim62	tripartite motif-containing 62	2.16	2.27e-05	0.000449	0.00083
Hpca	hippocalcin	1.91	0.00987	0.0332	0.0615
Yars	tyrosyl-tRNA synthetase	1.53	6.4e-07	3.37e-05	6.23e-05
Sdc3	syndecan 3	1.52	0.000747	0.00571	0.0106
Sesn2	sestrin 2	2.13	1.37e-05	0.000325	0.000601
Zdhhc18	zinc finger, DHHC domain containing 18	1.56	0.000271	0.00273	0.00505
Sepn1	selenoprotein N, 1	1.54	0.000831	0.00612	0.0113
Clic4	chloride intracellular channel 4 (mitochondrial)	1.78	2.52e-05	0.00048	0.000886
Rcan3	regulator of calcineurin 3	1.53	0.000364	0.00339	0.00627
Lypla2	lysophospholipase 2	1.59	2.83e-05	0.000523	0.000967
Htr1d	5-hydroxytryptamine (serotonin) receptor 1D	2.06	0.008	0.0287	0.053
Epha8	Eph receptor A8	2.13	3.32e-08	3.47e-06	6.42e-06
Rap1gap	Rap1 GTPase-activating protein	1.86	1.82e-05	0.00039	0.00072
Ece1	endothelin converting enzyme 1	1.57	0.00119	0.00781	0.0144
Fam43b	family with sequence similarity 43, member B	2.73	4.42e-07	2.63e-05	4.87e-05
Rcc2	regulator of chromosome condensation 2	1.55	0.000342	0.00325	0.00601
Kazn	kazrin, periplakin interacting protein	1.58	1.85e-05	0.000394	0.000729
Gm13139	predicted gene 13139	0.6	7.74e-05	0.00112	0.00207
Znf41-ps	ZNF41, pseudogene	0.53	0.000173	0.00199	0.00367
Gm13251	predicted gene 13251	0.54	5.33e-05	0.000841	0.00155
Gm13152	predicted gene 13152	0.6	0.000461	0.00407	0.00753
Rps19-ps3	ribosomal protein S19, pseudogene 3	0.51	0.00344	0.0164	0.0302
Mfn2	mitofusin 2	1.58	6.37e-06	0.000191	0.000354
Plod1	procollagen-lysine, 2-oxoglutarate 5-dioxygenase 1	1.57	0.000151	0.0018	0.00334
Clcn6	chloride channel 6	1.62	0.000382	0.00351	0.00649
Ptchd2	patched domain containing 2	1.76	2.07e-05	0.000423	0.000781
Clstn1	calsyntenin 1	1.51	0.00119	0.00779	0.0144
Eno1	enolase 1, alpha non-neuron	1.69	0.00125	0.0081	0.015
Slc45a1	solute carrier family 45, member 1	1.81	0.00474	0.0202	0.0373
Espn	espin	1.6	0.00409	0.0183	0.0338
Acot7	acyl-CoA thioesterase 7	1.9	0.000849	0.00622	0.0115
Gpr153	G protein-coupled receptor 153	1.97	1.88e-05	0.000396	0.000731
Kcnab2	potassium voltage-gated channel, shaker-related subfamily, beta member 2	1.71	3.54e-08	3.61e-06	6.67e-06
Ajap1	adherens junction associated protein 1	2.08	7.09e-05	0.00105	0.00194
Prkcz	protein kinase C, zeta	1.5	8.75e-05	0.00123	0.00227
Gabrd	gamma-aminobutyric acid (GABA) A receptor, subunit delta	2	0.000444	0.00397	0.00733
Cptp	glycolipid transfer protein domain containing 1	1.58	6.67e-05	0.000995	0.00184
Acap3	ArfGAP with coiled-coil, ankyrin repeat and PH domains 3	1.7	2.62e-06	0.0001	0.000186
Fam133b	family with sequence similarity 133, member B	0.63	4.71e-05	0.000768	0.00142
Mterf1a	mitochondrial transcription termination factor 1a	0.65	0.00949	0.0323	0.0597
4921511H03Rik	RIKEN cDNA 4921511H03 gene	0.56	0.00275	0.0141	0.0261
9330182L06Rik	RIKEN cDNA 9330182L06 gene	1.57	0.00092	0.00652	0.012
Rsbn1l	round spermatid basic protein 1-like	0.64	0.00044	0.00394	0.00729
A930003O13Rik	RIKEN cDNA A930003O13 gene	0.55	0.00236	0.0126	0.0233
2700038G22Rik	RIKEN cDNA 2700038G22 gene	0.59	0.00667	0.0254	0.047
Kcnh2	potassium voltage-gated channel, subfamily H (eag-related), member 2	1.69	0.00359	0.0168	0.031
Agap3	ArfGAP with GTPase domain, ankyrin repeat and PH domain 3	1.53	0.0001	0.00136	0.00251
4831440E17Rik	RIKEN cDNA 4831440E17 gene	0.63	0.000173	0.00199	0.00367
Dpp6	dipeptidylpeptidase 6	2.14	7.36e-07	3.75e-05	6.94e-05
Tyms	thymidylate synthase	0.6	1.36e-07	1.02e-05	1.89e-05
Gareml	GRB2 associated, regulator of MAPK1-like	2.27	0.00967	0.0327	0.0604
Dpysl5	dihydropyrimidinase-like 5	2.26	2.8e-09	5.37e-07	9.92e-07
Cad	carbamoyl-phosphate synthetase 2, aspartate transcarbamylase, and dihydroorotase	1.64	0.00344	0.0164	0.0302
Slc30a3	solute carrier family 30 (zinc transporter), member 3	2.94	0.000135	0.00168	0.0031
Gckr	glucokinase regulatory protein	0.62	0.00572	0.0231	0.0427
Uvssa	UV stimulated scaffold protein A	0.64	0.00312	0.0154	0.0284
Nat8l	N-acetyltransferase 8-like	1.74	0.00266	0.0138	0.0255
Grk4	G protein-coupled receptor kinase 4	0.51	8.63e-07	4.26e-05	7.88e-05
Rgs12	regulator of G-protein signaling 12	1.73	2.38e-07	1.65e-05	3.06e-05
Ablim2	actin-binding LIM protein 2	1.73	0.0015	0.00925	0.0171
Sorcs2	sortilin-related VPS10 domain containing receptor 2	1.89	5.05e-05	0.000813	0.0015
Crmp1	collapsin response mediator protein 1	2.49	1.04e-10	5.57e-08	1.03e-07
Stk32b	serine/threonine kinase 32B	2.25	0.00714	0.0266	0.0492
Nsg1	neuron specific gene family member 1	2.06	0.00147	0.00913	0.0169
4930431F12Rik	RIKEN cDNA 4930431F12 gene	0.6	0.00298	0.0149	0.0276
Lcorl	ligand dependent nuclear receptor corepressor-like	0.65	0.00563	0.0228	0.0422
5730480H06Rik	RIKEN cDNA 5730480H06 gene	0.57	0.00451	0.0195	0.036
9230114K14Rik	RIKEN cDNA 9230114K14 gene	0.66	0.00572	0.0231	0.0427
Sel1l3	sel-1 suppressor of lin-12-like 3 (C. elegans)	2.08	3.76e-05	0.00066	0.00122
C330024D21Rik	RIKEN cDNA C330024D21 gene	0.56	0.00639	0.0248	0.0459
Guf1	GUF1 GTPase homolog (S. cerevisiae)	0.63	6.79e-07	3.55e-05	6.56e-05
Cnga1	cyclic nucleotide gated channel alpha 1	0.57	1.5e-06	6.52e-05	0.000121
Slc10a4	solute carrier family 10 (sodium/bile acid cotransporter family), member 4	3.06	0.000328	0.00316	0.00584
Kit	kit oncogene	1.52	0.000184	0.00205	0.00379
Kdr	kinase insert domain protein receptor	1.89	4.15e-06	0.000138	0.000255
Cnot6l	CCR4-NOT transcription complex, subunit 6-like	0.63	5.82e-06	0.000181	0.000336
Rasgef1b	RasGEF domain family, member 1B	1.64	1.26e-05	0.000306	0.000566
BC005561	cDNA sequence BC005561	0.57	6.32e-06	0.000191	0.000352
D930016D06Rik	RIKEN cDNA D930016D06 gene	0.55	5.17e-05	0.000824	0.00152
Hfm1	HFM1, ATP-dependent DNA helicase homolog (S. cerevisiae)	0.54	0.000173	0.00199	0.00367
Mtf2	metal response element binding transcription factor 2	0.66	0.000112	0.00147	0.00271
Tmed5	transmembrane emp24 protein transport domain containing 5	0.62	0.000373	0.00345	0.00638
Gm15446	predicted gene 15446	0.45	1.74e-05	0.000375	0.000693
Zfp932	zinc finger protein 932	0.53	1.59e-05	0.000354	0.000654
Plcxd1	phosphatidylinositol-specific phospholipase C, X domain containing 1	2.09	2.32e-05	0.000453	0.000837
Zfp605	zinc finger protein 605	0.62	7.43e-06	0.000213	0.000394
Galnt9	UDP-N-acetyl-alpha-D-galactosamine:polypeptide N-acetylgalactosaminyltransferase 9	2.72	2.52e-09	5.06e-07	9.36e-07
Pus1	pseudouridine synthase 1	1.66	0.000519	0.00442	0.00817
Sez6l	seizure related 6 homolog like	1.92	0.000147	0.00178	0.00329
Sgsm1	small G protein signaling modulator 1	1.85	6.4e-06	0.000192	0.000354
Coro1c	coronin, actin binding protein 1C	1.68	9.01e-11	5.18e-08	9.58e-08
Ube3b	ubiquitin protein ligase E3B	1.61	0.000174	0.00199	0.00369
Oasl2	2'-5' oligoadenylate synthetase-like 2	1.72	4.38e-06	0.000144	0.000266
Fbxo21	F-box protein 21	1.67	3.36e-08	3.47e-06	6.42e-06
Tbx3	T-box 3	2.28	1.14e-08	1.7e-06	3.14e-06
Rbm19	RNA binding motif protein 19	1.57	0.00307	0.0152	0.0282
Ddx54	DEAD (Asp-Glu-Ala-Asp) box polypeptide 54	1.65	0.000206	0.00221	0.00409
Dtx1	deltex 1 homolog (Drosophila)	1.93	5.07e-08	4.92e-06	9.09e-06
Rph3a	rabphilin 3A	2.01	0.00372	0.0172	0.0317
Rsrc2	arginine/serine-rich coiled-coil 2	0.59	3.72e-06	0.000129	0.000239
Hip1r	huntingtin interacting protein 1 related	1.68	1.49e-05	0.000343	0.000634
Abcb9	ATP-binding cassette, sub-family B (MDR/TAP), member 9	1.57	0.000888	0.00638	0.0118
Mphosph9	M-phase phosphoprotein 9	0.67	0.000436	0.00393	0.00726
Ubc	ubiquitin C	1.64	3.01e-09	5.38e-07	9.94e-07
Aacs	acetoacetyl-CoA synthetase	1.7	3.99e-09	6.98e-07	1.29e-06
Slc15a4	solute carrier family 15, member 4	1.54	0.000826	0.00612	0.0113
Mmp17	matrix metallopeptidase 17	2.09	5.04e-08	4.92e-06	9.09e-06
Caln1	calneuron 1	1.82	0.00905	0.0313	0.0579
Clip2	CAP-GLY domain containing linker protein 2	1.54	0.00766	0.0279	0.0515
Limk1	LIM-domain containing, protein kinase	1.99	1.51e-05	0.000345	0.000637
Stx1a	syntaxin 1A (brain)	2.59	9.23e-10	2.45e-07	4.53e-07
Vps37d	vacuolar protein sorting 37D (yeast)	1.58	0.00451	0.0195	0.036
Tbl2	transducin (beta)-like 2	1.52	0.00919	0.0317	0.0586
Por	P450 (cytochrome) oxidoreductase	1.53	3.33e-06	0.000121	0.000224
Ywhag	tyrosine 3-monooxygenase/tryptophan 5-monooxygenase activation protein, gamma polypeptide	1.83	3.67e-05	0.00065	0.0012
Sh2b2	SH2B adaptor protein 2	1.95	0.00165	0.00984	0.0182
Vgf	VGF nerve growth factor inducible	4.42	2.07e-07	1.46e-05	2.7e-05
Ap1s1	adaptor protein complex AP-1, sigma 1	1.76	1.51e-05	0.000345	0.000637
Ache	acetylcholinesterase	2.12	4.57e-08	4.6e-06	8.5e-06
Actl6b	actin-like 6B	1.82	1.58e-08	2.06e-06	3.81e-06
Nyap1	neuronal tyrosine-phosphorylated phosphoinositide 3-kinase adaptor 1	2.31	0.00366	0.017	0.0315
Gjc3	gap junction protein, gamma 3	0.54	0.00258	0.0135	0.025
Fam20c	family with sequence similarity 20, member C	1.63	0.00431	0.019	0.0351
Prkar1b	protein kinase, cAMP dependent regulatory, type I beta	2.39	2.17e-05	0.000434	0.000802
Adap1	ArfGAP with dual PH domains 1	2.23	0.000103	0.00138	0.00256
Chst12	carbohydrate sulfotransferase 12	1.61	0.00093	0.00655	0.0121
Gna12	guanine nucleotide binding protein, alpha 12	1.58	0.00385	0.0176	0.0325
Slc29a4	solute carrier family 29 (nucleoside transporters), member 4	2.69	5.02e-07	2.88e-05	5.32e-05
Fscn1	fascin homolog 1, actin bundling protein (Strongylocentrotus purpuratus)	1.58	0.0099	0.0333	0.0615
Nptx2	neuronal pentraxin 2	2.25	1.67e-09	3.94e-07	7.27e-07
Tmem130	transmembrane protein 130	2.3	3.57e-06	0.000126	0.000233
Gpr12	G-protein coupled receptor 12	2.73	0.000188	0.00207	0.00383
Pan3	PAN3 polyA specific ribonuclease subunit homolog (S. cerevisiae)	0.65	0.000366	0.0034	0.00629
N4bp2l2	NEDD4 binding protein 2-like 2	0.64	0.000765	0.00582	0.0108
Samd9l	sterile alpha motif domain containing 9-like	0.56	0.00245	0.013	0.0241
Gng11	guanine nucleotide binding protein (G protein), gamma 11	0.51	0.000102	0.00138	0.00255
Pon3	paraoxonase 3	0.58	2.15e-05	0.00043	0.000795
Asns	asparagine synthetase	1.52	0.00437	0.0191	0.0354
A430035B10Rik	RIKEN cDNA A430035B10 gene	0.63	5.61e-06	0.000176	0.000325
Cped1	cadherin-like and PC-esterase domain containing 1	0.43	0.000132	0.00165	0.00306
Fezf1	Fez family zinc finger 1	3.73	0.00119	0.00781	0.0144
Snd1	staphylococcal nuclease and tudor domain containing 1	1.52	1.7e-05	0.000369	0.000681
Irf5	interferon regulatory factor 5	1.8	0.00808	0.0289	0.0533
Tspan33	tetraspanin 33	1.87	0.000101	0.00137	0.00253
Creb3l2	cAMP responsive element binding protein 3-like 2	1.54	0.00317	0.0155	0.0287
Ubn2	ubinuclein 2	0.65	0.00725	0.0268	0.0496
Luc7l2	LUC7-like 2 (S. cerevisiae)	0.55	9.35e-06	0.000252	0.000465
Clec2l	C-type lectin domain family 2, member L	2.38	0.000506	0.00436	0.00806
Ephb6	Eph receptor B6	1.58	0.00496	0.0208	0.0384
Zyx	zyxin	1.89	4.64e-07	2.75e-05	5.08e-05
Zfp467	zinc finger protein 467	1.52	0.00698	0.0262	0.0485
Atp6v0e2	ATPase, H+ transporting, lysosomal V0 subunit E2	1.51	6.63e-05	0.00099	0.00183
AI854703	expressed sequence AI854703	1.9	0.0013	0.00834	0.0154
Gimap6	GTPase, IMAP family member 6	0.57	0.00694	0.0261	0.0483
Igf2bp3	insulin-like growth factor 2 mRNA binding protein 3	0.56	3.11e-05	0.000568	0.00105
Tra2a	transformer 2 alpha homolog (Drosophila)	0.62	0.000134	0.00167	0.00309
Npy	neuropeptide Y	1.62	0.00392	0.0178	0.0329
Tril	TLR4 interactor with leucine-rich repeats	1.55	0.00489	0.0206	0.0381
Chn2	chimerin 2	1.56	0.00952	0.0323	0.0598
A730020E08Rik	RIKEN cDNA A730020E08 gene	0.6	0.000191	0.0021	0.00388
Krcc1	lysine-rich coiled-coil 1	0.64	0.000161	0.00187	0.00346
Reep1	receptor accessory protein 1	1.53	0.000996	0.00685	0.0127
Lrrtm1	leucine rich repeat transmembrane neuronal 1	1.58	0.00185	0.0106	0.0196
6330415B21Rik	RIKEN cDNA 6330415B21 gene	0.62	0.00206	0.0115	0.0212
Sema4f	sema domain, immunoglobulin domain (Ig), TM domain, and short cytoplasmic domain	1.89	0.000116	0.0015	0.00277
Rtkn	rhotekin	1.64	0.00297	0.0149	0.0275
Fbxo41	F-box protein 41	2.25	1.16e-07	9.06e-06	1.67e-05
Tgfa	transforming growth factor alpha	1.94	0.003	0.015	0.0277
Tia1	cytotoxic granule-associated RNA binding protein 1	0.66	2.32e-05	0.000453	0.000837
Efcc1	EF hand and coiled-coil domain containing 1	0.48	0.00965	0.0326	0.0603
Copg1	coatomer protein complex, subunit gamma 1	1.54	1.26e-08	1.78e-06	3.28e-06
Plxna1	plexin A1	1.64	0.00057	0.00469	0.00867
Txnrd3	thioredoxin reductase 3	1.59	0.00115	0.00762	0.0141
Aldh1l1	aldehyde dehydrogenase 1 family, member L1	1.67	0.000242	0.00253	0.00467
Slc41a3	solute carrier family 41, member 3	1.75	0.00321	0.0156	0.0289
Kbtbd8	kelch repeat and BTB (POZ) domain containing 8	0.6	0.000128	0.00162	0.003
Eogt	EGF domain-specific O-linked N-acetylglucosamine (GlcNAc) transferase	0.63	0.0014	0.00881	0.0163
Mitf	microphthalmia-associated transcription factor	0.62	0.00258	0.0135	0.025
Pdzrn3	PDZ domain containing RING finger 3	1.63	0.00296	0.0148	0.0275
Gm19757	predicted gene, 19757	0.66	0.00184	0.0106	0.0196
Il5ra	interleukin 5 receptor, alpha	0.44	7.92e-05	0.00115	0.00212
Bhlhe40	basic helix-loop-helix family, member e40	1.6	0.00012	0.00155	0.00286
Lhfpl4	lipoma HMGIC fusion partner-like protein 4	1.51	0.00275	0.0141	0.0261
Cpne9	copine family member IX	1.73	0.00357	0.0167	0.0308
Prrt3	proline-rich transmembrane protein 3	1.69	0.000175	0.002	0.0037
Atp2b2	ATPase, Ca++ transporting, plasma membrane 2	1.86	2.24e-08	2.73e-06	5.05e-06
Slc6a1	solute carrier family 6 (neurotransmitter transporter, GABA), member 1	2.56	2.82e-07	1.89e-05	3.5e-05
Syn2	synapsin II	2.54	4.33e-05	0.000724	0.00134
Ret	ret proto-oncogene	1.83	0.000894	0.00641	0.0118
Nanog	Nanog homeobox	0.38	0.000249	0.00258	0.00476
Slc2a3	solute carrier family 2 (facilitated glucose transporter), member 3	2.05	8.16e-08	6.99e-06	1.29e-05
Pex5	peroxisomal biogenesis factor 5	1.54	1.7e-06	7.25e-05	0.000134
Clstn3	calsyntenin 3	1.82	8.71e-11	5.18e-08	9.58e-08
Eno2	enolase 2, gamma neuronal	1.65	1.62e-10	6.57e-08	1.22e-07
Usp5	ubiquitin specific peptidase 5 (isopeptidase T)	1.59	1.17e-05	0.000294	0.000544
Vwf	Von Willebrand factor homolog	1.8	0.000542	0.00455	0.00841
Kcna5	potassium voltage-gated channel, shaker-related subfamily, member 5	1.81	0.00025	0.00258	0.00477
Kcna6	potassium voltage-gated channel, shaker-related, subfamily, member 6	1.64	0.00386	0.0176	0.0326
Tspan9	tetraspanin 9	1.59	9.14e-06	0.000249	0.000459
Nrip2	nuclear receptor interacting protein 2	1.59	0.000187	0.00207	0.00382
8430419L09Rik	RIKEN cDNA 8430419L09 gene	2.1	4.59e-11	4.06e-08	7.51e-08
Mgp	matrix Gla protein	0.55	0.00391	0.0178	0.0328
Ptpro	protein tyrosine phosphatase, receptor type, O	1.89	1.09e-06	5.01e-05	9.26e-05
Pde3a	phosphodiesterase 3A, cGMP inhibited	1.62	0.00415	0.0185	0.0342
Gm6313	predicted gene 6313	0.53	0.00337	0.0161	0.0297
2810474O19Rik	RIKEN cDNA 2810474O19 gene	0.66	0.0059	0.0236	0.0437
Syt5	synaptotagmin V	2.19	0.000178	0.00202	0.00373
Zfp580	zinc finger protein 580	1.53	0.00411	0.0183	0.0339
Vmn1r58	vomeronasal 1 receptor 58	0.48	3.02e-08	3.28e-06	6.07e-06
Vmn2r55	vomeronasal 2, receptor 55	0.45	0.000778	0.0059	0.0109
Zfp329	zinc finger protein 329	0.58	0.000201	0.00219	0.00405
Strn4	striatin, calmodulin binding protein 4	1.67	9.97e-07	4.75e-05	8.78e-05
Dact3	dapper homolog 3, antagonist of beta-catenin (xenopus)	1.71	7.15e-06	0.000207	0.000383
Pnmal2	PNMA-like 2	1.68	0.0023	0.0124	0.0229
Irf2bp1	interferon regulatory factor 2 binding protein 1	1.51	0.000116	0.0015	0.00277
Fbxo46	F-box protein 46	1.57	0.00072	0.00558	0.0103
Eml2	echinoderm microtubule associated protein like 2	1.66	0.00128	0.00823	0.0152
Rtn2	reticulon 2 (Z-band associated protein)	1.56	8.66e-05	0.00122	0.00226
Mark4	MAP/microtubule affinity-regulating kinase 4	1.61	0.00409	0.0183	0.0338
Tomm40	translocase of outer mitochondrial membrane 40 homolog (yeast)	1.5	0.000556	0.00461	0.00852
Pvrl2	poliovirus receptor-related 2	1.81	3.55e-06	0.000126	0.000233
Atp1a3	ATPase, Na+/K+ transporting, alpha 3 polypeptide	1.59	7.02e-06	0.000207	0.000383
Zfp574	zinc finger protein 574	1.52	0.00525	0.0217	0.0402
Prr19	proline rich 19	3.52	0.00561	0.0228	0.0422
Ceacam1	carcinoembryonic antigen-related cell adhesion molecule 1	0.47	0.000946	0.00661	0.0122
Ccdc97	coiled-coil domain containing 97	1.59	1.34e-05	0.000318	0.000589
Cyp2s1	cytochrome P450, family 2, subfamily s, polypeptide 1	2.5	0.000799	0.00598	0.0111
Numbl	numb-like	2	2.33e-09	4.82e-07	8.91e-07
Sptbn4	spectrin beta, non-erythrocytic 4	1.78	0.000938	0.00659	0.0122
Pld3	phospholipase D family, member 3	1.69	2.48e-05	0.000477	0.000883
2310022A10Rik	RIKEN cDNA 2310022A10 gene	1.52	0.00032	0.0031	0.00573
Zfp626	zinc finger protein 626	0.62	0.00108	0.00725	0.0134
Zfp780b	zinc finger protein 780B	0.59	2.59e-06	0.0001	0.000186
Zfp850	zinc finger protein 850	0.64	0.00319	0.0156	0.0288
Dpf1	D4, zinc and double PHD fingers family 1	2.54	7.19e-07	3.71e-05	6.86e-05
Clip3	CAP-GLY domain containing linker protein 3	2.4	6.53e-12	1.05e-08	1.94e-08
Aplp1	amyloid beta (A4) precursor-like protein 1	1.81	1.58e-07	1.14e-05	2.1e-05
Arhgap33	Rho GTPase activating protein 33	2	2.09e-05	0.000425	0.000786
Fxyd7	FXYD domain-containing ion transport regulator 7	2.48	0.00265	0.0138	0.0255
Gpi1	glucose phosphate isomerase 1	2	6.64e-10	1.86e-07	3.44e-07
Chst8	carbohydrate (N-acetylgalactosamine 4-0) sulfotransferase 8	2.15	0.00464	0.0199	0.0367
Pdcd5	programmed cell death 5	0.66	0.000612	0.00494	0.00912
AI987944	expressed sequence AI987944	0.59	1.7e-05	0.000369	0.000681
AW146154	expressed sequence AW146154	0.63	0.000555	0.00461	0.00852
Zfp788	zinc finger protein 788	0.64	3.7e-05	0.000652	0.00121
9830147E19Rik	RIKEN cDNA 9830147E19 gene	0.47	0.00223	0.0121	0.0224
Gm5595	predicted gene 5595	0.59	1.2e-05	0.000298	0.000551
Syt3	synaptotagmin III	2.32	1.54e-06	6.66e-05	0.000123
Myh14	myosin, heavy polypeptide 14	1.79	6.36e-05	0.000961	0.00178
Ap2a1	adaptor-related protein complex 2, alpha 1 subunit	1.53	0.000372	0.00344	0.00637
Aldh16a1	aldehyde dehydrogenase 16 family, member A1	1.71	0.000226	0.00238	0.00441
Rasip1	Ras interacting protein 1	1.58	0.000559	0.00463	0.00856
Ptpn5	protein tyrosine phosphatase, non-receptor type 5	2.93	4.12e-06	0.000138	0.000254
Mrgpra6	MAS-related GPR, member A6	0.52	3e-08	3.28e-06	6.07e-06
Snhg14	DNA segment, Chr 7, ERATO Doi 715, expressed	0.6	6.87e-06	0.000203	0.000376
Snurf	SNRPN upstream reading frame	1.87	0.00196	0.0111	0.0206
A230057D06Rik	RIKEN cDNA A230057D06 gene	0.48	2.6e-06	0.0001	0.000186
Ndn	necdin	1.54	0.00715	0.0266	0.0492
Otud7a	OTU domain containing 7A	1.78	0.000496	0.00427	0.0079
Mphosph10	M-phase phosphoprotein 10 (U3 small nucleolar ribonucleoprotein)	0.65	0.00389	0.0177	0.0327
Apba2	amyloid beta (A4) precursor protein-binding, family A, member 2	2.13	1.31e-10	6.22e-08	1.15e-07
Gm29683	Derived by automated computational analysis using gene prediction method: Gnomon.	0.5	3.81e-05	0.000664	0.00123
Fam174b	family with sequence similarity 174, member B	1.8	0.000577	0.00473	0.00874
4930533N22Rik	RIKEN cDNA 4930533N22 gene	0.51	2.06e-05	0.000423	0.000781
Prc1	protein regulator of cytokinesis 1	0.64	0.00866	0.0304	0.0561
Saxo2	family with sequence similarity 154, member B	0.61	0.000914	0.00649	0.012
Arnt2	aryl hydrocarbon receptor nuclear translocator 2	1.99	1.05e-06	4.96e-05	9.17e-05
Gm2115	predicted gene 2115	2.06	0.00162	0.0097	0.0179
Nox4	NADPH oxidase 4	0.59	0.000276	0.00277	0.00513
Tyr	tyrosinase	0.58	9.68e-05	0.00132	0.00245
Kctd21	potassium channel tetramerisation domain containing 21	1.54	0.00297	0.0149	0.0275
Pak1	p21 protein (Cdc42/Rac)-activated kinase 1	1.77	0.000888	0.00638	0.0118
Capn5	calpain 5	2.16	1.26e-06	5.66e-05	0.000105
Dgat2	diacylglycerol O-acyltransferase 2	1.84	2.75e-05	0.000512	0.000946
Map6	microtubule-associated protein 6	1.7	6.15e-07	3.28e-05	6.07e-05
Arrb1	arrestin, beta 1	2	2.76e-11	3.17e-08	5.86e-08
Gm4980	predicted gene 4980	1.7	0.000903	0.00643	0.0119
Kcne3	potassium voltage-gated channel, Isk-related subfamily, gene 3	0.32	0.000655	0.00519	0.0096
Ppme1	protein phosphatase methylesterase 1	1.51	0.000156	0.00183	0.00339
Relt	RELT tumor necrosis factor receptor	1.54	0.00789	0.0284	0.0524
Arhgef17	Rho guanine nucleotide exchange factor (GEF) 17	1.82	3.65e-06	0.000128	0.000236
Pde2a	phosphodiesterase 2A, cGMP-stimulated	1.83	2.92e-09	5.37e-07	9.92e-07
Olfr613	olfactory receptor 613	0.51	1.67e-08	2.14e-06	3.95e-06
Usp17la	ubiquitin specific peptidase 17-like A	0.51	0.000571	0.00469	0.00867
Dchs1	dachsous 1 (Drosophila)	1.63	0.006	0.0239	0.0442
Gm15645	predicted gene 15645	0.37	0.00958	0.0325	0.0601
Gvin1	GTPase, very large interferon inducible 1	0.43	0.000315	0.00307	0.00567
Trim66	tripartite motif-containing 66	2.12	0.000248	0.00257	0.00475
Nrip3	nuclear receptor interacting protein 3	1.76	0.00377	0.0174	0.0321
Ampd3	adenosine monophosphate deaminase 3	1.68	0.00116	0.00766	0.0142
Galnt18	UDP-N-acetyl-alpha-D-galactosamine:polypeptide N-acetylgalactosaminyltransferase 18	1.53	0.00926	0.0318	0.0588
Pik3c2a	phosphatidylinositol 3-kinase, C2 domain containing, alpha polypeptide	0.58	8.31e-05	0.00118	0.00219
Smg1	SMG1 homolog, phosphatidylinositol 3-kinase-related kinase (C. elegans)	0.61	7.59e-06	0.000216	0.000399
Ccp110	centriolar coiled coil protein 110	0.6	2.15e-05	0.00043	0.000795
Cacng3	calcium channel, voltage-dependent, gamma subunit 3	2.58	2.93e-09	5.37e-07	9.92e-07
Gsg1l	GSG1-like	2.03	5.07e-07	2.88e-05	5.32e-05
Sbk1	SH3-binding kinase 1	1.93	1.04e-08	1.58e-06	2.93e-06
Aldoa	aldolase A, fructose-bisphosphate	1.62	3.79e-07	2.35e-05	4.34e-05
Doc2a	double C2, alpha	1.92	3.4e-06	0.000122	0.000226
Kctd13	potassium channel tetramerisation domain containing 13	1.63	0.000328	0.00316	0.00584
Sez6l2	seizure related 6 homolog like 2	1.56	1.11e-05	0.000285	0.000527
Stx1b	syntaxin 1B	2.64	5.47e-07	3.08e-05	5.7e-05
Armc5	armadillo repeat containing 5	1.53	0.00028	0.00281	0.0052
Tcerg1l	transcription elongation regulator 1-like	2.06	0.000262	0.00267	0.00493
Bnip3	BCL2/adenovirus E1B interacting protein 3	1.52	0.00297	0.0149	0.0275
Dpysl4	dihydropyrimidinase-like 4	1.85	1.63e-05	0.000357	0.00066
Caly	calcyon neuron-specific vesicular protein	1.94	0.00103	0.00706	0.0131
Cend1	cell cycle exit and neuronal differentiation 1	2.28	0.000139	0.0017	0.00315
Tollip	toll interacting protein	1.63	6.85e-08	6.4e-06	1.18e-05
Th	tyrosine hydroxylase	2.75	0.00667	0.0254	0.047
Kcnq1ot1	KCNQ1 overlapping transcript 1	0.55	2.63e-06	0.0001	0.000186
Fadd	Fas (TNFRSF6)-associated via death domain	0.57	0.00599	0.0239	0.0442
Insr	insulin receptor	0.63	0.00072	0.00558	0.0103
A430078G23Rik	RIKEN cDNA A430078G23 gene	0.61	0.000879	0.00635	0.0117
Camsap3	calmodulin regulated spectrin-associated protein family, member 3	1.63	2.27e-06	8.99e-05	0.000166
Zfp958	zinc finger protein 958	0.59	0.00093	0.00655	0.0121
Arglu1	arginine and glutamate rich 1	0.61	9.52e-06	0.000255	0.000471
Gm5607	predicted gene 5607	0.53	0.00171	0.0101	0.0186
Rasa3	RAS p21 protein activator 3	1.69	2.5e-05	0.000479	0.000885
Arhgef10	Rho guanine nucleotide exchange factor (GEF) 10	1.64	0.000978	0.00677	0.0125
Angpt2	angiopoietin 2	0.64	0.00622	0.0244	0.0451
A930013F10Rik	RIKEN cDNA A930013F10 gene	0.53	4.91e-05	0.000794	0.00147
Star	steroidogenic acute regulatory protein	0.65	0.00209	0.0116	0.0215
Chrnb3	cholinergic receptor, nicotinic, beta polypeptide 3	1.75	0.00884	0.0308	0.0569
Dusp26	dual specificity phosphatase 26 (putative)	1.59	4.89e-06	0.000158	0.000292
Dusp4	dual specificity phosphatase 4	1.63	0.00495	0.0208	0.0384
Hmgb2	high mobility group box 2	0.67	0.00162	0.00969	0.0179
Ddx60	DEAD (Asp-Glu-Ala-Asp) box polypeptide 60	0.57	0.000582	0.00476	0.0088
Zfp930	zinc finger protein 930	0.66	0.0022	0.012	0.0223
D130040H23Rik	RIKEN cDNA D130040H23 gene	0.54	0.000319	0.0031	0.00572
Cers1	ceramide synthase 1	1.8	6.05e-06	0.000186	0.000344
Upf1	UPF1 regulator of nonsense transcripts homolog (yeast)	1.52	0.00205	0.0114	0.0211
Crtc1	CREB regulated transcription coactivator 1	1.55	0.000513	0.00439	0.00812
Tmem59l	transmembrane protein 59-like	1.73	0.000108	0.00143	0.00264
Rab3a	RAB3A, member RAS oncogene family	1.71	0.000132	0.00165	0.00305
Pik3r2	phosphatidylinositol 3-kinase, regulatory subunit, polypeptide 2 (p85 beta)	1.61	1.13e-05	0.000286	0.00053
Zfp882	zinc finger protein 882	0.62	1.07e-05	0.000278	0.000513
Zfp617	zinc finger protein 617	0.57	3.87e-05	0.00067	0.00124
Zfp961	zinc finger protein 961	0.66	0.000138	0.0017	0.00314
Rasd2	RASD family, member 2	3.25	8.63e-11	5.18e-08	9.58e-08
Tbc1d9	TBC1 domain family, member 9	1.88	0.000222	0.00235	0.00435
Prkaca	protein kinase, cAMP dependent, catalytic, alpha	1.67	2.17e-06	8.82e-05	0.000163
Cacna1a	calcium channel, voltage-dependent, P/Q type, alpha 1A subunit	1.57	0.00515	0.0214	0.0396
Nfix	nuclear factor I/X	1.82	9.9e-06	0.00026	0.00048
Irx5	Iroquois related homeobox 5 (Drosophila)	1.84	0.00164	0.00977	0.0181
Irx6	Iroquois related homeobox 6 (Drosophila)	1.96	9.39e-06	0.000252	0.000466
Ces5a	carboxylesterase 5A	0.36	0.00613	0.0242	0.0447
Cx3cl1	chemokine (C-X3-C motif) ligand 1	2.37	1e-07	7.98e-06	1.47e-05
Adgrg1	G protein-coupled receptor 56	2.19	2.91e-06	0.000109	0.000202
Ndrg4	N-myc downstream regulated gene 4	2.59	2.53e-05	0.00048	0.000886
Bean1	brain expressed, associated with Nedd4, 1	2.21	0.00103	0.00706	0.0131
Cklf	chemokine-like factor	0.52	0.000826	0.00612	0.0113
Car7	carbonic anhydrase 7	1.84	0.00541	0.0223	0.0411
4931428F04Rik	RIKEN cDNA 4931428F04 gene	1.52	0.0011	0.00732	0.0135
Rltpr	RGD motif, leucine rich repeats, tropomodulin domain and proline-rich containing	1.91	0.000182	0.00204	0.00376
Gfod2	glucose-fructose oxidoreductase domain containing 2	1.63	5.7e-05	0.000885	0.00164
Slc12a4	solute carrier family 12, member 4	1.61	0.00101	0.00696	0.0129
Smpd3	sphingomyelin phosphodiesterase 3, neutral	1.56	3.54e-05	0.000635	0.00117
Nfat5	nuclear factor of activated T cells 5	0.64	0.00409	0.0183	0.0338
Aars	alanyl-tRNA synthetase	1.54	0.000142	0.00174	0.00321
Cmip	c-Maf inducing protein	1.95	2.06e-09	4.48e-07	8.28e-07
Cdh13	cadherin 13	1.51	0.00758	0.0277	0.0512
6430548M08Rik	RIKEN cDNA 6430548M08 gene	1.86	1.59e-08	2.06e-06	3.81e-06
Fbxo31	F-box protein 31	1.57	2.32e-05	0.000453	0.000837
Spata2l	spermatogenesis associated 2-like	1.6	0.00501	0.0209	0.0387
Tubb3	tubulin, beta 3 class III	2.07	3.48e-05	0.000626	0.00116
Dbndd1	dysbindin (dystrobrevin binding protein 1) domain containing 1	2.02	8.02e-06	0.000226	0.000417
Rab4a	RAB4A, member RAS oncogene family	1.52	0.000537	0.00454	0.00839
Pgbd5	piggyBac transposable element derived 5	1.68	3.2e-06	0.000117	0.000216
Egln1	EGL nine homolog 1 (C. elegans)	1.9	0.000135	0.00168	0.0031
Sipa1l2	signal-induced proliferation-associated 1 like 2	1.52	0.000741	0.00569	0.0105
Cwf19l2	CWF19-like 2, cell cycle control (S. pombe)	0.56	1.45e-05	0.000335	0.00062
Kbtbd3	kelch repeat and BTB (POZ) domain containing 3	0.62	1.53e-05	0.000346	0.00064
Cep126	cDNA sequence AK129341	0.66	0.00469	0.02	0.037
1700128F08Rik	U1-snRNP binding protein homolog pseudogene	0.41	0.00212	0.0117	0.0217
Phxr4	per-hexamer repeat gene 4	0.34	5.26e-09	8.82e-07	1.63e-06
Cep57	centrosomal protein 57	0.63	0.000202	0.00219	0.00405
Taf1d	TATA box binding protein (Tbp)-associated factor, RNA polymerase I, D	0.63	0.000136	0.00168	0.0031
Cep295	RIKEN cDNA 5830418K08 gene	0.58	6.37e-05	0.000961	0.00178
Olfr856-ps1	olfactory receptor 856, pseudogene 1	0.46	2.58e-10	9.38e-08	1.73e-07
Zfp26	zinc finger protein 26	0.65	5.21e-06	0.000165	0.000305
Fbxl12os	F-box and leucine-rich repeat protein 12, opposite strand	0.62	0.00152	0.00926	0.0171
Olfm2	olfactomedin 2	2.26	1.97e-06	8.14e-05	0.00015
Icam5	intercellular adhesion molecule 5, telencephalin	2.09	0.00469	0.02	0.037
Pde4a	phosphodiesterase 4A, cAMP specific	1.89	1.26e-07	9.67e-06	1.79e-05
Lppr2	cDNA sequence BC018242	1.7	2.22e-06	8.94e-05	0.000165
Elavl3	ELAV (embryonic lethal, abnormal vision, Drosophila)-like 3 (Hu antigen C)	1.88	0.000186	0.00206	0.00381
Glb1l3	galactosidase, beta 1 like 3	0.51	0.000176	0.00201	0.00371
Kirrel3	kin of IRRE like 3 (Drosophila)	1.53	0.00034	0.00323	0.00598
Pknox2	Pbx/knotted 1 homeobox 2	1.85	0.00136	0.00865	0.016
Ubash3b	ubiquitin associated and SH3 domain containing, B	1.99	1.17e-07	9.06e-06	1.67e-05
3110039I08Rik	RIKEN cDNA 3110039I08 gene	0.5	3.61e-07	2.3e-05	4.26e-05
Sorl1	sortilin-related receptor, LDLR class A repeats-containing	1.71	0.000848	0.00622	0.0115
Grik4	glutamate receptor, ionotropic, kainate 4	1.81	0.0076	0.0277	0.0513
Tmem25	transmembrane protein 25	1.72	1.89e-05	0.000397	0.000734
Drd2	dopamine receptor D2	1.61	0.00171	0.0101	0.0186
Il18	interleukin 18	0.58	0.00139	0.0088	0.0163
Sik2	salt inducible kinase 2	0.53	0.000409	0.00373	0.0069
Cib2	calcium and integrin binding family member 2	1.62	0.0063	0.0246	0.0455
Chrna3	cholinergic receptor, nicotinic, alpha polypeptide 3	1.57	0.000831	0.00612	0.0113
Lingo1	leucine rich repeat and Ig domain containing 1	2.18	2e-06	8.2e-05	0.000152
Cspg4	chondroitin sulfate proteoglycan 4	1.56	0.00515	0.0214	0.0396
1700017B05Rik	RIKEN cDNA 1700017B05 gene	1.64	0.00324	0.0158	0.0291
Rpp25	ribonuclease P/MRP 25 subunit	2.01	0.000436	0.00393	0.00726
Senp8	SUMO/sentrin specific peptidase 8	0.66	0.00234	0.0126	0.0232
Larp6	La ribonucleoprotein domain family, member 6	2.12	0.000243	0.00254	0.00469
Gm10653	ribsomal protein S2 pseudogene	0.61	0.00519	0.0215	0.0398
Calml4	calmodulin-like 4	0.6	0.000996	0.00685	0.0127
Smad3	SMAD family member 3	1.6	0.00216	0.0119	0.022
Zwilch	zwilch kinetochore protein	0.41	1.14e-05	0.000286	0.00053
Plekho2	pleckstrin homology domain containing, family O member 2	1.71	2.94e-05	0.000543	0.001
Rbpms2	RNA binding protein with multiple splicing 2	1.57	4.98e-07	2.88e-05	5.32e-05
2810417H13Rik	RIKEN cDNA 2810417H13 gene	0.58	0.000689	0.00538	0.00995
9530091C08Rik	RIKEN cDNA 9530091C08 gene	0.49	9.46e-05	0.0013	0.0024
Myo1e	myosin IE	1.55	0.00552	0.0226	0.0418
Mns1	meiosis-specific nuclear structural protein 1	0.59	0.000147	0.00177	0.00328
Tex9	testis expressed gene 9	0.61	6.24e-07	3.3e-05	6.11e-05
Gsta4	glutathione S-transferase, alpha 4	0.57	0.00236	0.0126	0.0233
Phip	pleckstrin homology domain interacting protein	0.64	1.14e-05	0.000286	0.00053
Dopey1	dopey family member 1	0.63	5.41e-05	0.00085	0.00157
Rasgrf1	RAS protein-specific guanine nucleotide-releasing factor 1	2.22	9.85e-06	0.000259	0.000479
E330023G01Rik	RIKEN cDNA E330023G01 gene	0.43	0.000515	0.0044	0.00813
Esyt3	extended synaptotagmin-like protein 3	0.36	0.00671	0.0255	0.0472
Ppp2r3a	protein phosphatase 2, regulatory subunit B'', alpha	0.64	0.000213	0.00227	0.0042
Ephb1	Eph receptor B1	2.1	5.43e-05	0.000851	0.00157
Rab6b	RAB6B, member RAS oncogene family	1.93	1.24e-10	6.22e-08	1.15e-07
Grm2	glutamate receptor, metabotropic 2	2.79	1.61e-05	0.000355	0.000656
Gnai2	guanine nucleotide binding protein (G protein), alpha inhibiting 2	1.52	0.00271	0.014	0.0259
Camkv	CaM kinase-like vesicle-associated	1.88	2.29e-05	0.00045	0.000832
Gmppb	GDP-mannose pyrophosphorylase B	1.52	0.000517	0.00441	0.00815
Dag1	dystroglycan 1	1.5	0.00225	0.0122	0.0226
Lamb2	laminin, beta 2	1.51	0.00335	0.0161	0.0297
Wdr6	WD repeat domain 6	1.61	1.27e-07	9.67e-06	1.79e-05
Shisa5	shisa homolog 5 (Xenopus laevis)	1.64	8.89e-05	0.00124	0.0023
Map4	microtubule-associated protein 4	1.51	1.87e-05	0.000395	0.000731
Arpp21	cyclic AMP-regulated phosphoprotein, 21	2.16	0.000863	0.00629	0.0116
Osbpl10	oxysterol binding protein-like 10	1.96	0.000556	0.00461	0.00852
Tgfbr2	transforming growth factor, beta receptor II	1.52	0.000863	0.00629	0.0116
Eomes	eomesodermin homolog (Xenopus laevis)	2.28	0.00588	0.0235	0.0435
Itga9	integrin alpha 9	1.75	0.000485	0.00421	0.00778
Cx3cr1	chemokine (C-X3-C motif) receptor 1	1.61	0.000479	0.00419	0.00774
Nktr	natural killer tumor recognition sequence	0.65	0.00792	0.0284	0.0526
Kif15	kinesin family member 15	0.44	0.000735	0.00566	0.0105
Lztfl1	leucine zipper transcription factor-like 1	0.65	0.000425	0.00385	0.00711
Ccr9	chemokine (C-C motif) receptor 9	0.51	0.00187	0.0107	0.0198
2010315B03Rik	RIKEN cDNA 2010315B03 gene	0.61	0.000309	0.00302	0.00559
TrnQ	tRNA glutamine, mitochondrial	0.47	0.00496	0.0208	0.0384
ND2	NADH dehydrogenase 2, mitochondrial	0.61	0.000667	0.00526	0.00972
TrnS1	tRNA serine 1, mitochondrial	0.57	0.000245	0.00255	0.00472
ATP6	ATP synthase 6, mitochondrial	0.65	0.00799	0.0287	0.053
ND3	NADH dehydrogenase 3, mitochondrial	0.65	0.00392	0.0178	0.0329
ND4L	NADH dehydrogenase 4L, mitochondrial	0.66	0.000108	0.00143	0.00264
ND4	NADH dehydrogenase 4, mitochondrial	0.57	0.000579	0.00474	0.00876
ND5	NADH dehydrogenase 5, mitochondrial	0.55	1.12e-05	0.000286	0.00053
ND6	NADH dehydrogenase 6, mitochondrial	0.5	3.28e-06	0.00012	0.000221
TrnE	tRNA glutamic acid, mitochondrial	0.44	6.51e-05	0.000977	0.00181
CYTB	cytochrome b, mitochondrial	0.65	0.0015	0.00925	0.0171
Praf2	PRA1 domain family 2	1.51	0.00472	0.0201	0.0372
Ccdc120	coiled-coil domain containing 120	1.78	0.00191	0.0109	0.0202
Pim2	proviral integration site 2	1.58	1.04e-05	0.000272	0.000503
Rbm3	RNA binding motif protein 3	0.66	0.000339	0.00323	0.00597
Tbc1d25	TBC1 domain family, member 25	1.56	0.00564	0.0229	0.0423
Srpx	sushi-repeat-containing protein	0.45	8.04e-05	0.00116	0.00215
Rpgr	retinitis pigmentosa GTPase regulator	0.52	0.00288	0.0145	0.0269
Ddx3x	DEAD/H (Asp-Glu-Ala-Asp/His) box polypeptide 3, X-linked	0.64	9.66e-07	4.63e-05	8.56e-05
Rp2h	retinitis pigmentosa 2 homolog (human)	0.6	0.000996	0.00685	0.0127
Cdk16	cyclin-dependent kinase 16	1.58	1.4e-07	1.04e-05	1.93e-05
Syn1	synapsin I	3.47	3.87e-10	1.25e-07	2.3e-07
Zfp182	zinc finger protein 182	0.53	4.15e-05	0.000704	0.0013
Upf3b	UPF3 regulator of nonsense transcripts homolog B (yeast)	0.57	3.68e-05	0.00065	0.0012
Thoc2	THO complex 2	0.59	2.35e-07	1.65e-05	3.04e-05
Xiap	X-linked inhibitor of apoptosis	0.64	5.94e-05	0.000913	0.00169
Arhgap36	Rho GTPase activating protein 36	3.48	0.00365	0.017	0.0314
Rap2c	RAP2C, member of RAS oncogene family	0.64	0.0098	0.0331	0.0611
Mbnl3	muscleblind-like 3 (Drosophila)	0.44	0.00368	0.0171	0.0316
Zfp449	zinc finger protein 449	0.65	0.00152	0.00929	0.0172
Smim10l2a	RIKEN cDNA 6330419J24 gene	1.77	0.000105	0.0014	0.0026
C030023E24Rik	RIKEN cDNA C030023E24 gene	0.65	0.007	0.0263	0.0485
Gabra3	gamma-aminobutyric acid (GABA) A receptor, subunit alpha 3	1.75	0.00984	0.0331	0.0613
Zfp185	zinc finger protein 185	0.64	0.00151	0.00925	0.0171
L1cam	L1 cell adhesion molecule	2.32	6e-07	3.26e-05	6.04e-05
Dmd	dystrophin, muscular dystrophy	0.64	0.00295	0.0148	0.0274
Pola1	polymerase (DNA directed), alpha 1	0.56	5.86e-07	3.25e-05	6e-05
Msn	moesin	1.71	0.000485	0.00421	0.00778
Efnb1	ephrin B1	1.55	0.000815	0.00606	0.0112
Nlgn3	neuroligin 3	2.27	5.93e-07	3.25e-05	6e-05
Itgb1bp2	integrin beta 1 binding protein 2	0.46	0.00701	0.0263	0.0486
Cited1	Cbp/p300-interacting transactivator with Glu/Asp-rich carboxy-terminal domain 1	1.69	0.00337	0.0161	0.0297
Gm9159	predicted gene 9159	0.51	2.6e-05	0.000492	0.00091
Ftx	Ftx transcript, Xist regulator (non-protein coding)	0.58	0.000183	0.00205	0.00378
Zdhhc15	zinc finger, DHHC domain containing 15	0.62	0.0084	0.0296	0.0548
5530601H04Rik	RIKEN cDNA 5530601H04 gene	0.63	0.00202	0.0113	0.0209
Magee1	melanoma antigen, family E, 1	2.15	2.76e-08	3.13e-06	5.79e-06
Atrx	alpha thalassemia/mental retardation syndrome X-linked homolog (human)	0.62	4.14e-05	0.000703	0.0013
Lpar4	lysophosphatidic acid receptor 4	0.41	0.00102	0.00699	0.0129
A630033H20Rik	RIKEN cDNA A630033H20 gene	0.35	0.00662	0.0253	0.0468
Hmgn5	high-mobility group nucleosome binding domain 5	0.59	0.00371	0.0172	0.0317
Zmat1	zinc finger, matrin type 1	0.61	0.000807	0.00602	0.0111
Plp1	proteolipid protein (myelin) 1	0.56	0.00256	0.0135	0.0249
Rnf128	ring finger protein 128	1.86	0.00291	0.0147	0.0271
Gucy2f	guanylate cyclase 2f	0.62	4.64e-05	0.000762	0.00141
Mageb16-ps1	melanoma antigen family B, 16, pseudogene 1	0.29	6.78e-06	0.000201	0.000372
Fgd1	FYVE, RhoGEF and PH domain containing 1	1.5	0.00831	0.0294	0.0544
3010001F23Rik	RIKEN cDNA 3010001F23 gene	0.65	0.00678	0.0257	0.0475
Yy2	Yy2 transcription factor	0.5	0.00151	0.00925	0.0171
Cnksr2	connector enhancer of kinase suppressor of Ras 2	1.6	0.000485	0.00421	0.00778
A830080D01Rik	RIKEN cDNA A830080D01 gene	0.64	0.000541	0.00455	0.00841
Scml2	sex comb on midleg-like 2 (Drosophila)	0.56	0.00682	0.0258	0.0477
Rai2	retinoic acid induced 2	1.55	0.00755	0.0276	0.051
Tmem27	transmembrane protein 27	0.62	0.000781	0.00591	0.0109
Tmsb4x	thymosin, beta 4, X chromosome	0.64	0.000282	0.00282	0.00522
G530011O06Rik	RIKEN cDNA G530011O06 gene	0.48	3.79e-07	2.35e-05	4.34e-05
Erdr1	erythroid differentiation regulator 1	0.5	0.000145	0.00176	0.00326
Synj2bp-cox16	-	0.55	0.0083	0.0294	0.0544
Gm37013	-	10.82	8.47e-14	3.41e-10	6.31e-10
Gm38666	-	4.09	2.53e-05	0.00048	0.000886
